# Supplementary material for: Regioselectivity among six secondary hydroxyl groups: selective acylation of the least reactive hydroxyl groups of inositol
Source: Royal Society of Chemistry journal article supplement (doi:10.1039/c2cc17241k), 2012-01-01
Supplement: c2cc17241k.pdf [file c2cc17241k.pdf]

## Supplementary Information

# Regioselectivity among six secondary hydroxyl groups: Selective acylation of the least reactive hydroxyl groups of inositol

Amol M. Vibhute, Adiyala Vidyasagar, Saritha Sarala, and Kana M. Sureshan\*

*School of Chemistry*

*Indian Institute of Science Education and Research, Thiruvananthapuram*

*CET Campus, Thiruvananthapuram-16, Kerala, INDIA.*

[kms@iisertvm.ac.in](mailto:kms@iisertvm.ac.in)

## Table of contents

|                                                                     |     |                                             |     |
|---------------------------------------------------------------------|-----|---------------------------------------------|-----|
| 1. Materials and general procedures                                 | S3  | 29. COSY NMR of <b>3b</b>                   | S24 |
| 2. Synthesis and characterization of <b>3a</b>                      | S4  | 30. COSY NMR of <b>3b</b> (zoom)            | S25 |
| 3. Synthesis and characterization of <b>3b</b>                      | S4  | 31. HMQC NMR of <b>3b</b>                   | S26 |
| 4. Synthesis and characterization of <b>3c</b>                      | S5  | 32. HMQC NMR of <b>3b</b> (zoom)            | S27 |
| 5. Synthesis and characterization of <b>3d</b>                      | S5  | 33. <sup>13</sup> C NMR of <b>3b</b>        | S28 |
| 6. Synthesis and characterization of <b>3e</b>                      | S6  | 34. <sup>13</sup> C NMR of <b>3b</b> (zoom) | S29 |
| 7. Synthesis and characterization of <b>12</b>                      | S7  | 35. DEPT of <b>3b</b>                       | S30 |
| 8. Synthesis and characterization of <b>10</b>                      | S7  | 36. <sup>1</sup> H NMR of <b>3c</b>         | S31 |
| 9. Hydrolysis of <b>4</b> in wet MeOH                               | S8  | 37. <sup>1</sup> H NMR of <b>3c</b> (zoom)  | S32 |
| 10. Hydrolysis of <b>4</b> in dry DMF                               | S9  | 38. COSY NMR of <b>3c</b>                   | S33 |
| 11. Hydrolysis of <b>7</b>                                          | S9  | 39. COSY NMR of <b>3c</b> (zoom)            | S34 |
| 12. Hydrolysis of <b>8</b>                                          | S10 | 40. HMQC NMR of <b>3c</b>                   | S35 |
| 13. Hydrolysis of <b>9</b>                                          | S10 | 41. <sup>13</sup> C NMR of <b>3c</b>        | S36 |
| 14. Hydrolysis of <b>10</b>                                         | S10 | 42. <sup>13</sup> C NMR of <b>3c</b> (zoom) | S37 |
| 15. Hydrolysis of <b>12</b>                                         | S11 | 43. DEPT of <b>3c</b>                       | S38 |
| 16. Structural assignment of 2- <i>O</i> -esters                    | S12 | 44. <sup>1</sup> H NMR of <b>3d</b>         | S39 |
| 17. Reactivity comparison of H <sub>2</sub> SO <sub>4</sub> -silica | S13 | 45. <sup>1</sup> H NMR of <b>3d</b> (zoom)  | S40 |
| 18. Establishment of regioselectivity                               | S13 | 46. COSY NMR of <b>3d</b>                   | S41 |
| 19. References                                                      | S13 | 47. COSY NMR of <b>3d</b> (zoom)            | S42 |
| 20. <sup>1</sup> H NMR of <b>3a</b>                                 | S15 | 48. HMQC NMR of <b>3d</b>                   | S43 |
| 21. <sup>1</sup> H NMR of <b>3a</b> (zoom)                          | S16 | 49. <sup>13</sup> C NMR of <b>3d</b>        | S44 |
| 22. COSY NMR of <b>3a</b>                                           | S17 | 50. <sup>13</sup> C NMR of <b>3d</b> (zoom) | S45 |
| 23. HMQC NMR of <b>3a</b>                                           | S18 | 51. DEPT of <b>3d</b>                       | S46 |
| 24. <sup>13</sup> C NMR of <b>3a</b>                                | S19 | 52. <sup>1</sup> H NMR of <b>3e</b>         | S47 |
| 25. <sup>13</sup> C NMR of <b>3a</b> (zoom)                         | S20 | 53. <sup>1</sup> H NMR of <b>3e</b> (zoom)  | S48 |
| 26. DEPT of <b>3a</b>                                               | S21 | 54. COSY NMR of <b>3e</b>                   | S49 |
| 27. <sup>1</sup> H NMR of <b>3b</b>                                 | S22 | 55. HMQC NMR of <b>3e</b>                   | S50 |
| 28. <sup>1</sup> H NMR of <b>3b</b> (zoom)                          | S23 |                                             |     |

## Supplementary Information

|                                                                                  |     |                                                                    |     |
|----------------------------------------------------------------------------------|-----|--------------------------------------------------------------------|-----|
| 56. $^{13}\text{C}$ NMR of <b>3e</b>                                             | S51 | 68. $^1\text{H}$ NMR of <b>11</b> in $\text{CD}_3\text{OD}$ (zoom) | S63 |
| 57. DEPT of <b>3e</b>                                                            | S52 | 69. $^1\text{H}$ NMR of <b>11</b> in $\text{CD}_3\text{OD}$ (zoom) | S64 |
| 58. $^1\text{H}$ NMR of <b>11</b> in DMSO- $d_6$                                 | S53 | 70. $^{13}\text{C}$ NMR of <b>3a</b> + <i>myo</i> -inositol        | S65 |
| 59. $^1\text{H}$ NMR of <b>11</b> in DMSO- $d_6$ (zoom)                          | S54 | 71. $^{13}\text{C}$ of <b>3a</b> + <i>myo</i> -inositol (zoom)     | S66 |
| 60. $^1\text{H}$ NMR of <b>11</b> in DMSO- $d_6$ (zoom)                          | S55 | 72. $^1\text{H}$ NMR of <b>12</b>                                  | S67 |
| 61. COSY NMR of <b>11</b> in DMSO- $d_6$                                         | S56 | 73. $^1\text{H}$ NMR of <b>12</b> (zoom)                           | S68 |
| 62. COSY NMR of <b>11</b> in DMSO- $d_6$ (zoom)                                  | S57 | 74. COSY NMR of <b>12</b>                                          | S69 |
| 63. $^1\text{H}$ NMR of <b>11</b> in DMSO- $d_6$ ( $\text{D}_2\text{O}$ Exch)    | S58 | 75. $^{13}\text{C}$ NMR of <b>12</b>                               | S70 |
| 64. $^1\text{H}$ of <b>11</b> in DMSO- $d_6$ ( $\text{D}_2\text{O}$ Exch) (zoom) | S59 | 76. $^1\text{H}$ NMR of <b>10</b>                                  | S71 |
| 65. COSY of <b>11</b> in DMSO- $d_6$ ( $\text{D}_2\text{O}$ Exch)                | S60 | 77. $^1\text{H}$ NMR of <b>10</b> (zoom)                           | S72 |
| 66. COSY of <b>11</b> in DMSO- $d_6$ + $\text{D}_2\text{O}$ (zoom)               | S61 | 78. COSY NMR of <b>10</b>                                          | S74 |
| 67. $^1\text{H}$ NMR of <b>11</b> in $\text{CD}_3\text{OD}$                      | S62 | 79. $^{13}\text{C}$ NMR of <b>10</b>                               | S74 |

## Supplementary Information

### Materials and General Procedures

Chromatograms were visualized under UV light and by dipping plates into either phosphomolybdic acid in MeOH or anisaldehyde in ethanol, followed by heating. The  $^1\text{H}$  NMR, COSY, and HMQC spectra were recorded on a Bruker (500 MHz) NMR spectrometer. Proton chemical shifts are reported in ppm ( $\delta$ ) relative to internal tetramethylsilane (TMS,  $\delta$  0.0 ppm) or with the solvent reference relative to TMS employed as the internal standard ( $\text{CDCl}_3$ ,  $\delta$  7.26 ppm;  $\text{D}_2\text{O}$ ,  $\delta$  4.79 ppm). Data are reported as follows: chemical shift (multiplicity [singlet (s), doublet (d), triplet (t), quartet (q), and multiplet (m)], coupling constants [Hz], integration and peak identification). All NMR signals were assigned on the basis of  $^1\text{H}$  NMR,  $^{13}\text{C}$  NMR, COSY and HMQC experiments.  $^{13}\text{C}$  spectra were recorded with complete proton decoupling. Carbon chemical shifts are reported in ppm ( $\delta$ ) relative to TMS with the respective solvent resonance as the internal standard. All NMR data were collected at 25 °C. Melting points were determined using Stuart SMP30 melting point apparatus and are uncorrected. Flash column chromatography was performed using Silica Gel (200-400 mesh). All reactions were carried out under argon or nitrogen atmosphere employing oven dried glassware.

### Preparation of $\text{H}_2\text{SO}_4$ -silica

A slurry of 20 g of silica gel (200-400 mesh, FINAR make) with 150 mL of diethyl ether was made in a 250 mL RB flask. To this slurry, 1 mL of conc.  $\text{H}_2\text{SO}_4$  was added very slowly with vigorous shaking over a period of 30 min. The ether was evaporated under reduced pressure and the free flowing silica was heated at 120 °C in an oven for 1h. The resulting solid was kept under high vacuum at room temperature for 2h and was stored in a desiccator.

### General procedure for the synthesis of 2-*O*-acyl-*myo*-inositol

A mixture of *myo*-inositol (2 mmol) and trialkylorthoester (2.4 mmol) in dry DMF / DMSO (10 mL) was stirred in presence of  $\text{H}_2\text{SO}_4$ -silica (50 mg) at 70 °C for 6-12 h under argon atmosphere. The resulting solution was neutralized by adding solid  $\text{NaHCO}_3$ , filtered and washed successively with reaction solvent. The combined filtrate was evaporated under reduced pressure (freeze drying in case of DMSO). The residue obtained was chromatographed using isopropanol and ethyl acetate (1:9 v/v) to yield respective 2-*O*-acyl-*myo*-inositol.

## Supplementary Information

### Synthetic Procedures and Characterization

#### 2-O-benzoyl-*myo*-inositol (3a)

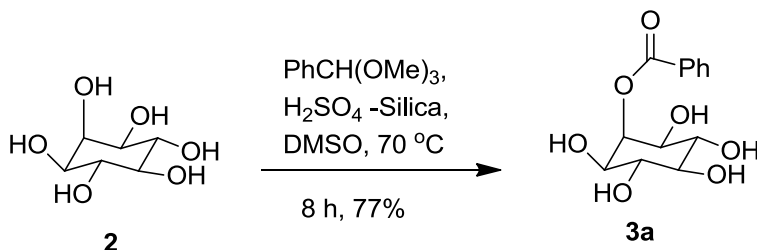

A mixture of *myo*-inositol **2** (0.36 g, 2 mmol) and trimethylorthobenzoate (0.42 mL, 2.4 mmol) in dry DMSO (10 mL) was stirred in presence of  $\text{H}_2\text{SO}_4$ -silica (50 mg) at 70 °C for 8 h under argon atmosphere. The resulting solution was neutralized by adding solid  $\text{NaHCO}_3$ , filtered and washed with DMSO. The DMSO was removed by freeze drying. The residue thus obtained was chromatographed using isopropanol and ethyl acetate (1:9 v/v) to yield compound **3a** (0.44 g, 77%) as a white solid.

mp: 232-234 °C.  $^1\text{H}$  NMR (500 MHz,  $\text{DMSO-d}_6$ )  $\delta$  7.96-7.94 (m, 2H, Ar-H), 7.66 (t,  $J$  = 7.3 Hz, 1H, Ar-H), 7.55 (t,  $J$  = 7.7 Hz, 2H, Ar-H), 5.44 (s, 1H, ), 4.91-4.79 (m, -OH), 3.49-3.15 (m, 4H), 3.06 (t,  $J$  = 6.4 Hz, H-5);  $^{13}\text{C}$  NMR (125 MHz,  $\text{DMSO-d}_6$ )  $\delta$  165.10, 132.93, 130.60, 129.14, 12.53, 75.75, 74.83, 73.21, 69.89. Elemental analysis: calcd for  $\text{C}_{13}\text{H}_{16}\text{O}_7$ : C, 54.93; H, 5.67%. Found: C, 54.76; H, 5.39%.

#### 2-O-pentanoyl-*myo*-inositol (3b)

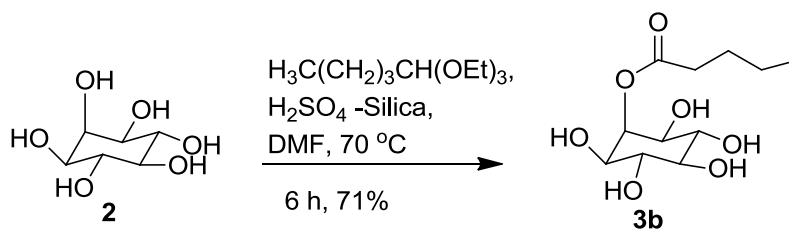

A mixture of *myo*-inositol (0.36 g, 2 mmol) and triethylorthovalerate (0.57 mL, 2.4 mmol) in dry DMF (10 mL) was stirred in presence of  $\text{H}_2\text{SO}_4$ -silica (50 mg) at 70 °C for 6 h under argon atmosphere. The resulting solution was neutralized by adding solid  $\text{NaHCO}_3$ , filtered and washed with DMF. The DMF was evaporated under reduced pressure. The residue thus obtained was chromatographed using isopropanol and ethyl acetate (1:9 v/v) to yield compound **3b** (0.37 g, 71%) as a white solid.



## Supplementary Information

mp: 155-157 °C.  $^1\text{H}$  NMR (500 MHz, DMSO- $d_6$ )  $\delta$  5.20 (t,  $J$  = 2.6 Hz, H-2), 4.73 (bs, -OH), 3.34-3.26 (m, 4H, Ins-H), 2.97 (t,  $J$  = 8.6 Hz, H-5), 2.28 (t,  $J$  = 7.3 Hz, 2H), 1.54-1.50 (m, 2H), 1.49-1.31 (m, 2H), 0.88 (t,  $J$  = 7.3 Hz, 3H);  $^{13}\text{C}$  NMR (125 MHz, DMSO- $d_6$ )  $\delta$  172.13, 74.80, 74.45, 73.00, 69.73, 33.65, 26.65, 21.54, 13.67. Elemental analysis: calcd for  $\text{C}_{11}\text{H}_{20}\text{O}_7$ : C, 49.99; H, 7.63%. Found: C, 49.83; H, 7.51%.

### 2-O-butanoyl-*myo*-inositol (3c)

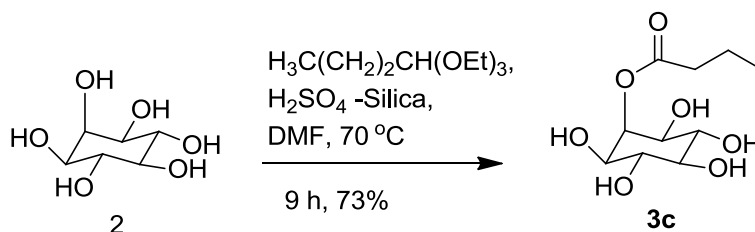

A mixture of *myo*-inositol (0.36 g, 2 mmol) and triethylorthobutyrate (0.52 mL, 2.4 mmol) in dry DMF (10 mL) was stirred in presence of  $\text{H}_2\text{SO}_4$ -silica (50 mg) at 70 °C for 9 h under argon atmosphere. The resulting solution was neutralized by adding solid  $\text{NaHCO}_3$ , filtered and washed with DMF. The DMF was evaporated under reduced pressure. The residue thus obtained was chromatographed using isopropanol and ethyl acetate (1:9 v/v) to yield compound **3c** (0.363 g, 73%) as a white solid.

mp: 158-160 °C.  $^1\text{H}$  NMR (500 MHz, DMSO- $d_6$ )  $\delta$  5.19 (t,  $J$  = 2.5 Hz, H-2), 4.70 (bs, -OH), 3.33-3.25 (m, 4H, Ins-H), 2.96 (t,  $J$  = 8.6 Hz, H-5), 2.24 (t,  $J$  = 7.2 Hz, 2H), 1.56-1.52 (m, 2H), 0.90 (t,  $J$  = 7.4 Hz, 3H);  $^{13}\text{C}$  NMR (125 MHz, DMSO- $d_6$ )  $\delta$  171.99, 74.83, 74.43, 73.03, 69.77, 35.89, 18.05, 13.47. Elemental analysis: calcd for  $\text{C}_{10}\text{H}_{18}\text{O}_7$ : C, 48.00; H, 7.25%. Found: C, 48.24; H, 7.43%.

### 2-O-propanoyl-*myo*-inositol (3d)

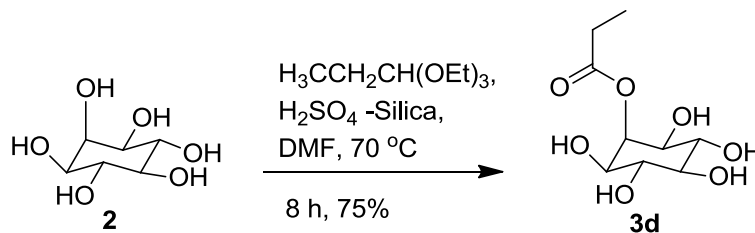

A mixture of *myo*-inositol (0.36 g, 2 mmol) and triethylorthopropionate (0.48 mL, 2.4 mmol) in dry DMF (10 mL) was stirred in presence of  $\text{H}_2\text{SO}_4$ -silica (50 mg) at 70 °C for 8 h under argon atmosphere. The resulting solution was neutralized by adding solid  $\text{NaHCO}_3$ , filtered and washed with DMF. The DMF was evaporated under reduced

## Supplementary Information

pressure. The residue thus obtained was chromatographed using isopropanol and ethyl acetate (1:9 v/v) to yield compound **3d** (0.349 g, 75%) as a white solid.

mp: 164-166 °C.  $^1\text{H}$  NMR (500 MHz, DMSO- $d_6$ )  $\delta$  5.19 (t,  $J$  = 2.6 Hz, H-2), 3.54 (bs, -OH), 3.33-3.27 (m, 4H, Ins-H), 2.97 (t,  $J$  = 8.5 Hz, H-5), 2.30 (q,  $J$  = 7.5 Hz, 2H), 1.03 (t,  $J$  = 7.5 Hz, 3H);  $^{13}\text{C}$  NMR (125 MHz, DMSO- $d_6$ )  $\delta$  173.00, 74.61, 74.46, 72.81, 69.61, 27.14, 9.06. Elemental analysis: calcd for  $\text{C}_9\text{H}_{16}\text{O}_7$ : C, 45.76; H, 6.83%. Found: C, 45.48; H, 6.91%.

### 2-O-acetyl-*myo*-inositol (3e)

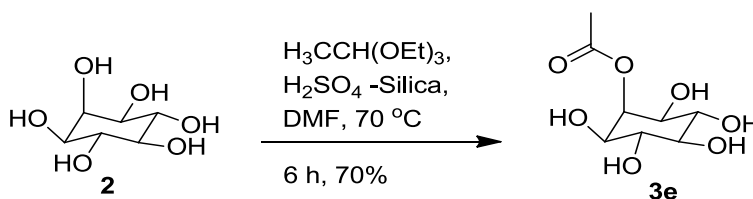

A mixture of *myo*-inositol (0.36 g, 2 mmol) and triethylorthoacetate (0.37 mL, 2.4 mmol) in dry DMF (10 mL) was stirred in presence of  $\text{H}_2\text{SO}_4$ -silica (50 mg) at 70 °C for 6 h under argon atmosphere. The resulting solution was neutralized by adding solid  $\text{NaHCO}_3$ , filtered and washed with DMF. The DMF was evaporated under reduced pressure. The residue obtained was chromatographed using isopropanol and ethyl acetate (1:9 v/v) to yield compound **3e** (0.31 g, 70%) as a white solid.

mp: 170-172 °C.  $^1\text{H}$  NMR (500 MHz, DMSO- $d_6$ )  $\delta$  5.18 (t,  $J$  = 2.5 Hz, H-2), 4.70 (bs, -OH), 3.33-3.27 (m, 4H, Ins-H), 2.97 (t,  $J$  = 8.5 Hz, H-5), 1.99 (s, 3H);  $^{13}\text{C}$  NMR (125 MHz, DMSO- $d_6$ )  $\delta$  169.69, 74.83, 74.68, 72.99, 69.76, 21.05. Elemental analysis: calcd for  $\text{C}_8\text{H}_{14}\text{O}_7$ : C, 43.24; H, 6.35%. Found: C, 43.11; H, 6.17%.

### 2-O-formyl-*myo*-inositol (3f)

A mixture of *myo*-inositol (0.36 g, 2 mmol) and triethylorthoformate (0.42 mL, 2.4 mmol) in dry DMF (10 mL) was stirred in presence of  $\text{H}_2\text{SO}_4$ -silica (50 mg) at 70 °C for 6 h under argon atmosphere. A major spot ( $R_f$  0.15, isopronaol: ethylacetate 1:9 v/v) was observed just above the *myo*-inositol. The resulting solution was neutralized by adding solid  $\text{NaHCO}_3$  and the filtrate was evaporated. However, during the filtration and chromatography the labile formate ester got hydrolyzed to the inositol.<sup>[1]</sup>

## Supplementary Information

### Myo-inositol-4,6-O-sulfite-1,3,5-orthobenzoate (12)

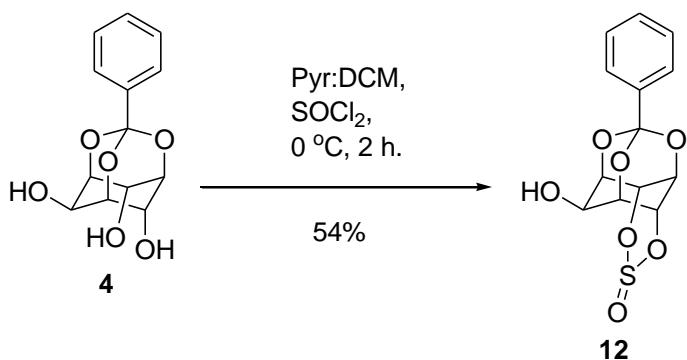

To a solution of *myo*-inositol-1,3,5-orthobenzoate<sup>[2]</sup> (0.11 g, 0.41 mmol) in a mixture of pyridine and dichloromethane (1:4, v/v, 10 mL) was added thionylchloride (0.04 mL, 0.49 mmol) drop wise at 0 °C. The reaction was stirred at 0 °C for 2 h. After the completion of starting material (checked by TLC), the reaction mixture was concentrated under reduced pressure. The residue was co-evaporated with toluene to dryness. The resulting residue was adsorbed on silica by dissolving it into dichloromethane. The crude product was purified by column chromatography using ethyl acetate and petroleum ether (1:4, v/v) to yield **12** (0.08 g, 54 %) as a white solid.

mp: 115-117 °C. <sup>1</sup>H NMR (500 MHz, CDCl<sub>3</sub>) δ 7.56-7.54 (m, 2H, Ar-*H*), 7.36-7.31 (m, 3H, Ar-*H*), 5.84 (t, *J* = 4.2 Hz, 1H, H-5), 5.22 (t, *J* = 4.5 Hz, 2H, H-4 & H-6), 4.46 (dd, *J* = 2.85 and 1.60 Hz, 2H, H-1 & H-3), 4.14 (bs, 1H, H-2); <sup>13</sup>C NMR (125 MHz, CDCl<sub>3</sub>) δ 135.51, 130.22, 128.25, 125.22, 107.31, 72.52, 68.55, 60.70, 60.27. Elemental analysis: calcd for C<sub>13</sub>H<sub>12</sub>O<sub>7</sub>S: C, 50.00; H, 3.87; S, 10.27%. Found: C, 50.18; H, 3.79; S, 10.42%.

### 4-O-benzoyl-myio-inositol 1,3,5-orthobenzoate (10)

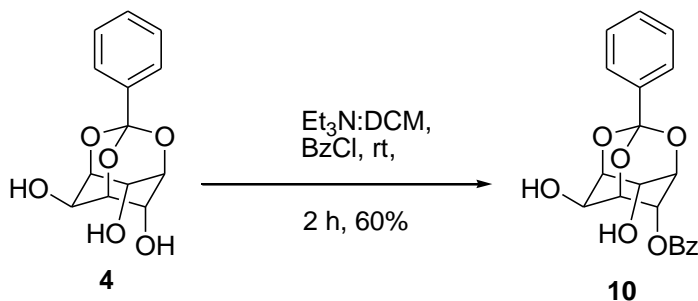

## Supplementary Information

To a solution of *myo*-inositol-1,3,5-orthobenzoate (0.180 g, 0.67 mmol) in a mixture of triethylamine and dichloromethane (1:4, v/v, 10 mL) benzoyl chloride (0.09 mL, 0.74 mmol) was added drop wise at 0 °C. The reaction was allowed to stir at rt for 2 h. After the completion of starting material (checked by TLC), the reaction mixture was concentrated under reduced pressure. The residue was dissolved in dichloromethane (20 mL) and washed successively with water (3 x 10 mL) and brine (10 mL). The organic layer was dried over anhydrous Na<sub>2</sub>SO<sub>4</sub> and concentrated under reduced pressure. The crude product was purified by column chromatography using ethyl acetate and petroleum ether (1:4, v/v) to yield **10** (0.145 g, 60 %) as a white solid.

mp: 135-137 °C. <sup>1</sup>H NMR (500 MHz, CDCl<sub>3</sub>) δ 7.94-7.92 (m, 2H, Ar-*H*), 7.61-7.59 (m, 2H, Ar-*H*), 7.54 (t, *J* = 7.5 Hz, 1H, Ar-*H*), 7.39 (t, *J* = 7.5 Hz, 2H, Ar-*H*), 7.33-7.31 (m, 3H, Ar-*H*), 5.87-5.86 (m, 1H, H-4), 4.73 (bs, 1H, H-6), 4.58-4.57 (m, 1H, H-5), 4.50 (dd, *J* = 3.90 and 1.80 Hz, 1H, H-3), 4.39 (dd, *J* = 3.90 and 1.90 Hz, 1H, H-1), 4.22 (bs, 1H, H-2); <sup>13</sup>C NMR (125 MHz, CDCl<sub>3</sub>) δ 165.03, 136.40, 133.83, 129.88, 129.81, 128.91, 128.74, 128.18, 125.30, 107.80, 75.62, 73.31, 69.05, 68.59, 67.35, 60.29. Elemental analysis: calcd for C<sub>20</sub>H<sub>18</sub>O<sub>7</sub>: C, 64.86; H, 4.90%. Found: C, 64.63; H, 4.87%.

### Hydrolysis of *myo*-inositol 1,3,5-orthobenzoate (**4**) in wet methanol

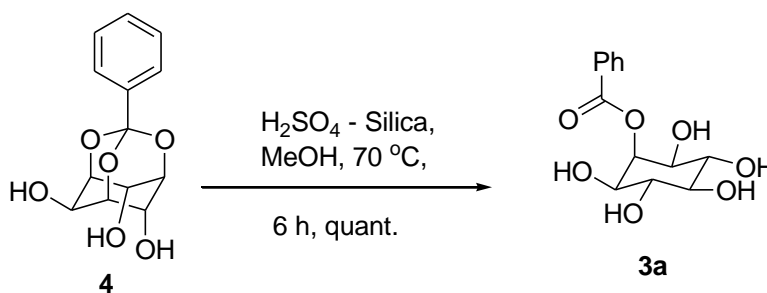

A mixture of *myo*-inositol-1,3,5-orthobenzoate (0.05 g, 0.18 mmol) and H<sub>2</sub>SO<sub>4</sub>-silica (20 mg) in methanol (5 mL) was stirred at 70 °C. The reaction was monitored by TLC. When the reaction was complete (6 h), the reaction mixture was neutralized by adding solid NaHCO<sub>3</sub>, filtered and washed with MeOH (10 mL). The MeOH was evaporated under reduced pressure. The residue thus obtained was chromatographed using isopropanol and ethyl acetate (1:9, v/v) to yield compound **3a** (0.045 g, quant) as a white solid.

## Supplementary Information

### Hydrolysis of *myo*-inositol 1,3,5-orthobenzoate (4) in dry DMF and 3 equiv of methanol

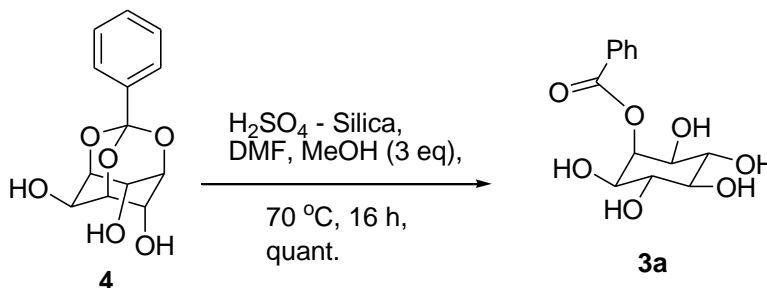

A mixture of *myo*-inositol-1,3,5-orthobenzoate (0.05 g, 0.18 mmol), dry methanol (22  $\mu\text{L}$ , 0.54 mmol, 3 eq) and  $\text{H}_2\text{SO}_4$ -silica (20 mg) in dry DMF (5 mL) was stirred at  $70\text{ }^\circ\text{C}$  under argon atmosphere. The reaction was monitored by TLC. When the reaction was complete (16 h), the reaction mixture was neutralized by adding solid  $\text{NaHCO}_3$ , filtered and washed with MeOH (10 mL). The solvents were evaporated under reduced pressure. The residue thus obtained was chromatographed using isopropanol and ethyl acetate (1:9, v/v) to yield compound 3a (0.045 g, quant) as a white solid.

### Hydrolysis of 2-*O*-benzoyl-*myo*-inositol 1,3,5-orthobenzoate (7)

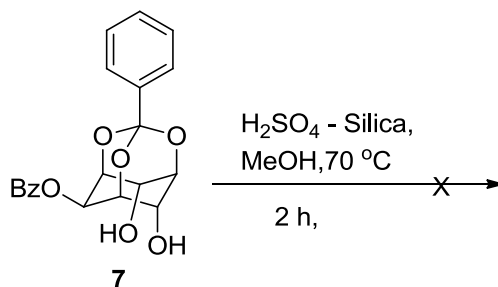

To a solution of 2-*O*-benzoyl-*myo*-inositol 1,3,5-orthobenzoate<sup>[3]</sup> (0.05 g, 0.13 mmol) in methanol (5 mL) was added  $\text{H}_2\text{SO}_4$ -silica (20 mg) and stirred the reaction at  $70\text{ }^\circ\text{C}$  for 2 h. There was no change in starting material as judged by TLC. The reaction was further heated to  $80\text{ }^\circ\text{C}$  for 12 h. There was no change in reaction mixture and the starting material could be recovered.

## Supplementary Information

### Hydrolysis of 2,4-di-*O*-benzoyl-*myo*-inositol 1,3,5-orthobenzoate (8)

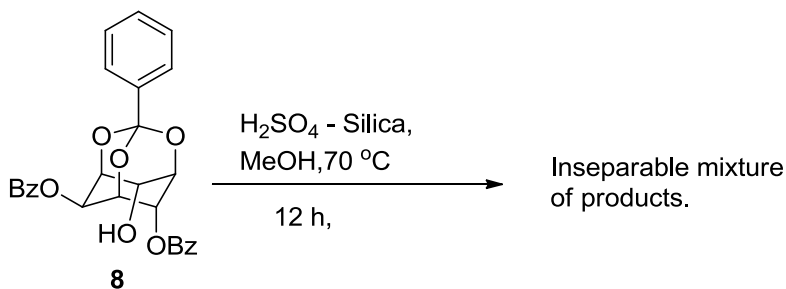

To a solution of 2,4-di-*O*-benzoyl-*myo*-inositol 1,3,5-orthobenzoate<sup>[3]</sup> (0.05 g, 0.10 mmol) in methanol (5 mL), H<sub>2</sub>SO<sub>4</sub>-silica (20 mg) was added and the mixture was stirred at 70 °C for 12 h. There was no reaction as judged by TLC. However, an inseparable mixture of high polar products was obtained when the reaction was heated to 80 °C for 60 h.

### Hydrolysis of 2,4,6-tri-*O*-benzoyl-*myo*-inositol 1,3,5-orthobenzoate (9)

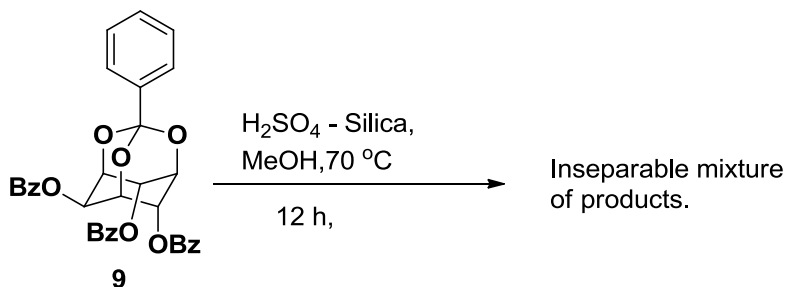

To a solution of 2,4,6-tri-*O*-benzoyl-*myo*-inositol 1,3,5-orthobenzoate<sup>[3]</sup> (0.05 g, 0.086 mmol) in methanol (5 mL), H<sub>2</sub>SO<sub>4</sub>-silica (20 mg) was added and the mixture was stirred at 70 °C for 12 h. There was no change in starting material as judged by TLC. As in the case of dibenzoate, an inseparable mixture of products was obtained when the reaction was done at higher temperature (80 °C) for several four days.

### Hydrolysis of 4-*O*-benzoyl-*myo*-inositol 1,3,5-orthobenzoate (10)

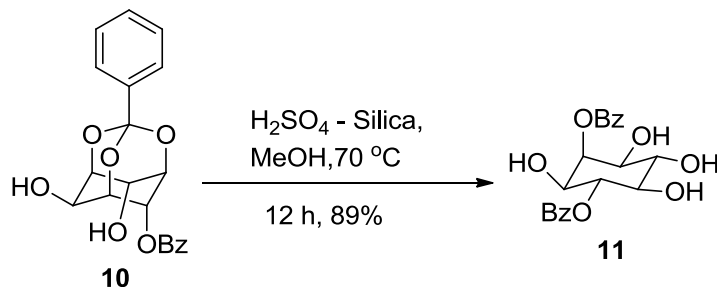

## Supplementary Information

To a solution of 4-*O*-benzoyl-*myo*-inositol 1,3,5-orthobenzoate (0.15 g, 0.4 mmol) in methanol (10 mL), H<sub>2</sub>SO<sub>4</sub>-silica (50 mg) was added and the mixture was stirred at 70 °C. The reaction was monitored by TLC. When the reaction was complete (12 h), it was quenched by adding solid NaHCO<sub>3</sub>. The resulting mixture was filtered and washed with methanol. The solvent was evaporated under reduced pressure. The crude product was purified by flash chromatography using ethyl acetate and petroleum ether (9:1, v/v) as the eluent to get the known<sup>4</sup> compound **11** (0.14 g, 89%) as a white solid. The <sup>1</sup>H NMR of **11** was reported in CD<sub>3</sub>OD. We have compared the NMR data of our sample in CD<sub>3</sub>OD with the reported data and found that they are identical. However, we observed that dibenzoate **11** underwent some transesterification in CD<sub>3</sub>OD to give minor amounts of impurities (See <sup>1</sup>H NMR spectrum on page No. S62). But dibenzoate **11** was stable in DMSO-d<sub>6</sub> solution. So we have recorded the <sup>1</sup>H NMR spectrum of **11** in DMSO-d<sub>6</sub> to establish its purity. Also a COSY NMR was done to assign the peaks.

### Reported data<sup>4</sup>

mp: 193-195 °C, <sup>1</sup>H NMR (500 MHz, CD<sub>3</sub>OD) δ 8.14-7.43 (m, 10H, 2Ph), 5.75 (app. t, *J* = 2.8 Hz, 1H, H-2), 5.53 (app. t, *J* = 9.9 Hz, 1H, H-4), 4.01 (dd, *J* = 10.1 Hz & 2.8 Hz, 1H, H-3), 3.85 (app. t, *J* = 9.5 Hz, 1H, H-6), 3.73 (dd, *J* = 9.8 Hz & 2.7 Hz, 1H, H-1), 3.60 (app. t, *J* = 9.4 Hz, 1H, H-5).

### Data obtained

mp: 194 °C, <sup>1</sup>H NMR (500 MHz, CD<sub>3</sub>OD) δ 8.03 (d, *J* = 7.3 Hz, 2H, Ar-H), 7.98 (d, *J* = 7.3 Hz, 2H, Ar-H), 7.54-7.47 (m, 2H, Ar-H), 7.43-7.35 (m, 4H, Ar-H), 5.65 (t, *J* = 2.8 Hz, 1H, H-2), 5.44 (t, *J* = 9.9 Hz, 1H, H-4), 3.92 (dd, *J* = 10.1 Hz & 2.8 Hz, 1H, H-3), 3.76 (t, *J* = 9.6 Hz, 1H, H-6), 3.64 (dd, *J* = 9.8 Hz & 2.8 Hz, 1H, H-1), 3.51 (t, *J* = 9.4 Hz, 1H, H-5).

<sup>1</sup>H NMR (500 MHz, DMSO-d<sub>6</sub>) δ 8.03-7.98 (m, 4H, Ar-H), 7.71-7.52 (m, 6H, Ar-H), 5.53 (t, *J* = 2.5 Hz, 1H, H-2), 5.32-5.28 (m, 2H, H-4, 3-OH), 5.16 (d, *J* = 5.6 Hz, 5-OH), 5.09-5.04 (m, 2H, 1-OH, 6-OH), 3.92-3.88 (m, 1H, H-3), 3.63-3.58 (m, 2H, H-1, H-6), 3.46-3.43 (m, 1H, H-5).

### Hydrolysis of *myo*-inositol-4,6-*O*-sulfite-1,3,5-orthobenzoate (**12**)

## Supplementary Information

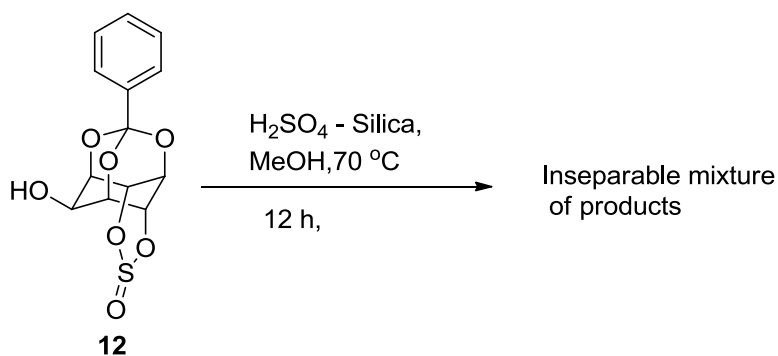

A mixture of *myo*-inositol-4,6-*O*-sulfite-1,3,5-orthobenzoate (0.05 g, 0.16 mmol) and  $\text{H}_2\text{SO}_4$ -silica (20 mg) in methanol (5 mL) was stirred at  $70\text{ }^\circ\text{C}$  for 12 h. There was no change in starting material as judged by TLC. But prolonged (4 days) heating at  $80\text{ }^\circ\text{C}$  resulted in the formation of an inseparable mixture of products.

### Structural Assignment of 2-*O*-esters

*Myo*-inositol being a meso compound with a plane of symmetry through C2 and C5 (see figure below), esterification of C2-OH or C5-OH gives a meso product and hence a symmetrical NMR spectrum with four signals in the ratio 1:2:2:1 and monoesterification at any other hydroxyl will result in an unsymmetrical product (hence unsymmetrical spectra).  $^{13}\text{C}$  NMR of all the monoesters obtained from  $\text{H}_2\text{SO}_4$ -silica catalyzed reaction between *myo*-inositol and trialkylorthoester revealed that they are symmetrical compounds. Since H-2 is an equatorially oriented hydrogen flanked by two axially oriented hydrogens on neighboring carbons (dihedral angle  $\phi$  around  $60^\circ$ ), its  $^3J_{\text{HH}}$  coupling constants will be small. As H-5 is an axial hydrogen flanked by two axial hydrogens (dihedral angle  $\phi$  around  $180^\circ$ ), its  $^3J_{\text{HH}}$  coupling constants will be higher. H of  $-\text{CH}(\text{OH})-$  motif will shift downfield on esterification of the OH and hence it is easy to determine the position of esterification. The most downfield shifted hydrogen ( $\delta > 5.2$  ppm; as a result of esterification) in all these monoesters (**3a-e**), showed a smaller coupling constant of  $\approx 2.6$  Hz suggesting that 2-OH is acylated and the other lone proton (upfield) showed a large coupling constant of  $\approx 8.6$  Hz (H-5) confirming that 5-OH is not acylated. These signal assignments were further confirmed by 2D NMR.



## Supplementary Information

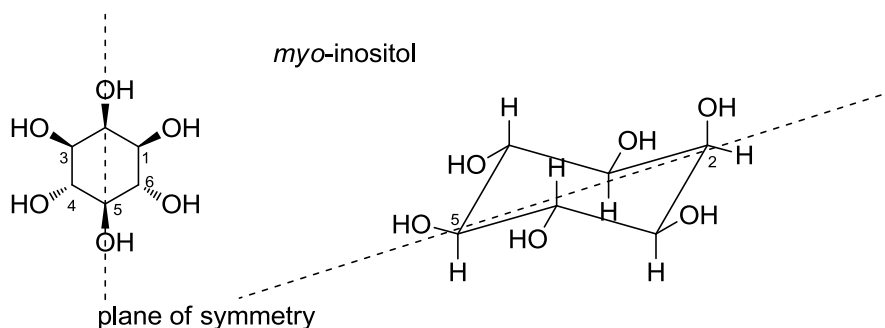

### **Reactivity comparison of H<sub>2</sub>SO<sub>4</sub>-silica with other acid catalysts**

Treatment of *myo*-inositol with trialkylorthoesters in presence of acid catalysts such as PTSA,<sup>5</sup> Camphorsulfonic acid,<sup>6</sup> Amberlyst<sup>7</sup> and triflic acid<sup>8</sup> have been reported to yield *myo*-inositol 1,3 5-orthoesters in good yields. We have reproduced some of these results in our own lab several times and in all the cases, we got only the corresponding orthoesters but not the 2-O-ester. Thus H<sub>2</sub>SO<sub>4</sub>-silica is a special case wherein the corresponding 2-O-ester is formed regioselectively instead of the orthoesters.

### **Establishment of regioselectivity**

The <sup>13</sup>C NMR of the crude reaction mixture showed minor amounts of inositol along with the major 2-O-esters. In order to prove that the minor impurity was not any other isomeric ester but just inositol, we have added *myo*-inositol to a pure sample of **3a** (approximately 1:1 ratio) and recorded its <sup>13</sup>C NMR. A comparison of this mixed NMR spectrum with <sup>13</sup>C NMR spectrum of the crude reaction mixture established that the minor impurity in the crude mixture is just inositol.

## References

- [1] S. W. Garret, C. Liu, A. M. Riley, B. V. L. Potter, *J. Chem. Soc. Perkin Trans. 1*, **1998**, 1367-1368.
- [2] G. Bhosekar, C. Murali, R. G. Gonnade, M. S. Shashidhar, M. M. Bhadbhade, *Crystal Growth & Design* **2005**, 5, 1977-1982.
- [3] C. Murali, R. G. Gonnade, M. S. Shashidhar, M. M. Bhadbhade, *Eur. J. Org. Chem.* **2007**, 1153–1159.
- [4] S-K. Chung, *et al. J. Org. Chem.* **2002**, 67, 5626-5637.
- [5] H. W. Lee and Y. Kishi. *J. Org. Chem.* **1985**, 50, 4402-4404.
- [6] M. A. Biamonte and A. Vasella, *Helv. Chem. Acta.* **1998**, 81, 4, 688-694.

## Supplementary Information

- [7] A. Krief, W. Dumont, D. Billen, J. J. Leteson, P. Lestrade, P. J. Murphy and D. Lacroix *Tetrahedron Lett.* **2004**, 45, 1461-1463.
- [8] P. Andersch and M. P. Schneider, *Tetrahedron Asym.* **1993**, 4, 2135-2138.

# Supplementary Information

## <sup>1</sup>H NMR of **3a** in DMSO- d<sub>6</sub>

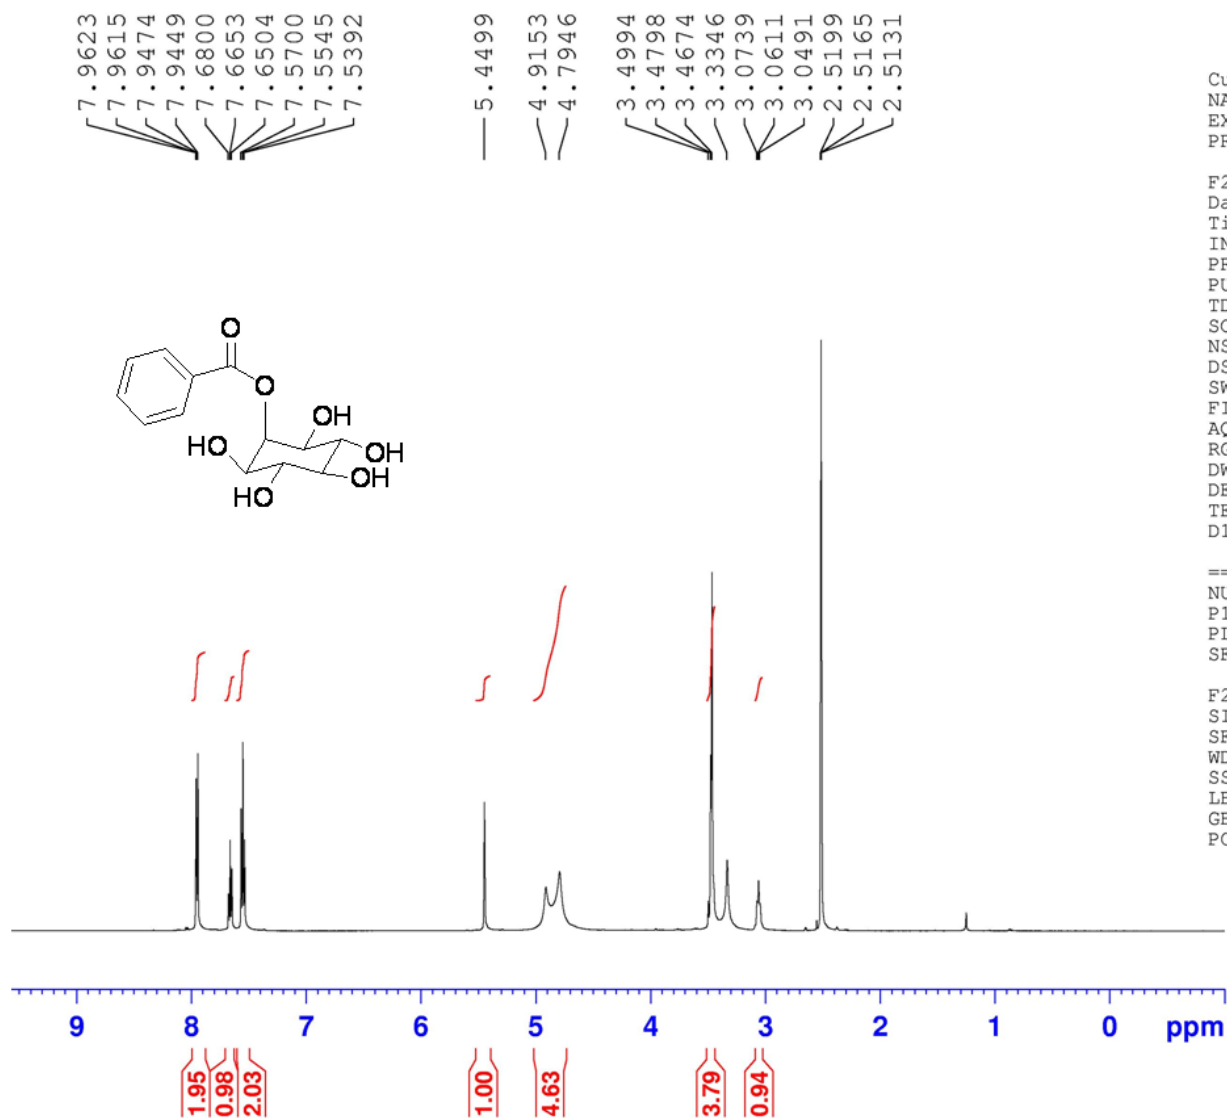

Current Data Parameters  
NAME Amol  
EXPNO 249  
PROCNO 1

F2 - Acquisition Parameters  
Date\_ 20111118  
Time 13.37  
INSTRUM spect  
PROBHD 5 mm PABBO BB-  
PULPROG zg30  
TD 65536  
SOLVENT DMSO  
NS 128  
DS 2  
SWH 10330.578 Hz  
FIDRES 0.157632 Hz  
AQ 3.1719923 sec  
RG 153.65  
DW 48.400 usec  
DE 6.50 usec  
TE 298.0 K  
D1 1.00000000 sec

===== CHANNEL f1 =====  
NUC1 1H  
P1 9.04 usec  
PLW1 27.16399956 W  
SFO1 500.2330891 MHz

F2 - Processing parameters  
SI 65536  
SF 500.2300000 MHz  
WDW EM  
SSB 0  
LB 0.30 Hz  
GB 0  
PC 1.00

# Supplementary Information

## <sup>1</sup>H NMR of **3a** (zoom)

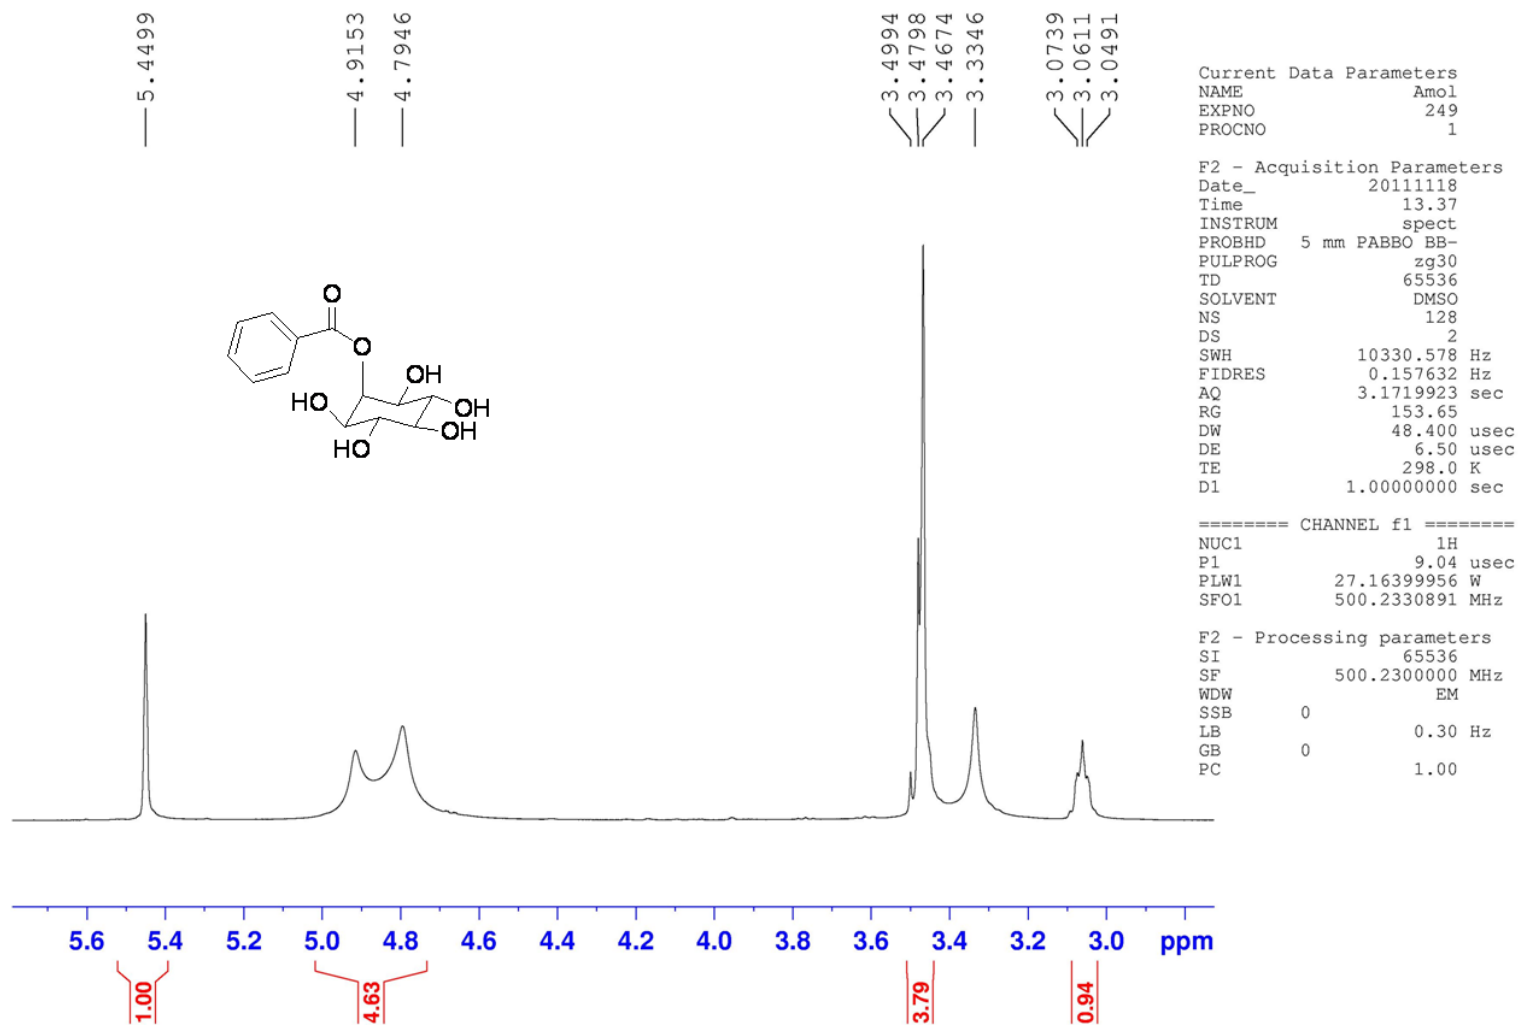

# Supplementary Information

## COSY of 3a

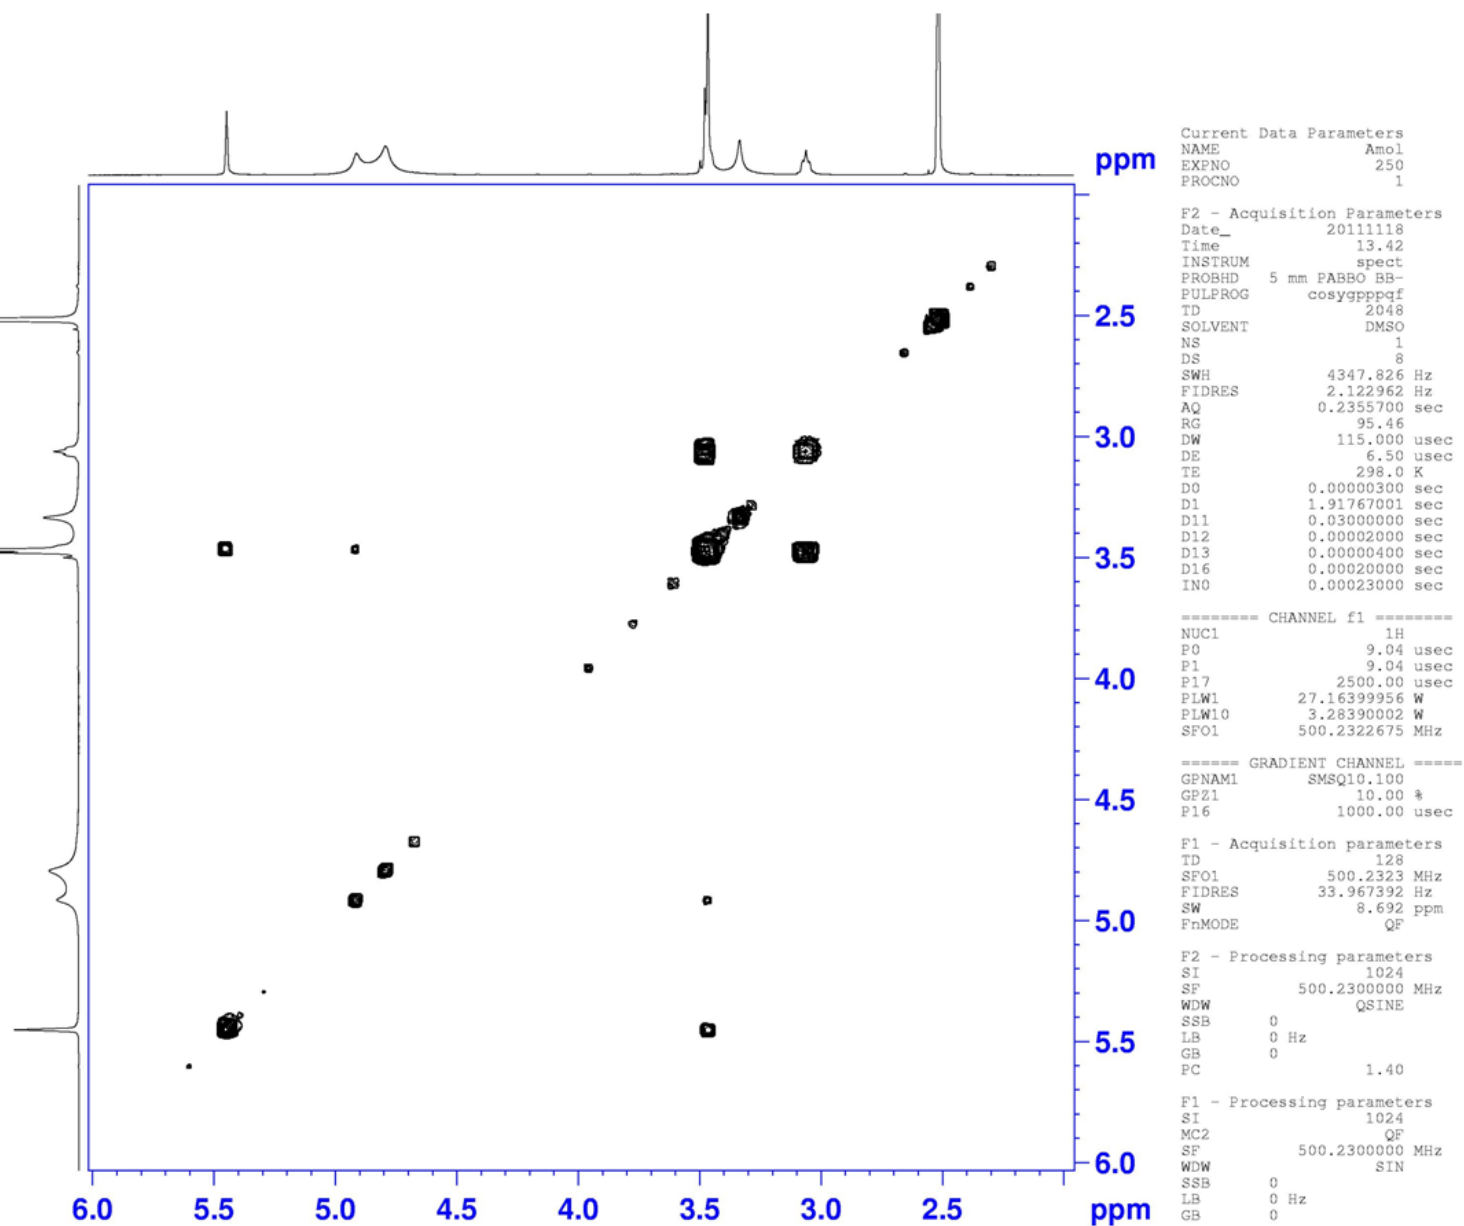

# Supplementary Information

## HMQC of 3a

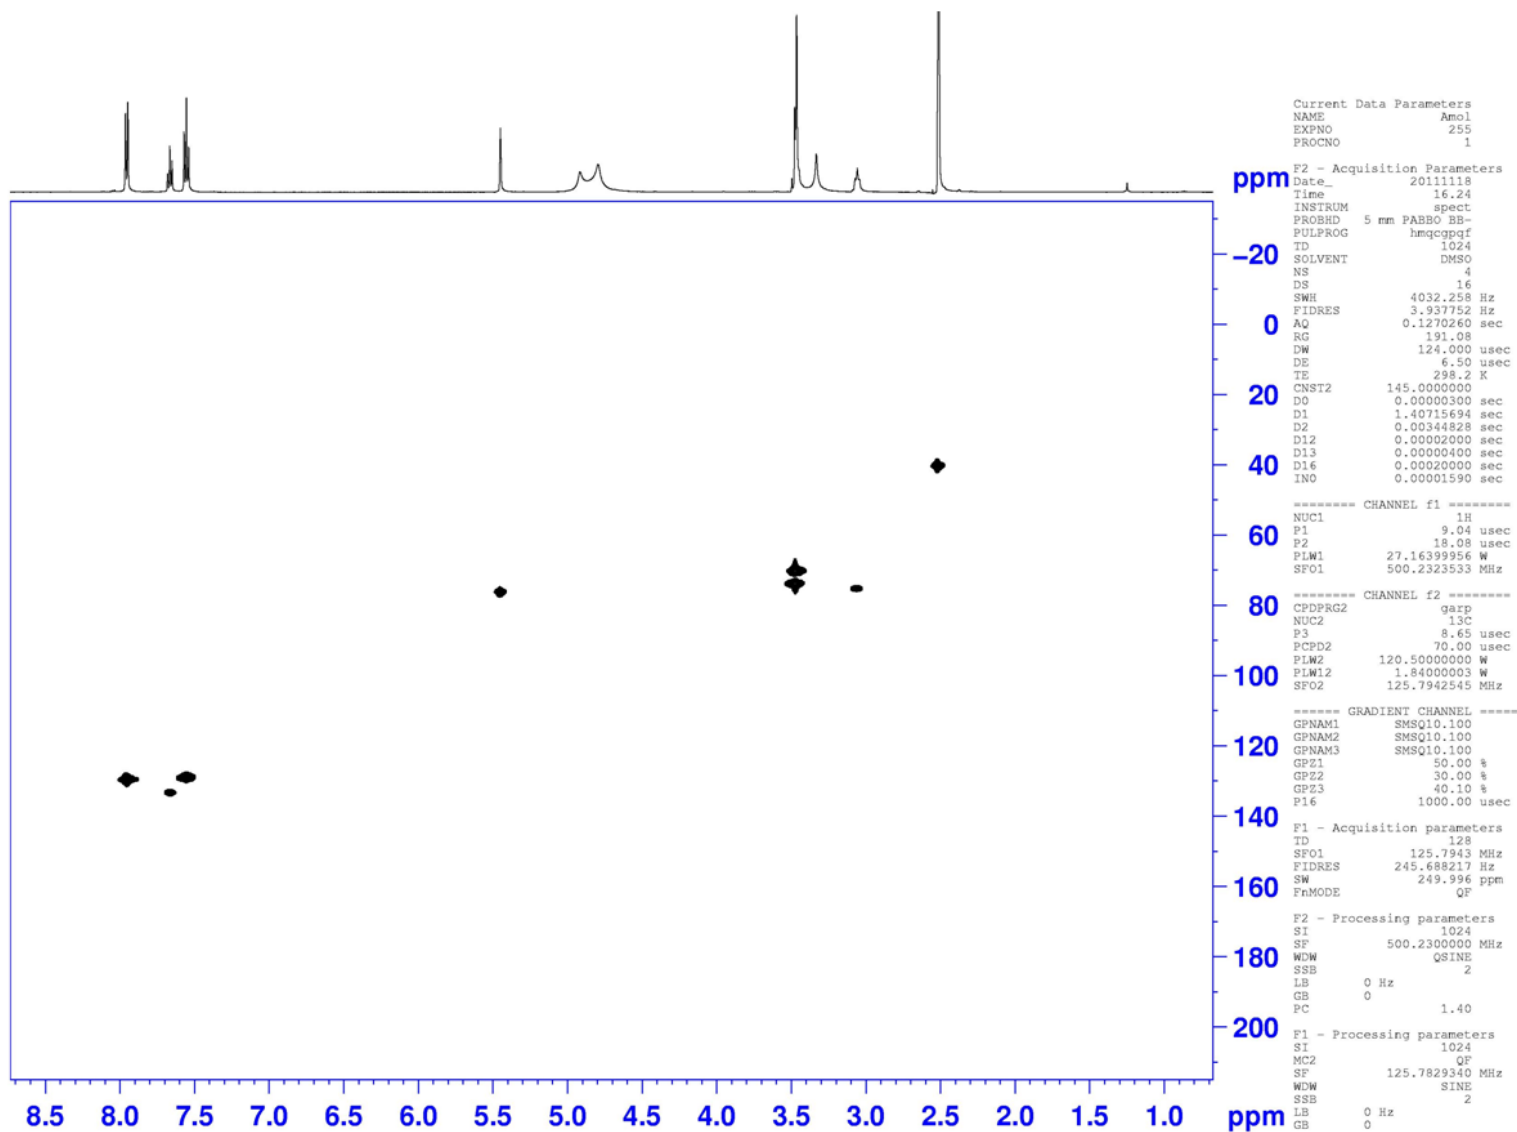

# Supplementary Information

## <sup>13</sup>C NMR of **3a** in DMSO-d<sub>6</sub>

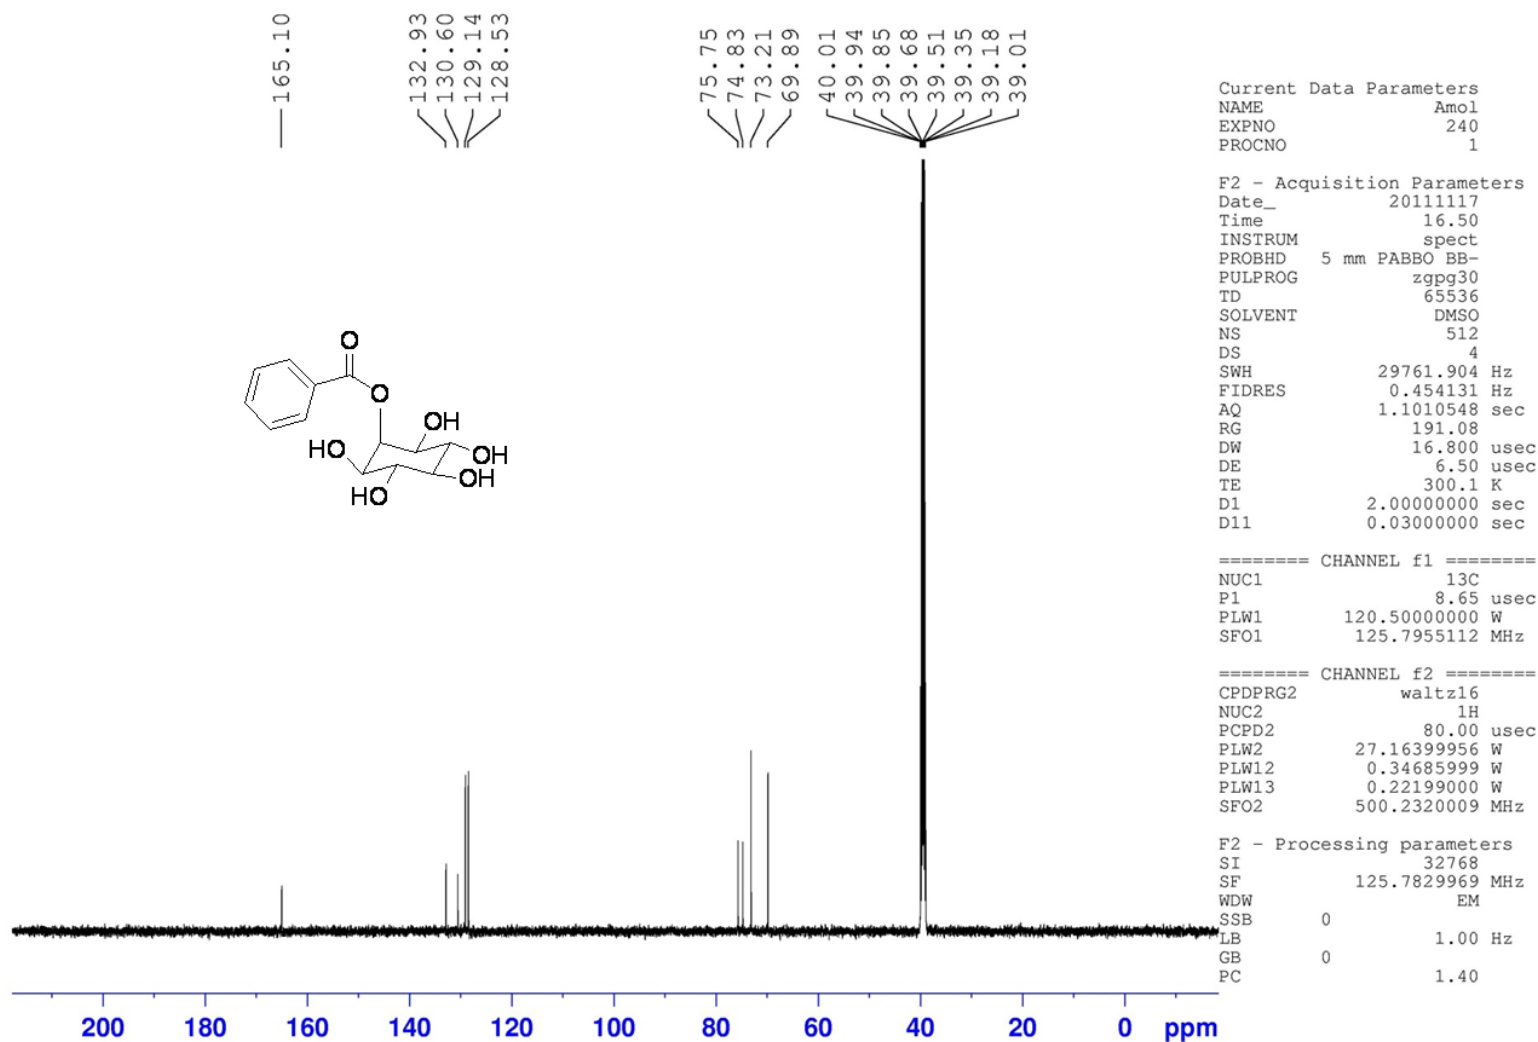

# Supplementary Information

## <sup>13</sup>C NMR of **3a** (zoom)

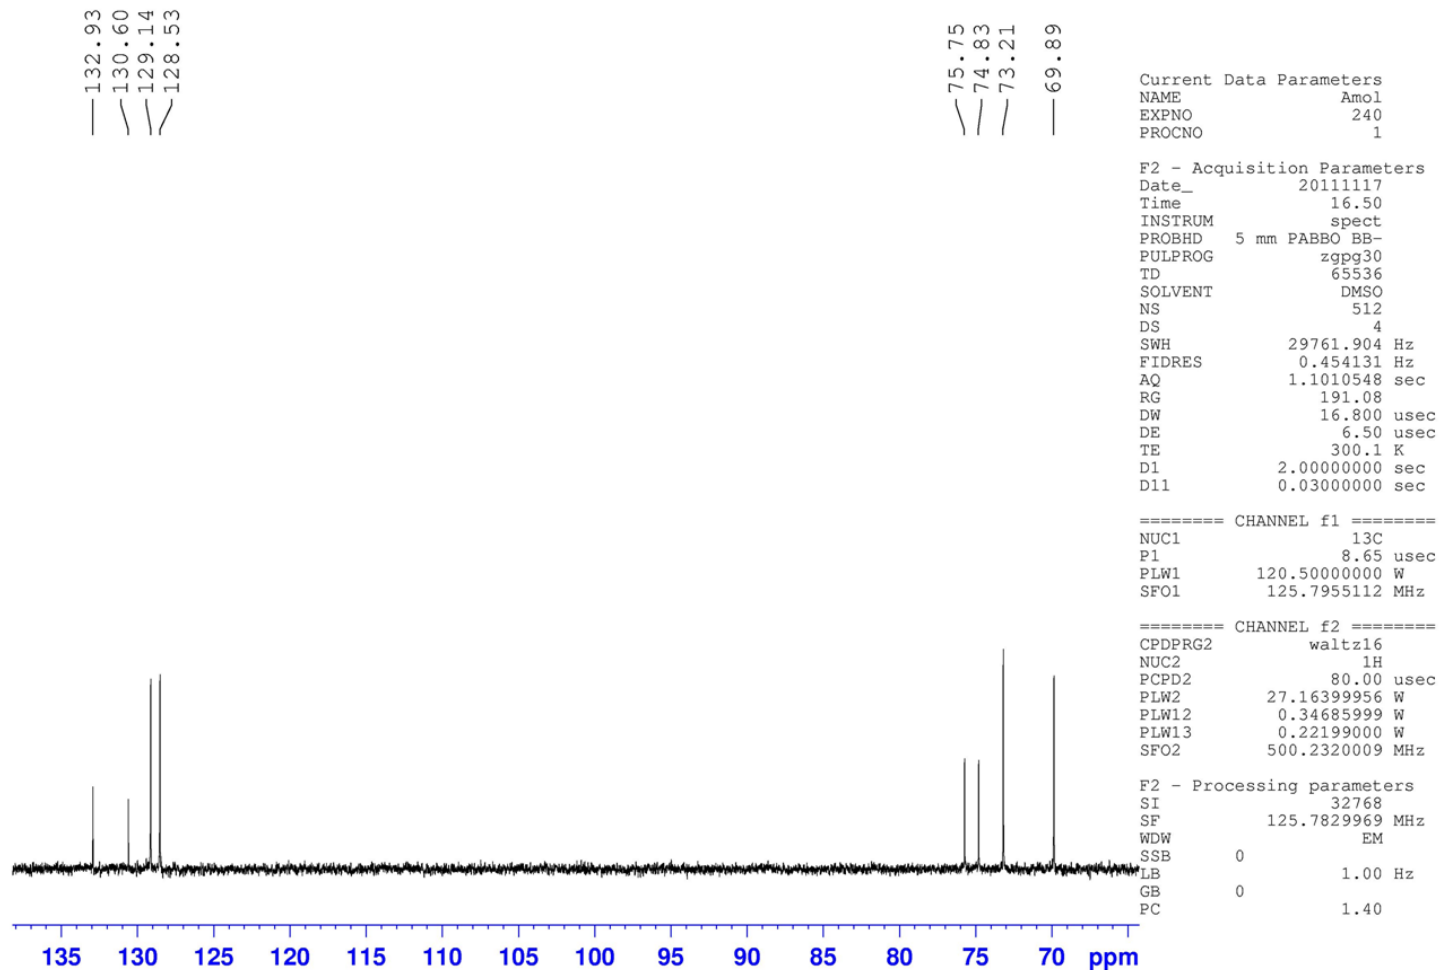



# Supplementary Information

## DEPT of 3a

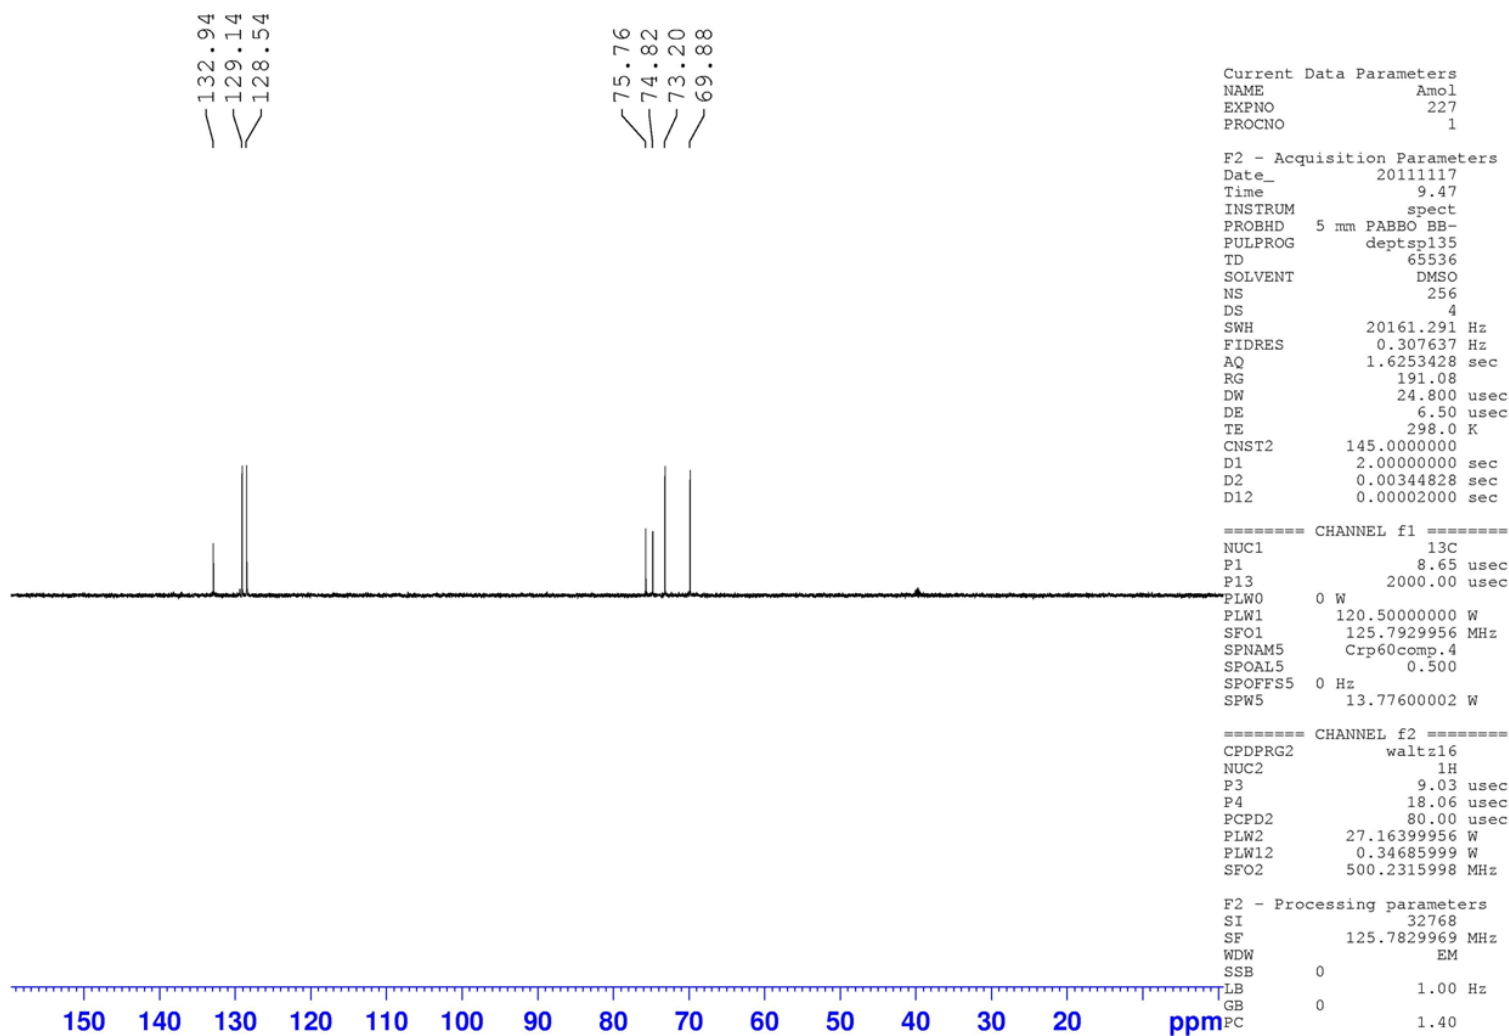

# Supplementary Information

$^1\text{H}$  NMR of **3b** in  $\text{DMSO-d}_6$

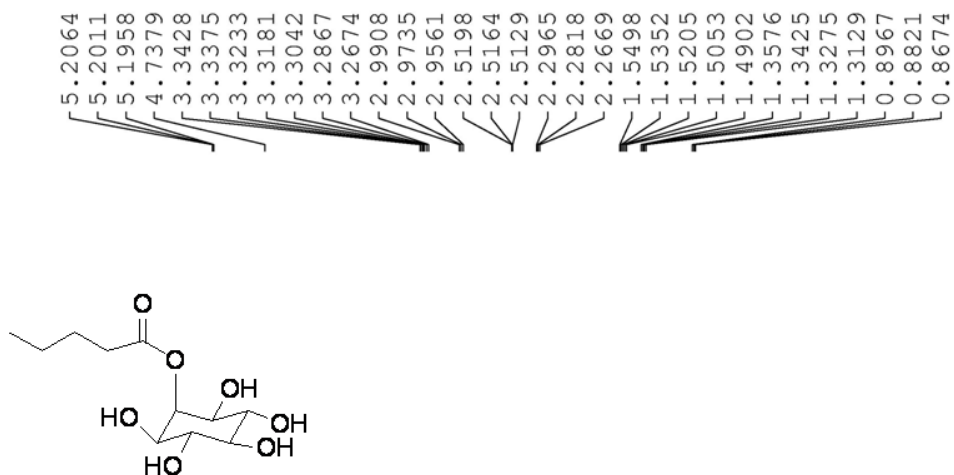

Current Data Parameters  
NAME Amol  
EXPNO 198  
PROCNO 1

F2 - Acquisition Parameters  
Date\_ 20111114  
Time 0.51  
INSTRUM spect  
PROBHD 5 mm PABBO BB-  
PULPROG zg30  
TD 65536  
SOLVENT DMSO  
NS 64  
DS 2  
SWH 10330.578 Hz  
FIDRES 0.157632 Hz  
AQ 3.1719923 sec  
RG 107.19  
DW 48.400 usec  
DE 6.50 usec  
TE 295.5 K  
D1 1.00000000 sec

===== CHANNEL f1 =====  
NUC1 1H  
P1 9.04 usec  
PLW1 27.16399956 W  
SFO1 500.2330891 MHz

F2 - Processing parameters  
SI 65536  
SF 500.2300000 MHz  
WDW EM  
SSB 0  
LB 0.30 Hz  
GB 0  
PC 1.00

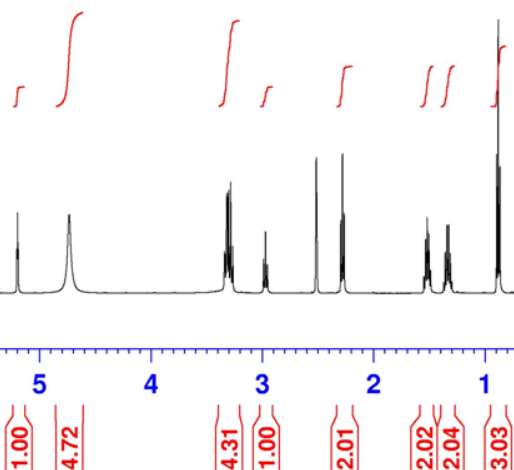

# Supplementary Information

## <sup>1</sup>H NMR of **3b** (zoom)

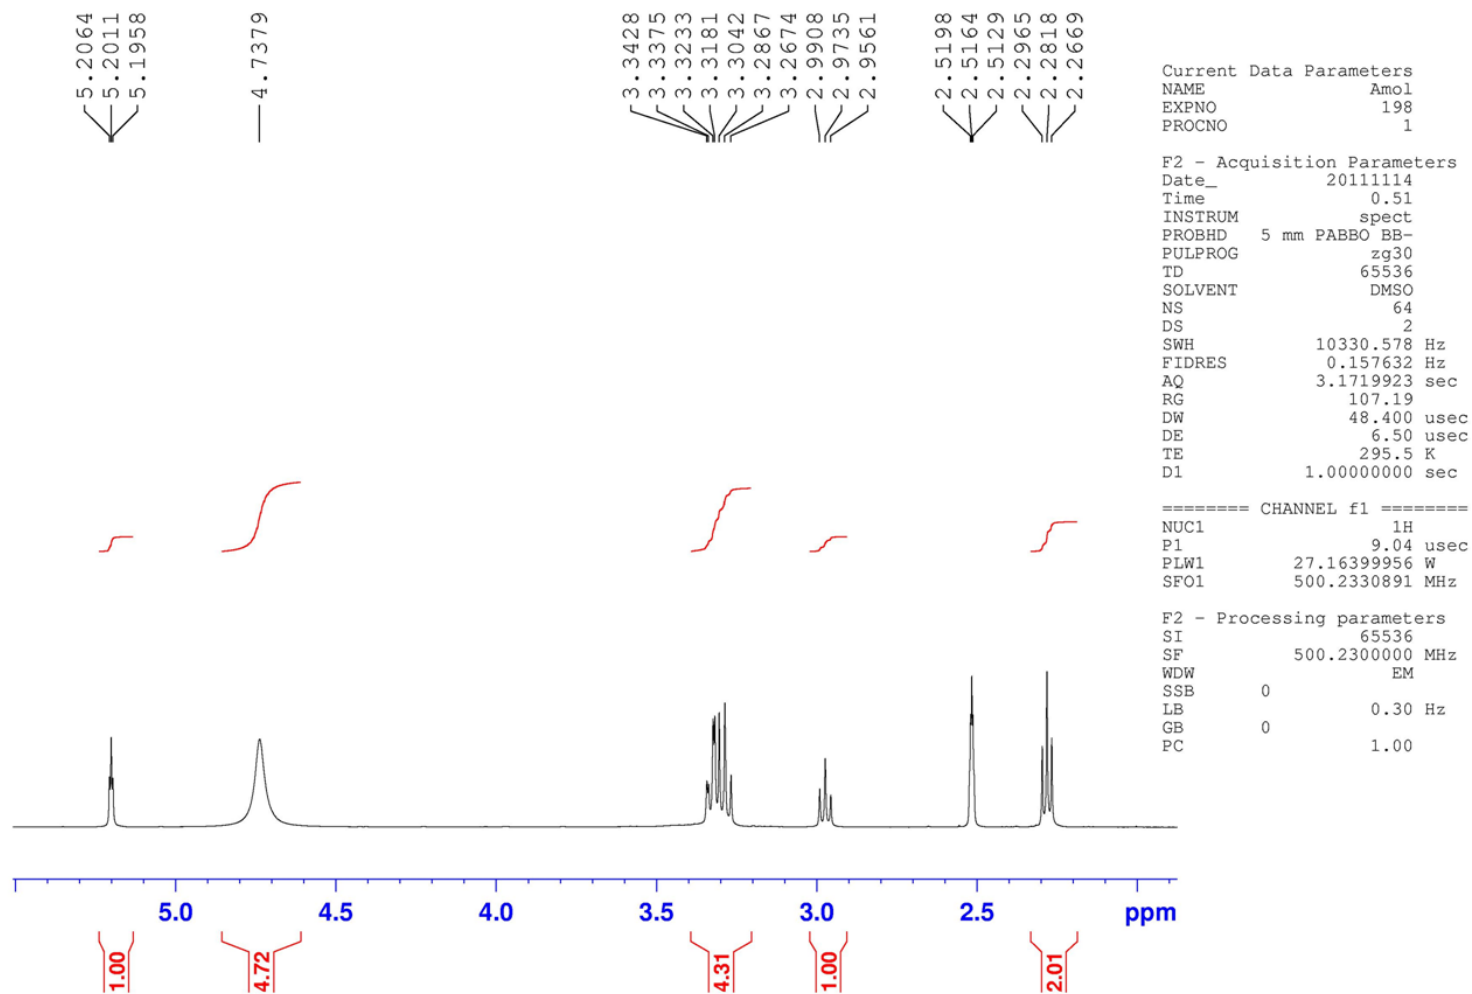

Current Data Parameters

| NAME   | Amol |
|--------|------|
| EXPNO  | 199  |
| PROCNO | 1    |

F2 - Acquisition Parameters

|         |                |
|---------|----------------|
| Date_   | 20111114       |
| Time    | 0.52           |
| INSTRUM | spect          |
| PROBHD  | 5 mm FABBO BB- |
| PULPROG | cosygpppqf     |
| TD      | 2048           |
| SOLVENT | DMSO           |
| NS      | 1              |
| DS      | 8              |
| SWH     | 3597.122 Hz    |
| FIDRES  | 1.756407 Hz    |
| AQ      | 0.2847220 sec  |
| RG      | 64.12          |
| DW      | 139.000 usec   |
| DE      | 6.50 usec      |
| TE      | 295.5 K        |
| D0      | 0.00000300 sec |
| D1      | 1.86851799 sec |
| D11     | 0.03000000 sec |
| D12     | 0.00002000 sec |
| D13     | 0.00000400 sec |
| D16     | 0.00020000 sec |
| IN0     | 0.00027800 sec |

===== CHANNEL f1 =====

|       |                 |
|-------|-----------------|
| NUC1  | 1H              |
| P0    | 9.04 usec       |
| P1    | 9.04 usec       |
| P17   | 2500.00 usec    |
| PLW1  | 27.16399956 W   |
| PLW10 | 3.28390002 W    |
| SFO1  | 500.2313902 MHz |

===== GRADIENT CHANNEL =====

|         |              |
|---------|--------------|
| GPNAME1 | SMSQ10.100   |
| GPZ1    | 10.00 %      |
| P16     | 1000.00 usec |

F1 - Acquisition parameters

|        |              |
|--------|--------------|
| TD     | 128          |
| SFO1   | 500.2314 MHz |
| FIDRES | 28.102518 Hz |
| SW     | 7.191 ppm    |
| FnMODE | QF           |

F2 - Processing parameters

|     |                 |
|-----|-----------------|
| SI  | 1024            |
| SF  | 500.2300000 MHz |
| WDW | QSINE           |
| SSB | 0               |
| LB  | 0 Hz            |
| GB  | 0               |
| PC  | 1.40            |

F1 - Processing parameters

|     |                 |
|-----|-----------------|
| SI  | 1024            |
| MC2 | QF              |
| SF  | 500.2300000 MHz |
| WDW | SIN             |
| SSB | 0               |
| LB  | 0 Hz            |
| GB  | 0               |

# Supplementary Information

## COSY of **3b** (zoom)

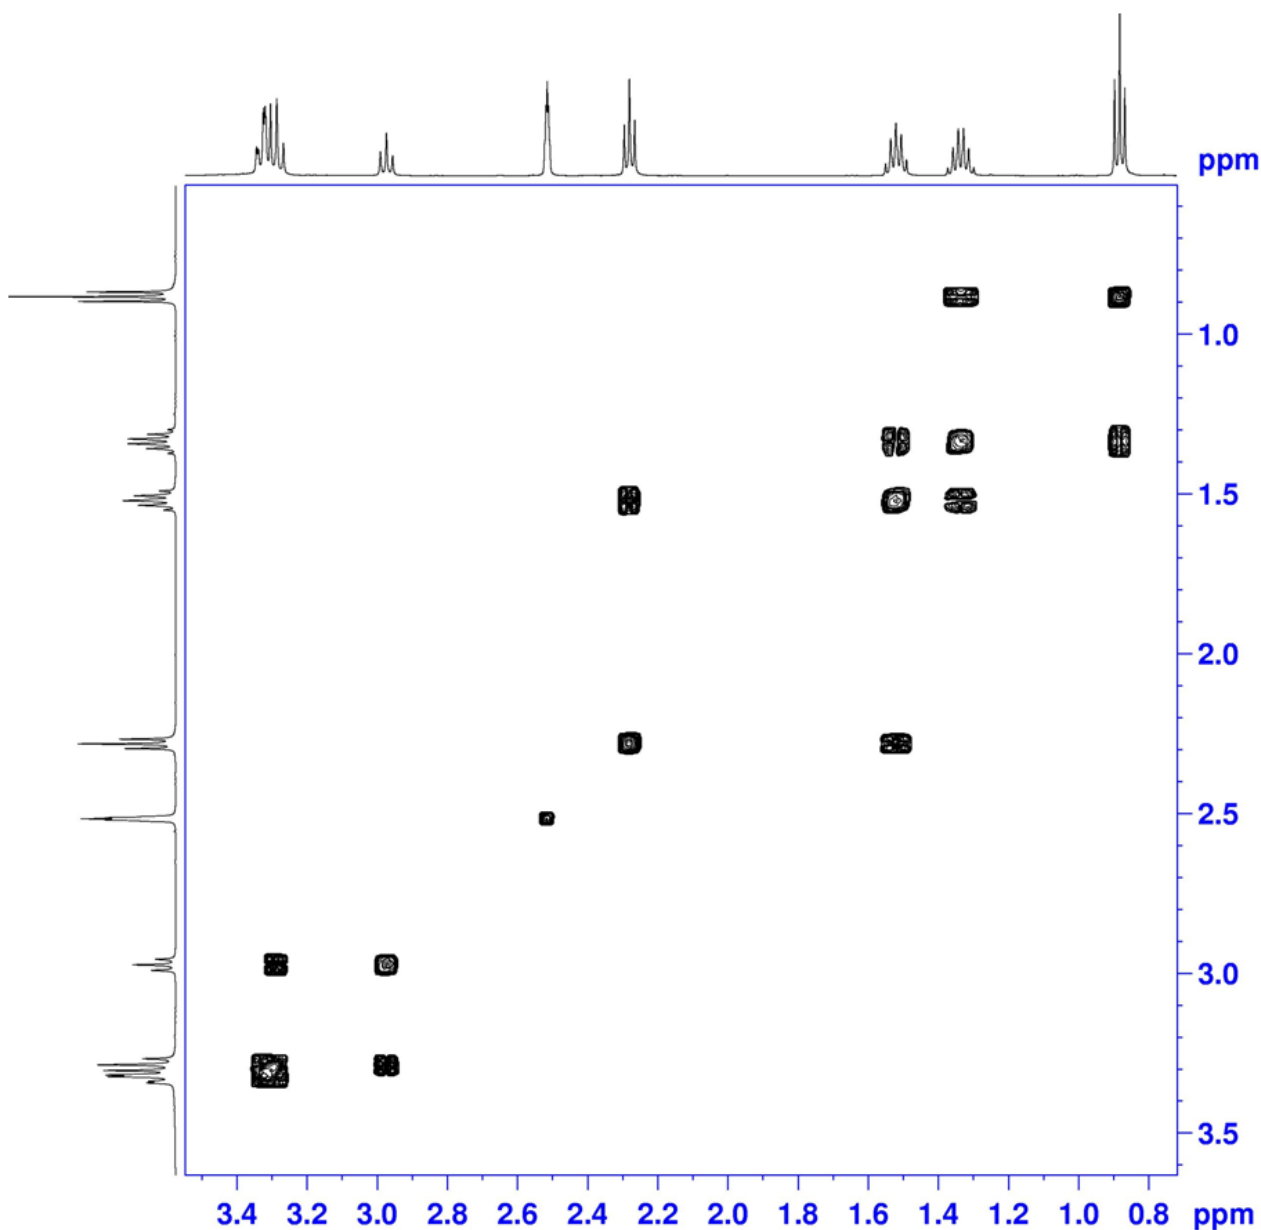

```

Current Data Parameters
NAME          Amol
EXPNO         199
PROCNO        1

F2 - Acquisition Parameters
Date_         20111114
Time          0.52
INSTRUM       spect
PROBHD        5 mm PABBO BB-
PULPROG       cosygpppgf
TD            2048
SOLVENT       DMSO
NS            1
DS            8
SWH           3597.122 Hz
FIDRES        1.756407 Hz
AQ            0.2847220 sec
RG            64.12
DW            139.000 usec
DE            6.50 usec
TE            295.5 K
D0            0.00000300 sec
D1            1.86851799 sec
D11           0.03000000 sec
D12           0.00002000 sec
D13           0.00000400 sec
D16           0.00020000 sec
IN0           0.00027800 sec

===== CHANNEL f1 =====
NUC1          1H
P0            9.04 usec
P1            9.04 usec
P17           2500.00 usec
PLW1          27.16399956 W
PLW10         3.28390002 W
SFO1          500.2313902 MHz

===== GRADIENT CHANNEL =====
GPNAM1        SMSQ10.100
GPZ1          10.00 %
P16           1000.00 usec

F1 - Acquisition parameters
TD            128
SFO1          500.2314 MHz
FIDRES        28.102518 Hz
SW            7.191 ppm
FnMODE        QF

F2 - Processing parameters
SI            1024
SF            500.2300000 MHz
WDW           QSINE
SSB           0
LB            0 Hz
GB            0
PC            1.40

F1 - Processing parameters
SI            1024
MC2           QF
SF            500.2300000 MHz
WDW           SIN
SSB           0
LB            0 Hz
GB            0
    
```

Supplementary Information

HMQC of 3b

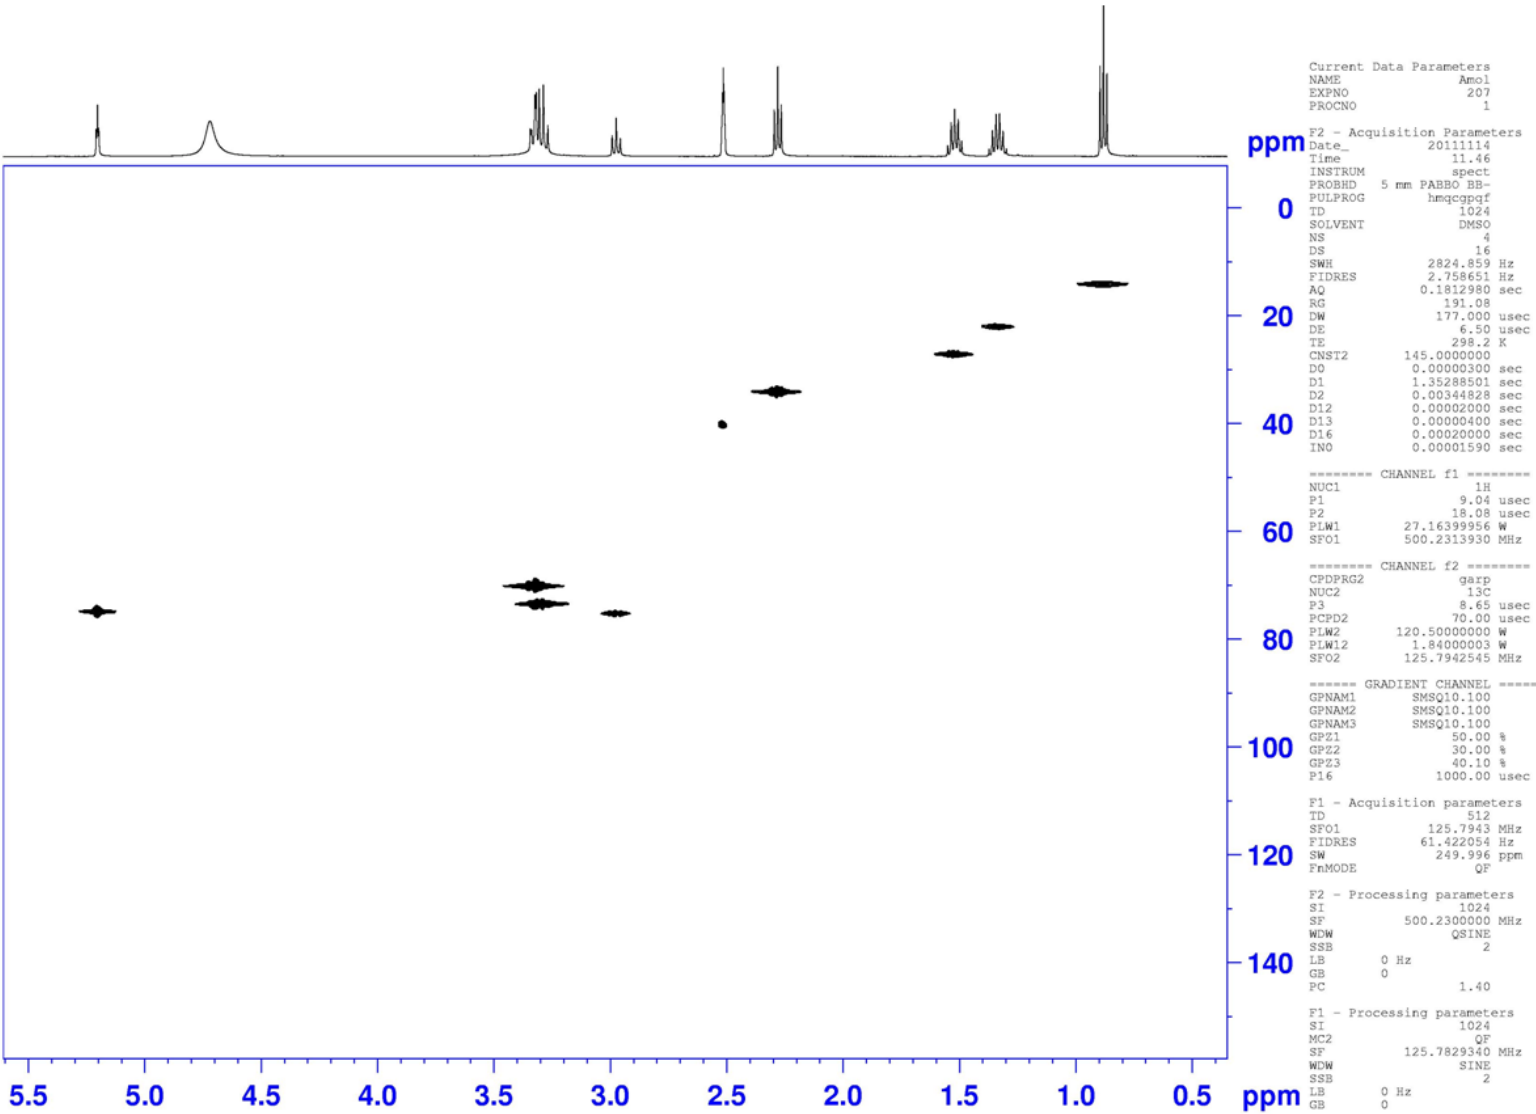

Supplementary Information

HMQC of **3b** (zoom)

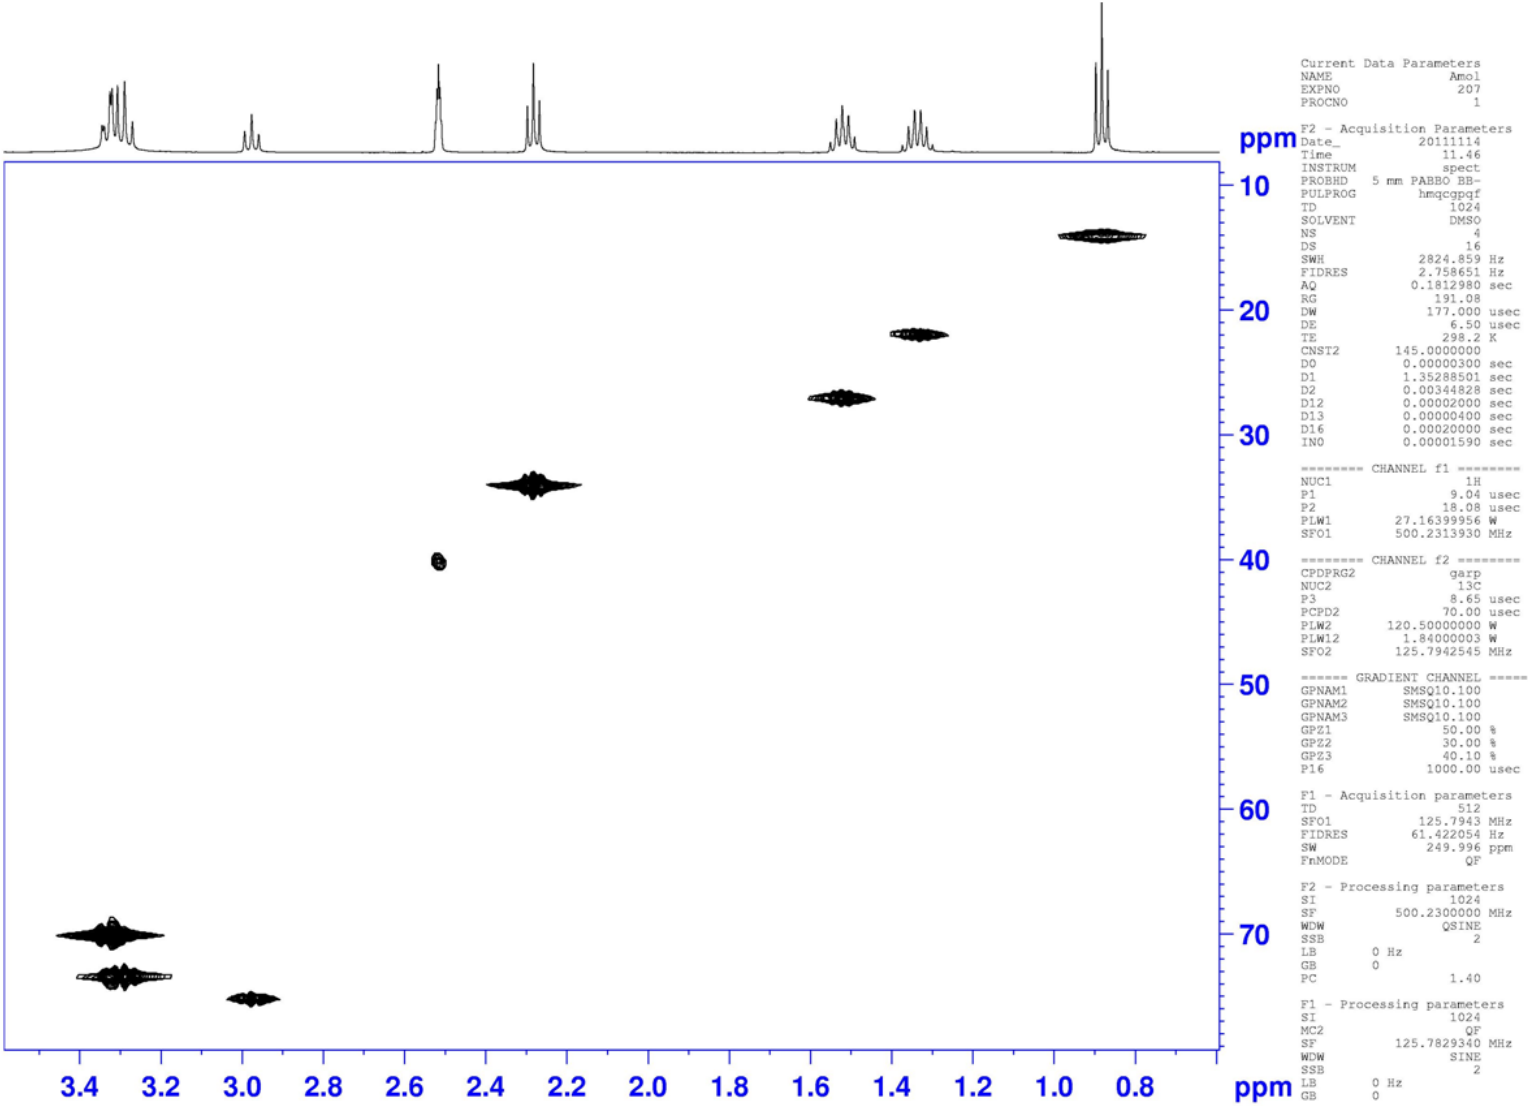

# Supplementary Information

## <sup>13</sup>C NMR of **3b** in DMSO-d<sub>6</sub>

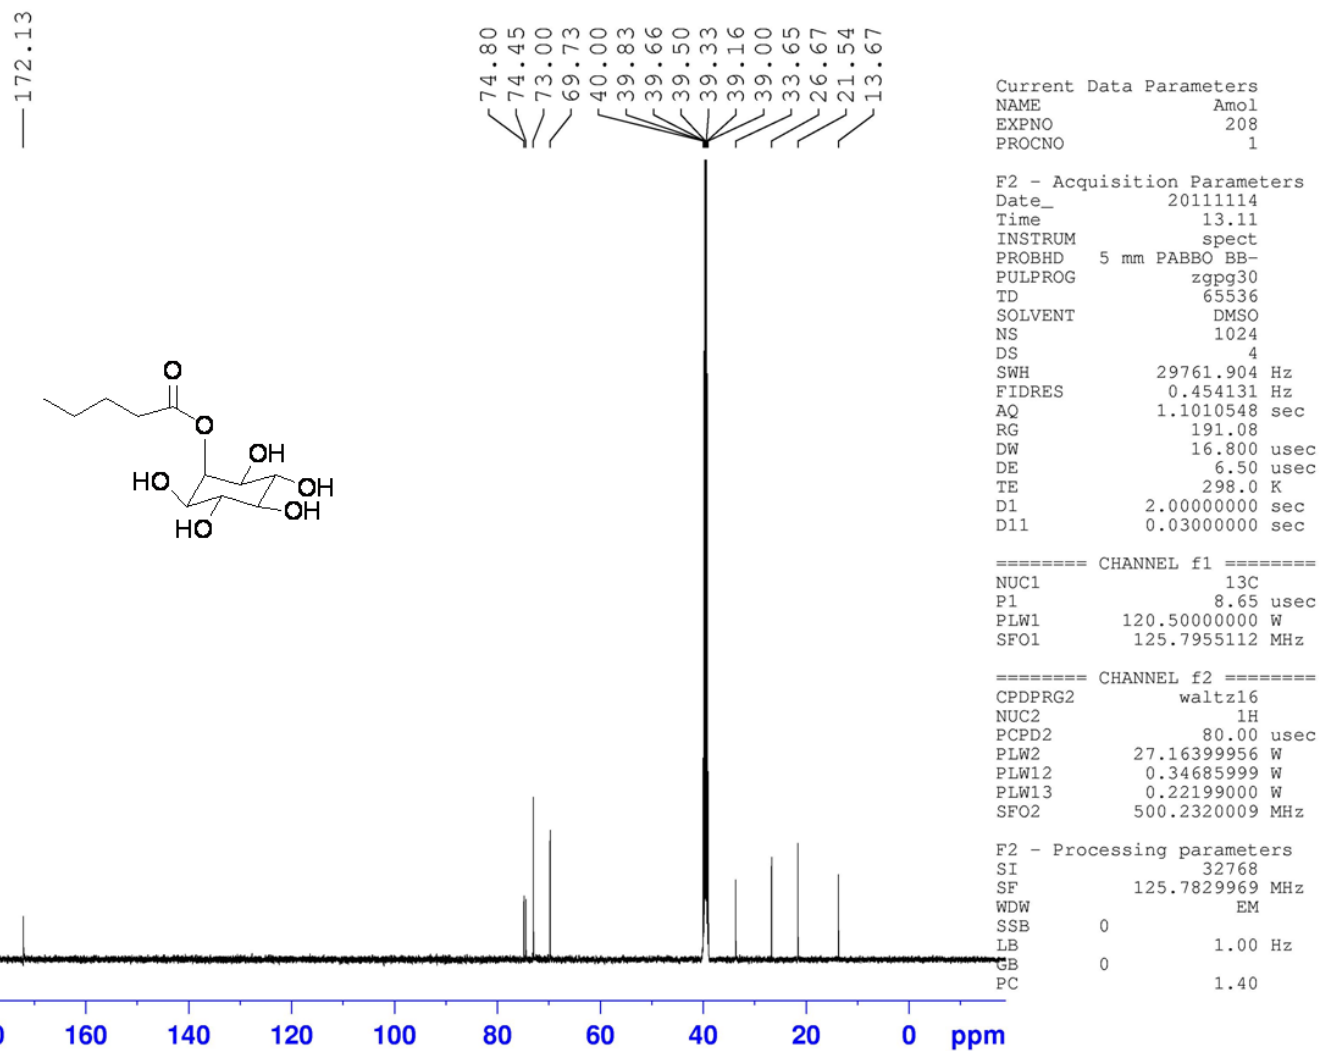



# Supplementary Information

## <sup>13</sup>C NMR of **3b** (zoom)

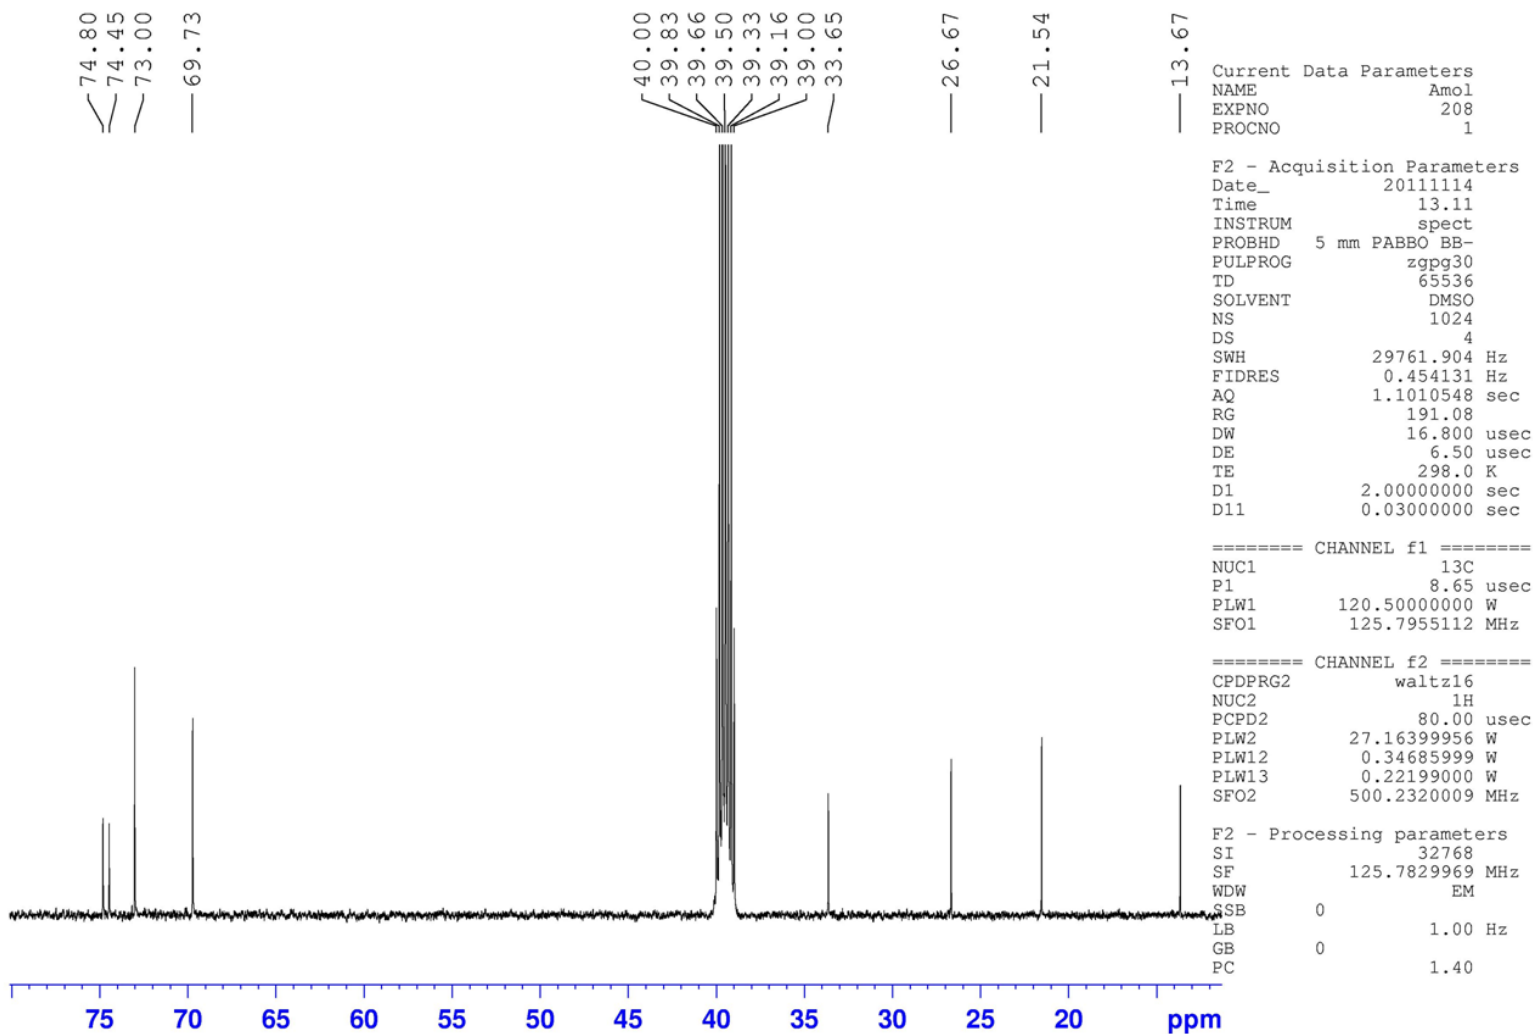

Supplementary Information

DEPT of **3b**

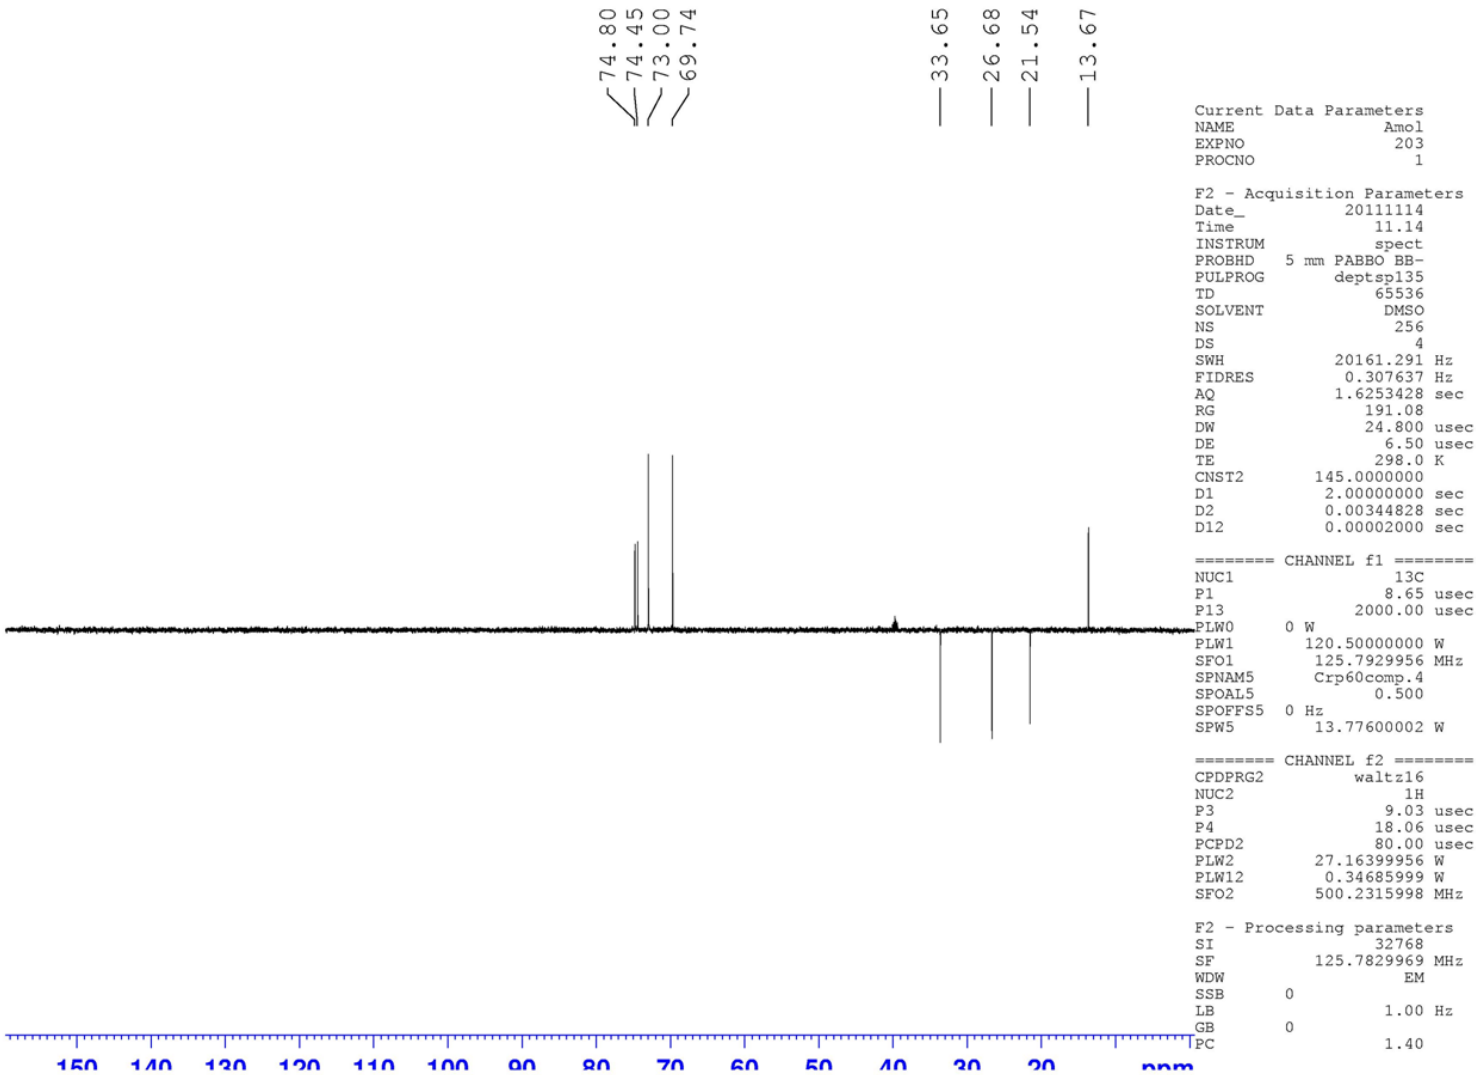

# Supplementary Information

<sup>1</sup>H NMR of **3c** in DMSO-d<sub>6</sub>

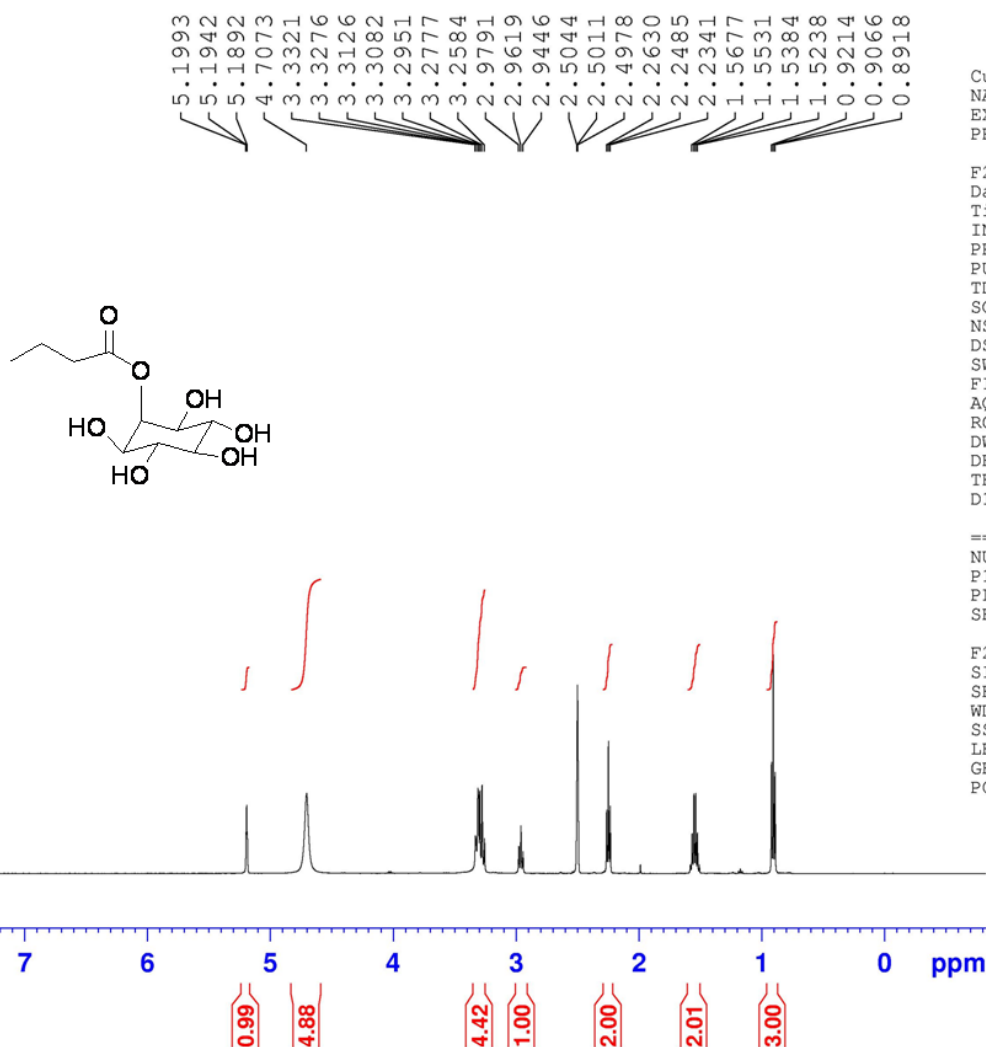

Current Data Parameters  
NAME Sagar  
EXPNO 201  
PROCNO 1

F2 - Acquisition Parameters  
Date\_ 20111114  
Time 17.30  
INSTRUM spect  
PROBHD 5 mm PABBO BB-  
PULPROG zg30  
TD 65536  
SOLVENT DMSO  
NS 16  
DS 2  
SWH 10330.578 Hz  
FIDRES 0.157632 Hz  
AQ 3.1719923 sec  
RG 138.93  
DW 48.400 usec  
DE 6.50 usec  
TE 298.0 K  
D1 1.00000000 sec

===== CHANNEL f1 =====  
NUC1 1H  
P1 9.04 usec  
PLW1 27.16399956 W  
SFO1 500.2330891 MHz

F2 - Processing parameters  
SI 65536  
SF 500.2300076 MHz  
WDW EM  
SSB 0  
LB 0.30 Hz  
GB 0  
PC 1.00

# Supplementary Information

## <sup>1</sup>H NMR of **3c** (zoom)

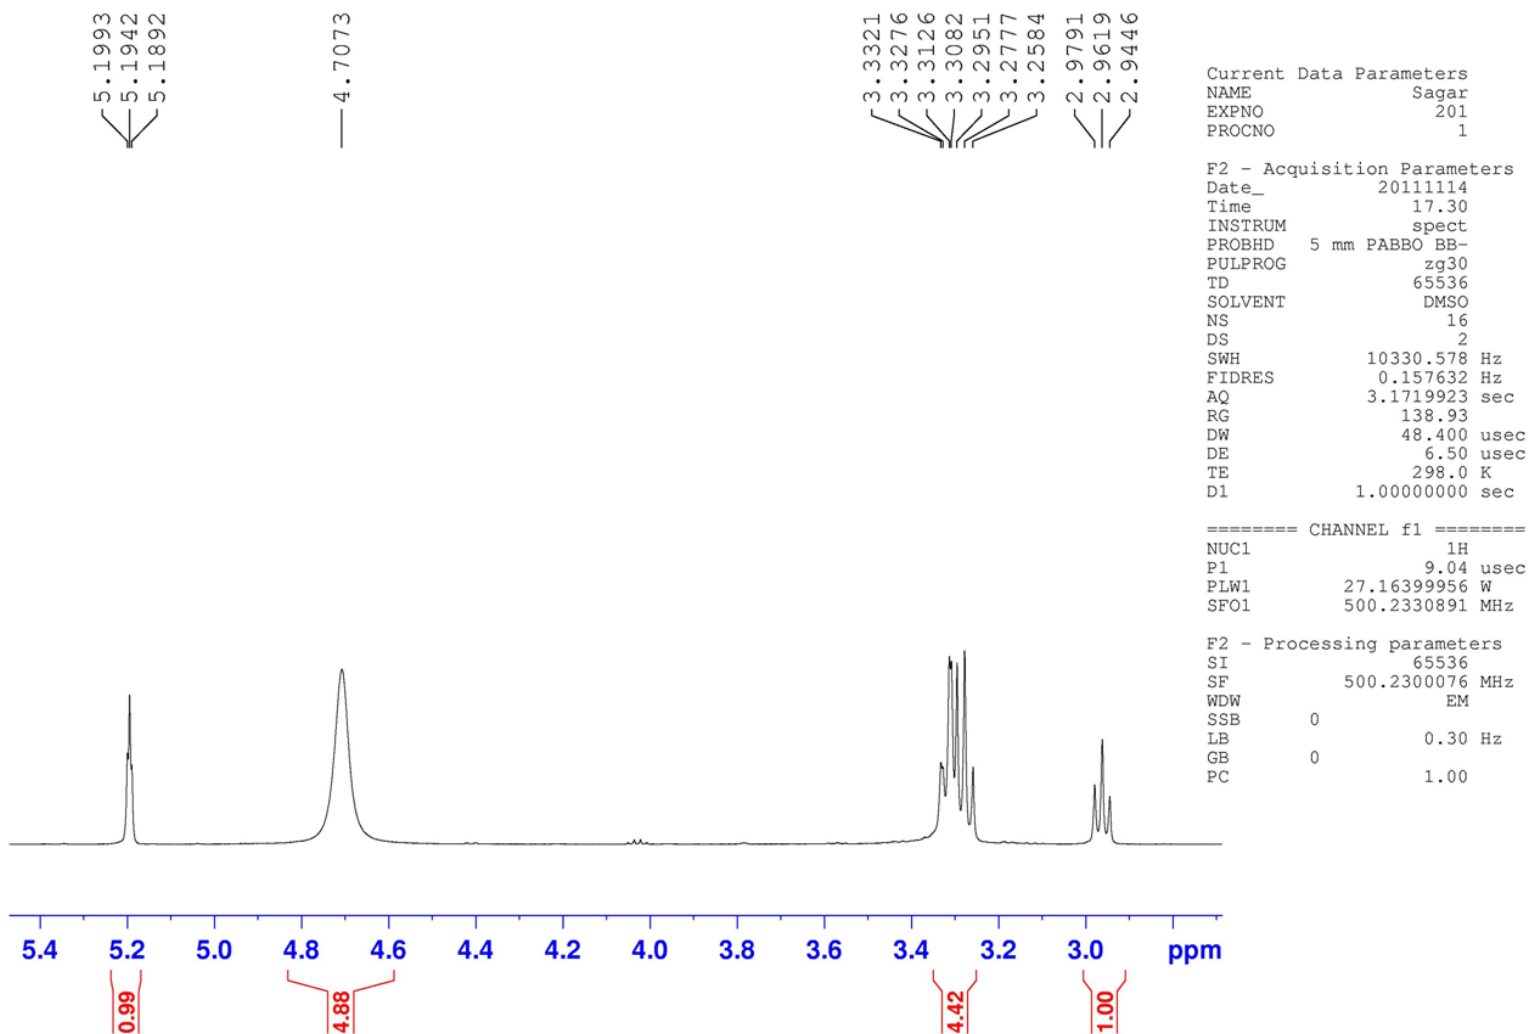

# Supplementary Information

## COSY of 3c

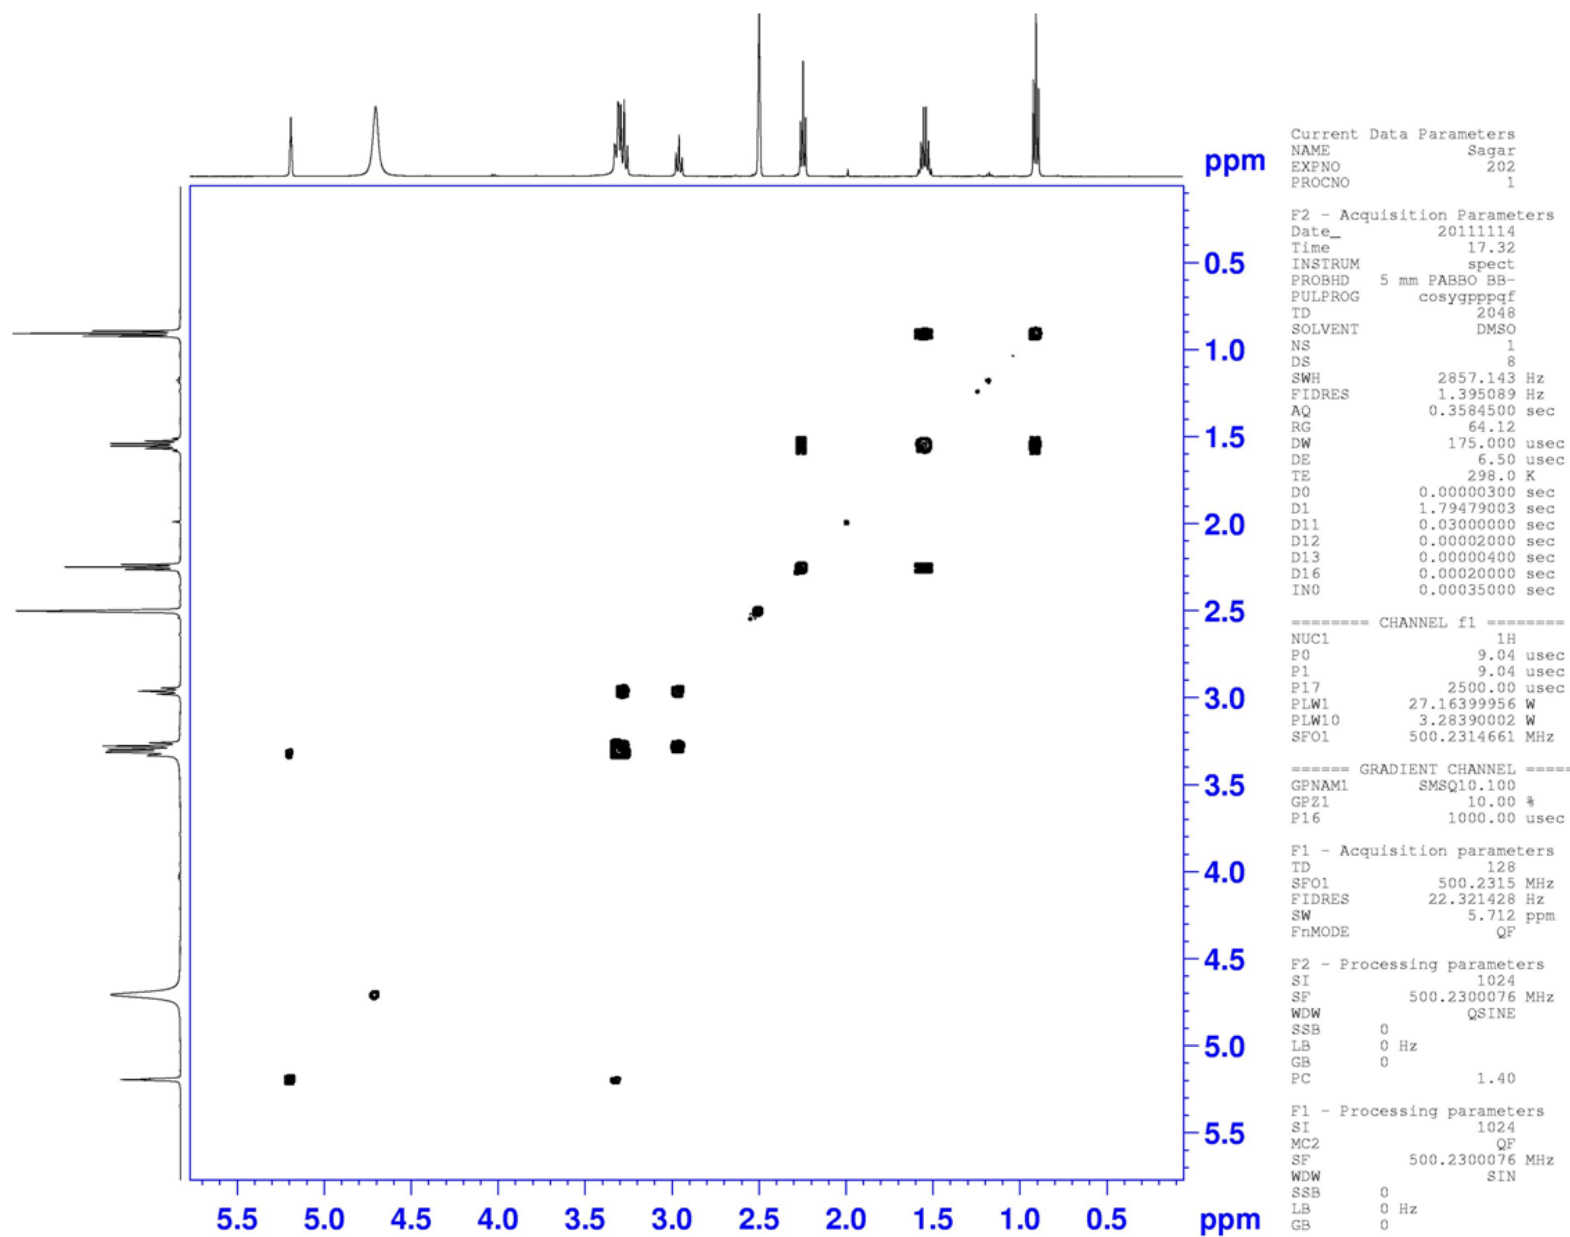

# Supplementary Information

## COSY of **3c** (zoom)

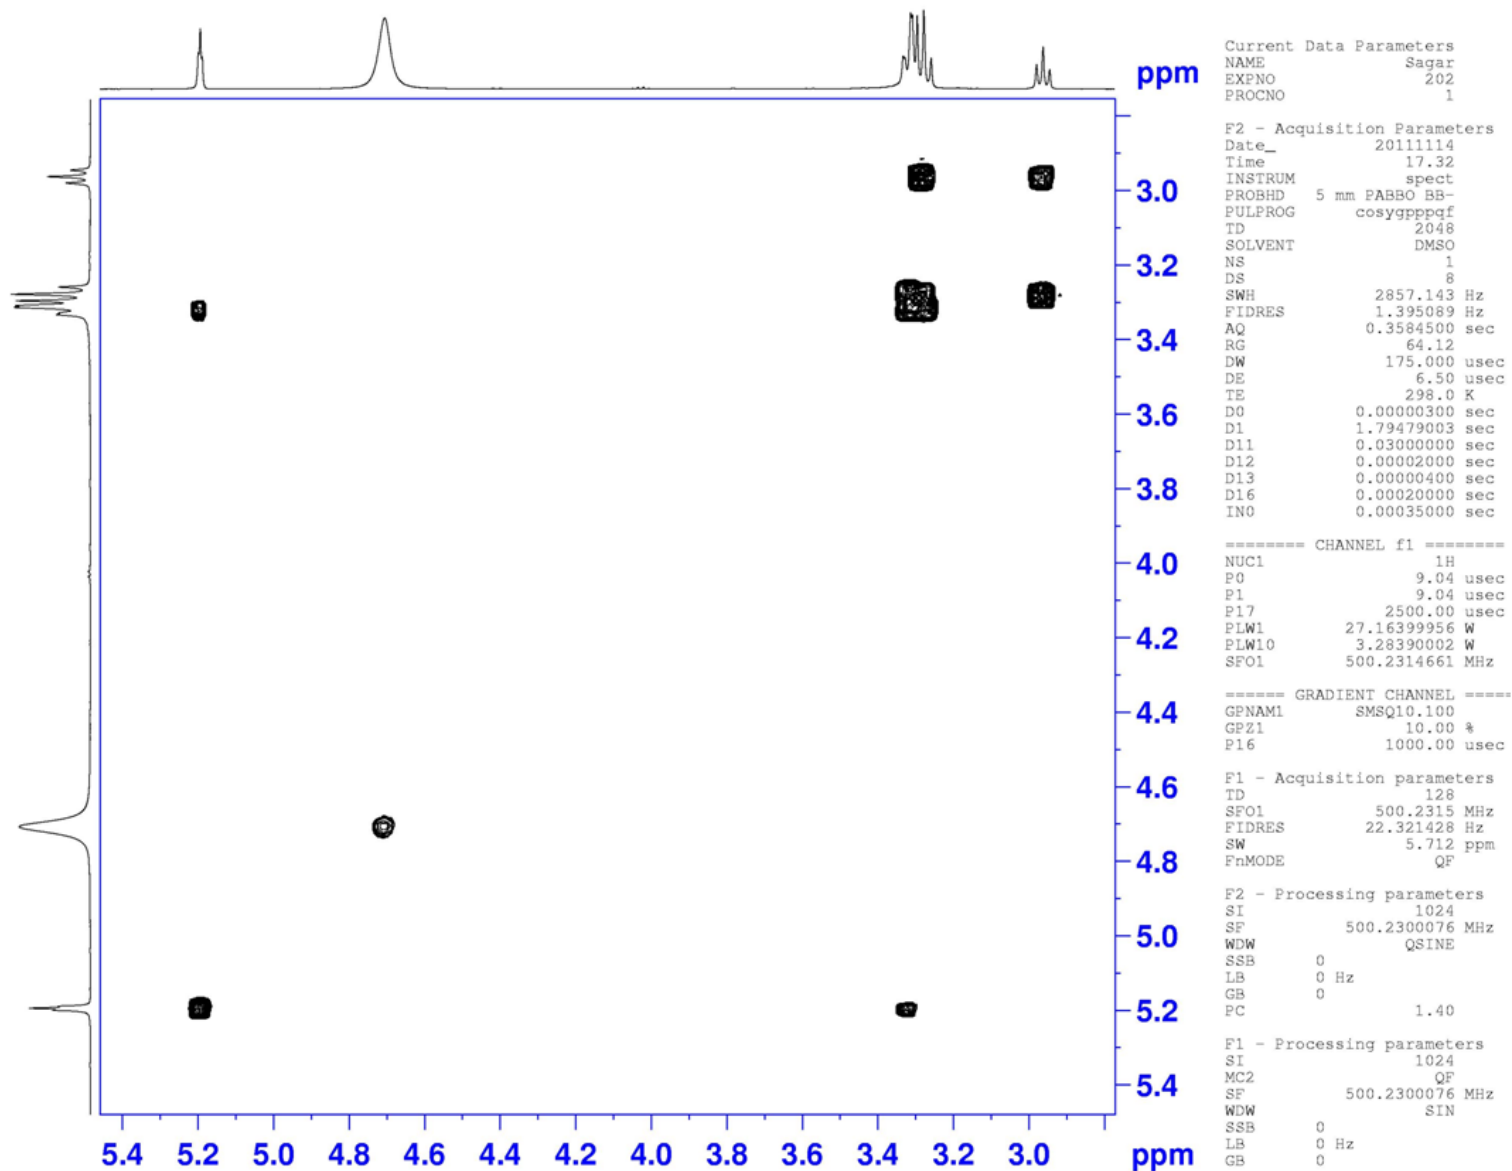

Supplementary Information

HMQC of 3c

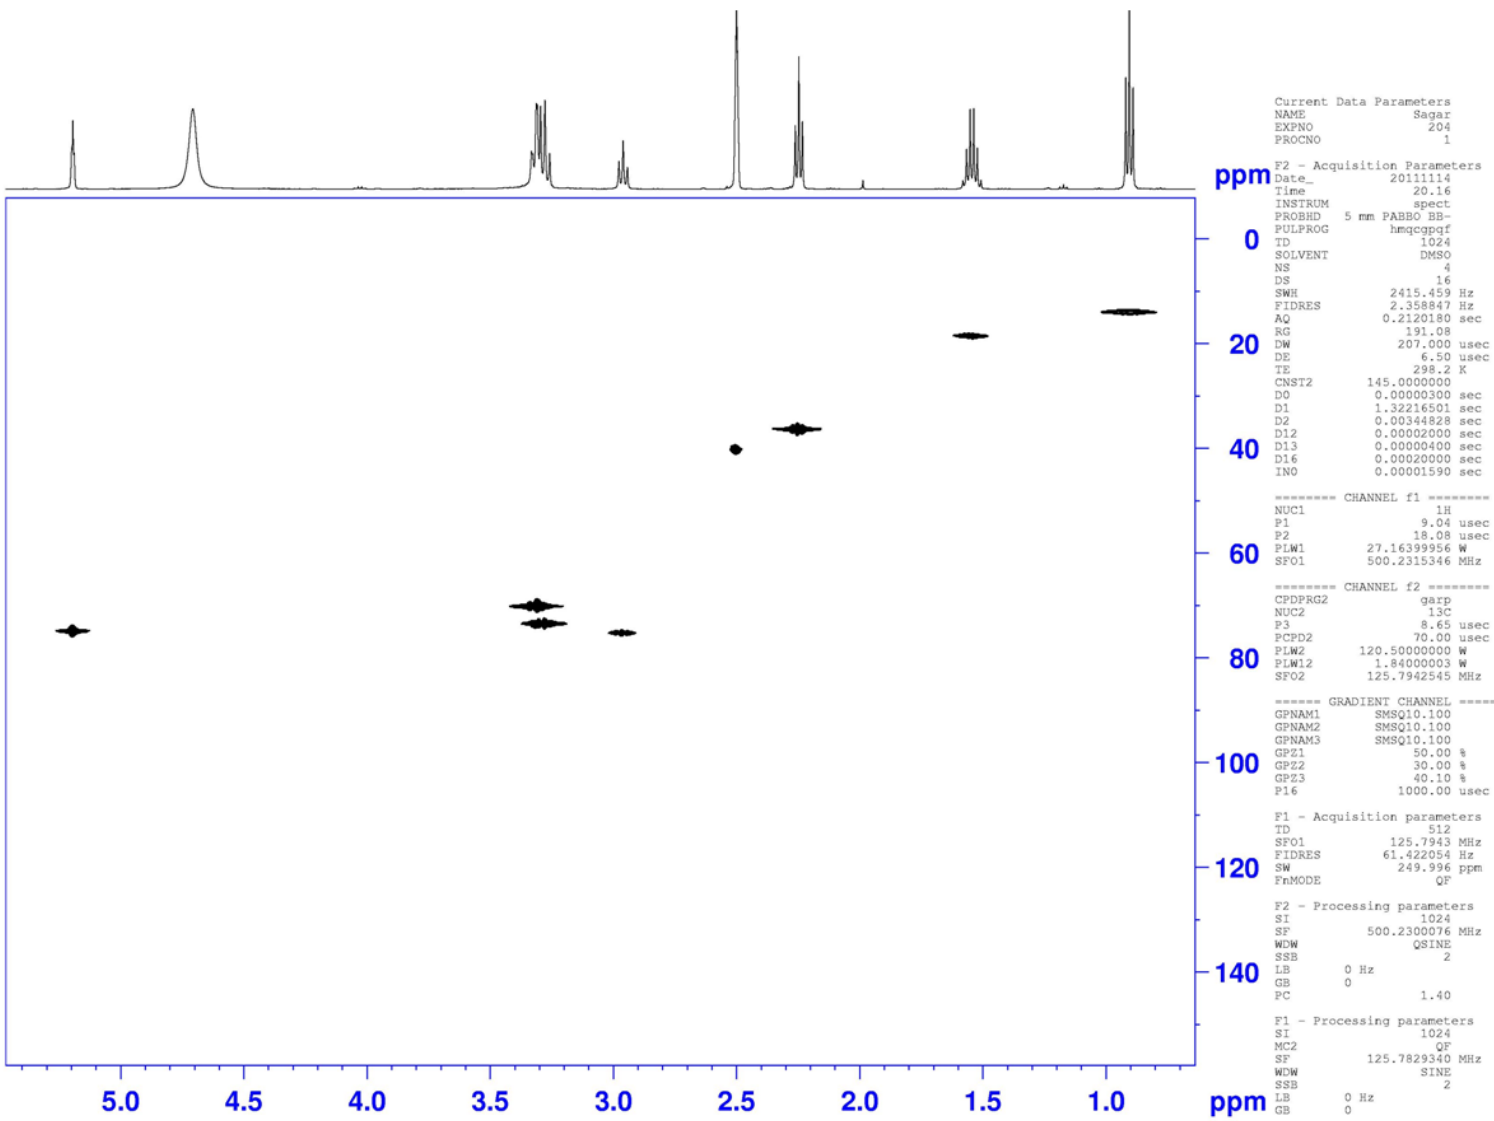

# Supplementary Information

## <sup>13</sup>C NMR of **3c** in DMSO-d<sub>6</sub>

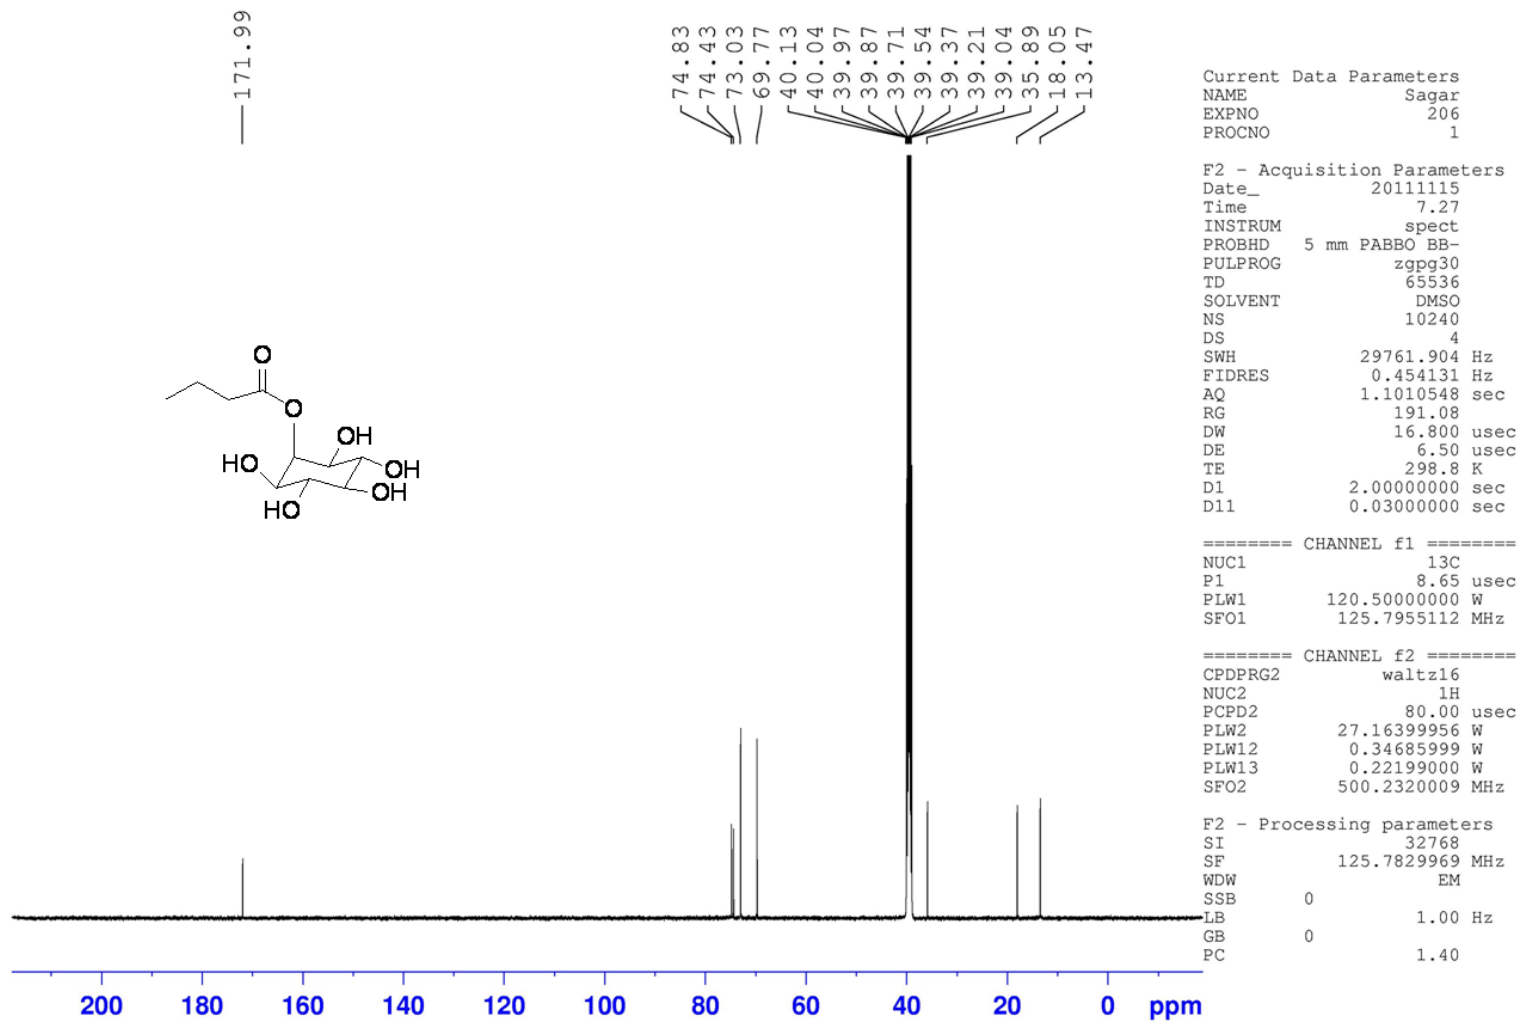



# Supplementary Information

## <sup>13</sup>C NMR of **3c** (zoom)

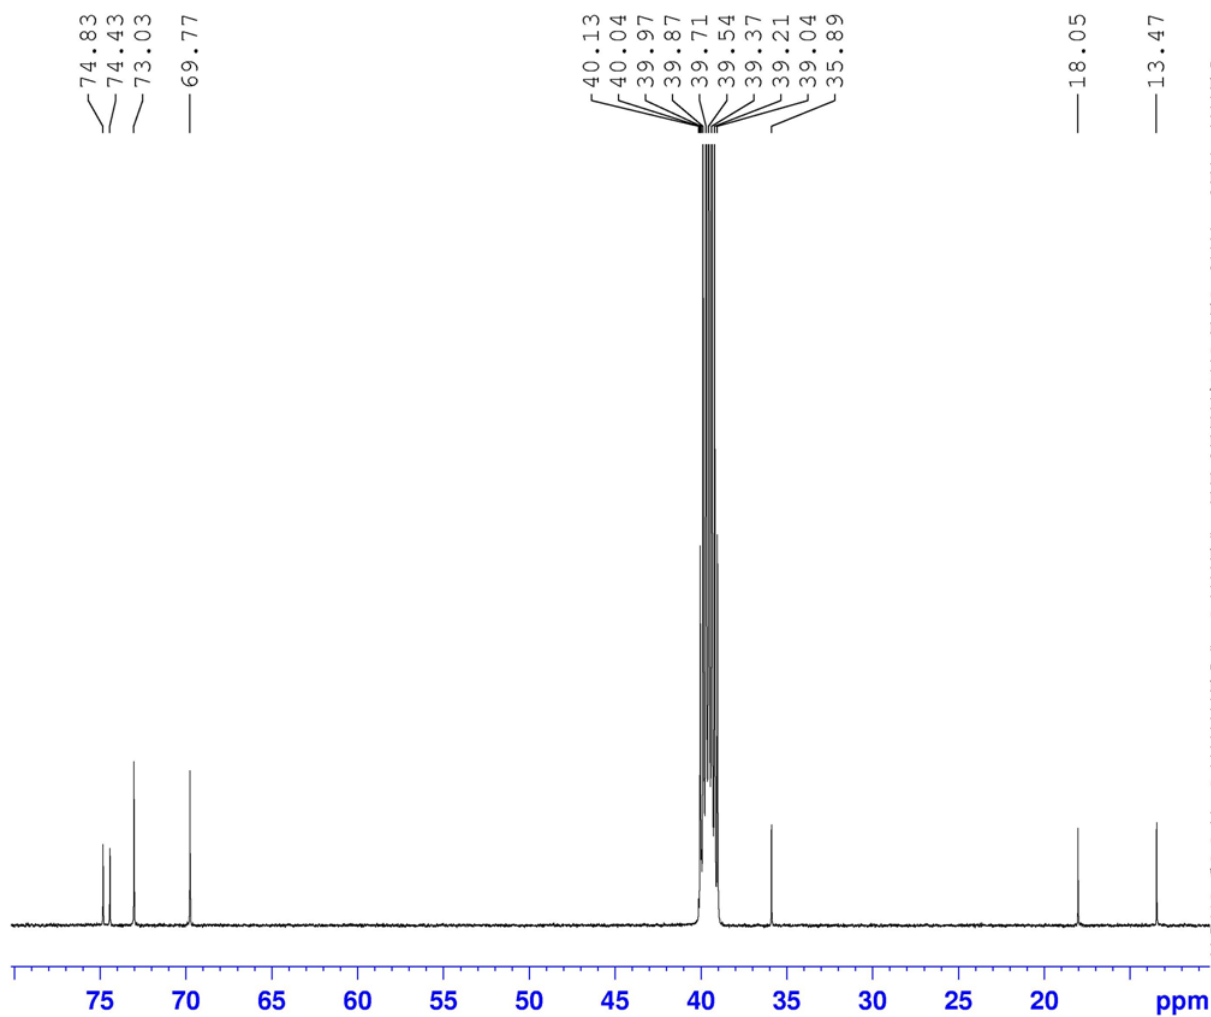

Current Data Parameters  
NAME Sagar  
EXPNO 206  
PROCNO 1

F2 - Acquisition Parameters  
Date\_ 20111115  
Time 7.27  
INSTRUM spect  
PROBHD 5 mm PABBO BB-  
PULPROG zgpg30  
TD 65536  
SOLVENT DMSO  
NS 10240  
DS 4  
SWH 29761.904 Hz  
FIDRES 0.454131 Hz  
AQ 1.1010548 sec  
RG 191.08  
DW 16.800 usec  
DE 6.50 usec  
TE 298.8 K  
D1 2.00000000 sec  
D11 0.03000000 sec

===== CHANNEL f1 =====  
NUC1 13C  
P1 8.65 usec  
PLW1 120.50000000 W  
SFO1 125.7955112 MHz

===== CHANNEL f2 =====  
CPDPRG2 waltz16  
NUC2 1H  
PCPD2 80.00 usec  
PLW2 27.16399956 W  
PLW12 0.34685999 W  
PLW13 0.22199000 W  
SFO2 500.2320009 MHz

F2 - Processing parameters  
SI 32768  
SF 125.7829969 MHz  
WDW EM  
SSB 0  
LB 1.00 Hz  
GB 0  
PC 1.40

Supplementary Information

DEPT of 3c

C13DEPT135 DMSO E:\ IISER

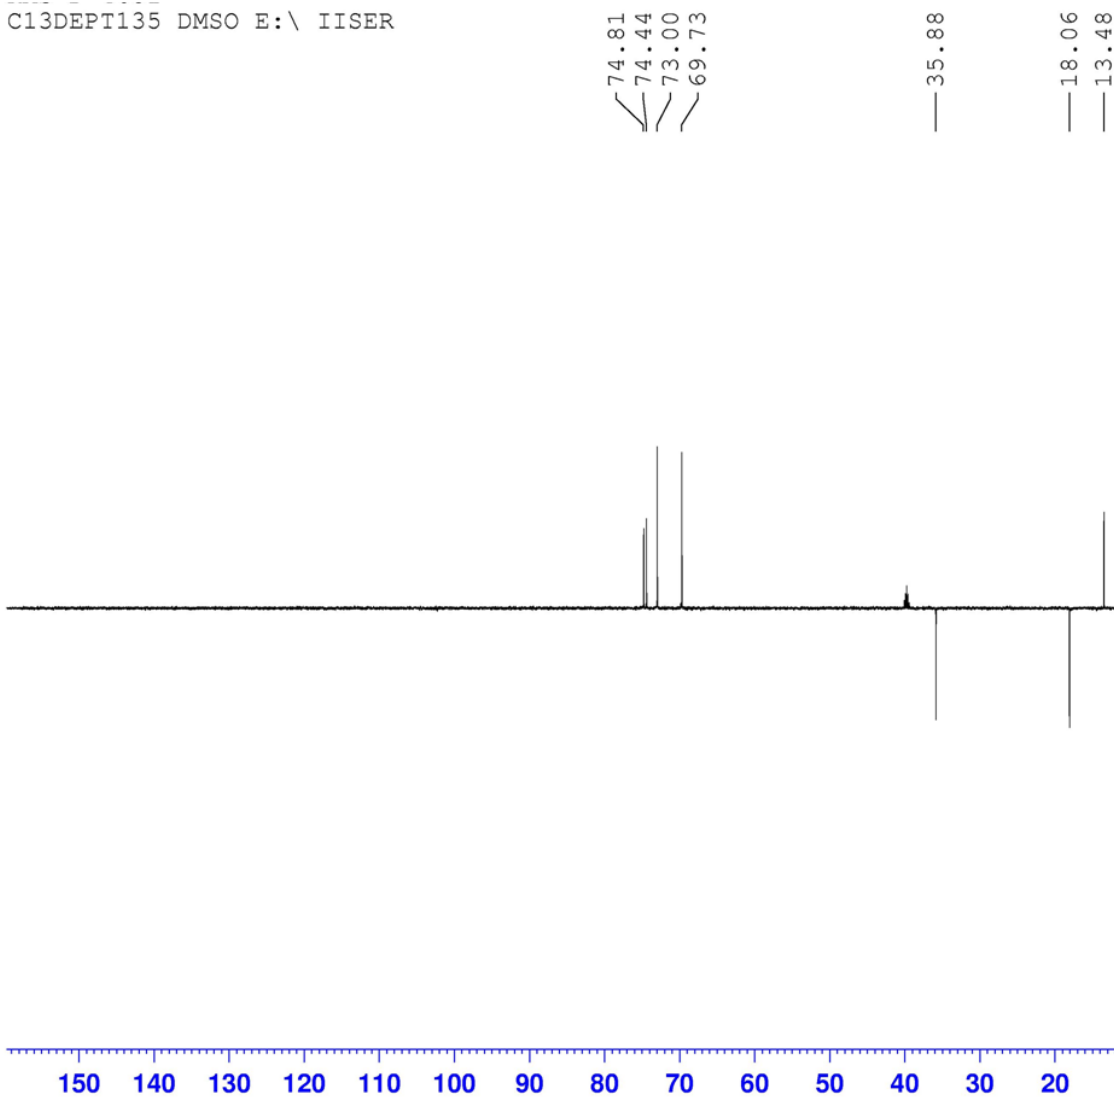

Current Data Parameters  
NAME Sagar  
EXPNO 203  
PROCNO 1

F2 - Acquisition Parameters  
Date\_ 20111114  
Time 20.15  
INSTRUM spect  
PROBHD 5 mm PABBO BB-  
PULPROG deptsp135  
TD 65536  
SOLVENT DMSO  
NS 2560  
DS 4  
SWH 20161.291 Hz  
FIDRES 0.307637 Hz  
AQ 1.6253428 sec  
RG 191.08  
DW 24.800 usec  
DE 6.50 usec  
TE 298.0 K  
CNST2 145.0000000  
D1 2.00000000 sec  
D2 0.00344828 sec  
D12 0.00002000 sec

===== CHANNEL f1 =====  
NUC1 13C  
P1 8.65 usec  
P13 2000.00 usec  
PLW0 0 W  
PLW1 120.50000000 W  
SFO1 125.7929956 MHz  
SPNAM5 Crp60comp.4  
SPOAL5 0.500  
SPOFFS5 0 Hz  
SPW5 13.77600002 W

===== CHANNEL f2 =====  
CPDPRG2 waltz16  
NUC2 1H  
P3 9.03 usec  
P4 18.06 usec  
PCPD2 80.00 usec  
PLW2 27.16399956 W  
PLW12 0.34685999 W  
SFO2 500.2315998 MHz

F2 - Processing parameters  
SI 32768  
SF 125.7829969 MHz  
WDW EM  
SSB 0  
LB 1.00 Hz  
GB 0  
PC 1.40

# Supplementary Information

## <sup>1</sup>H NMR of **3d** in DMSO-d<sub>6</sub>

5.2032  
5.1979  
5.1927  
3.5408  
3.3394  
3.3338  
3.3200  
3.3147  
3.3073  
3.2903  
3.2708  
2.9938  
2.9768  
2.5236  
2.5201  
2.5165  
2.5129  
2.5094  
2.3222  
2.3072  
2.2921  
2.2771  
1.0477  
1.0327  
1.0176

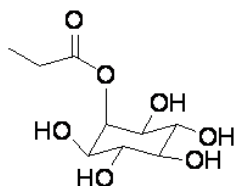

Current Data Parameters  
NAME Sagar  
EXPNO 220  
PROCNO 1

F2 - Acquisition Parameters  
Date\_ 20111116  
Time 14.35  
INSTRUM spect  
PROBHD 5 mm PABBO BB-  
PULPROG zg30  
TD 65536  
SOLVENT DMSO  
NS 64  
DS 2  
SWH 10330.578 Hz  
FIDRES 0.157632 Hz  
AQ 3.1719923 sec  
RG 125.62  
DW 48.400 usec  
DE 6.50 usec  
TE 298.0 K  
D1 1.00000000 sec

===== CHANNEL f1 =====  
NUC1 1H  
P1 9.04 usec  
PLW1 27.16399956 W  
SFO1 500.2330891 MHz

F2 - Processing parameters  
SI 65536  
SF 500.2300000 MHz  
WDW EM  
SSB 0  
LB 0.30 Hz  
GB 0  
PC 1.00

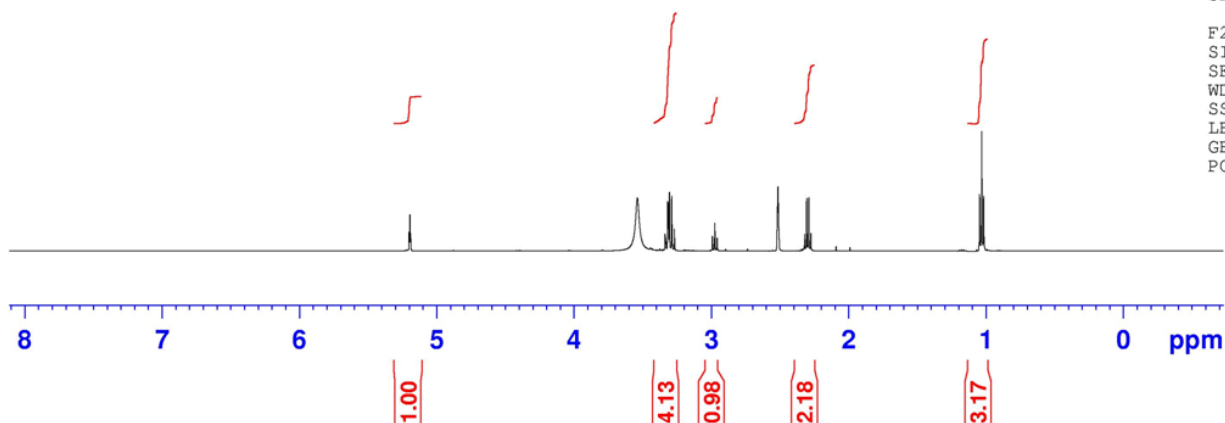

# Supplementary Information

## <sup>1</sup>H NMR of **3d** (zoom)

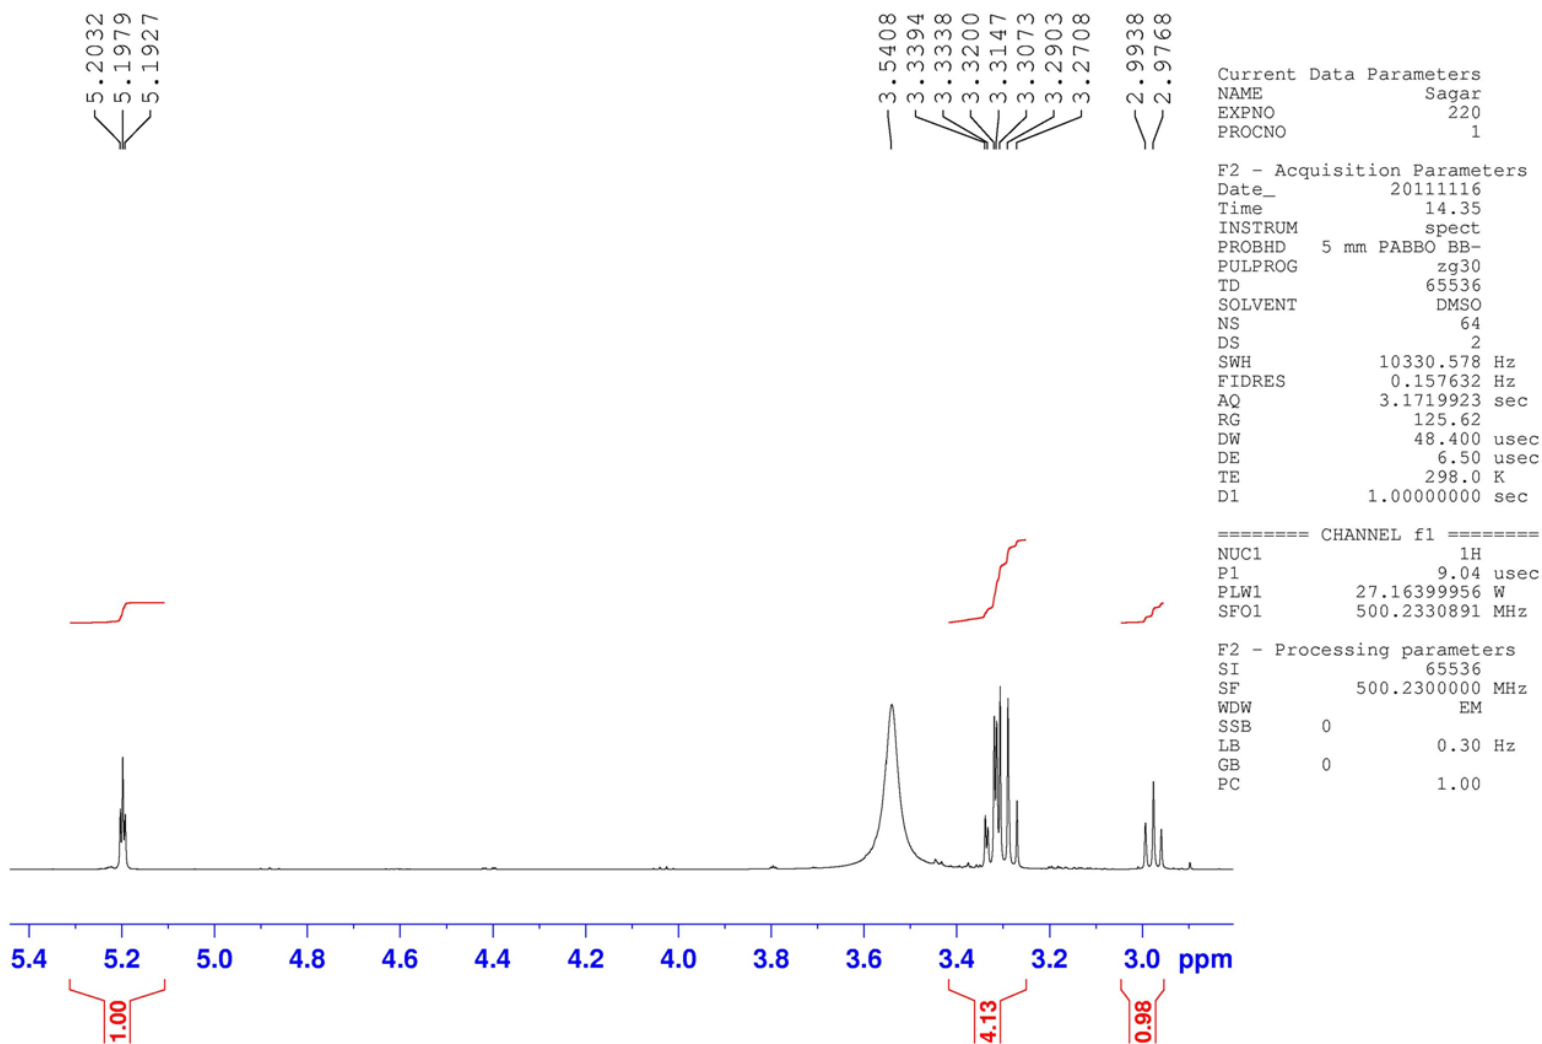

# Supplementary Information

## COSY of **3d**

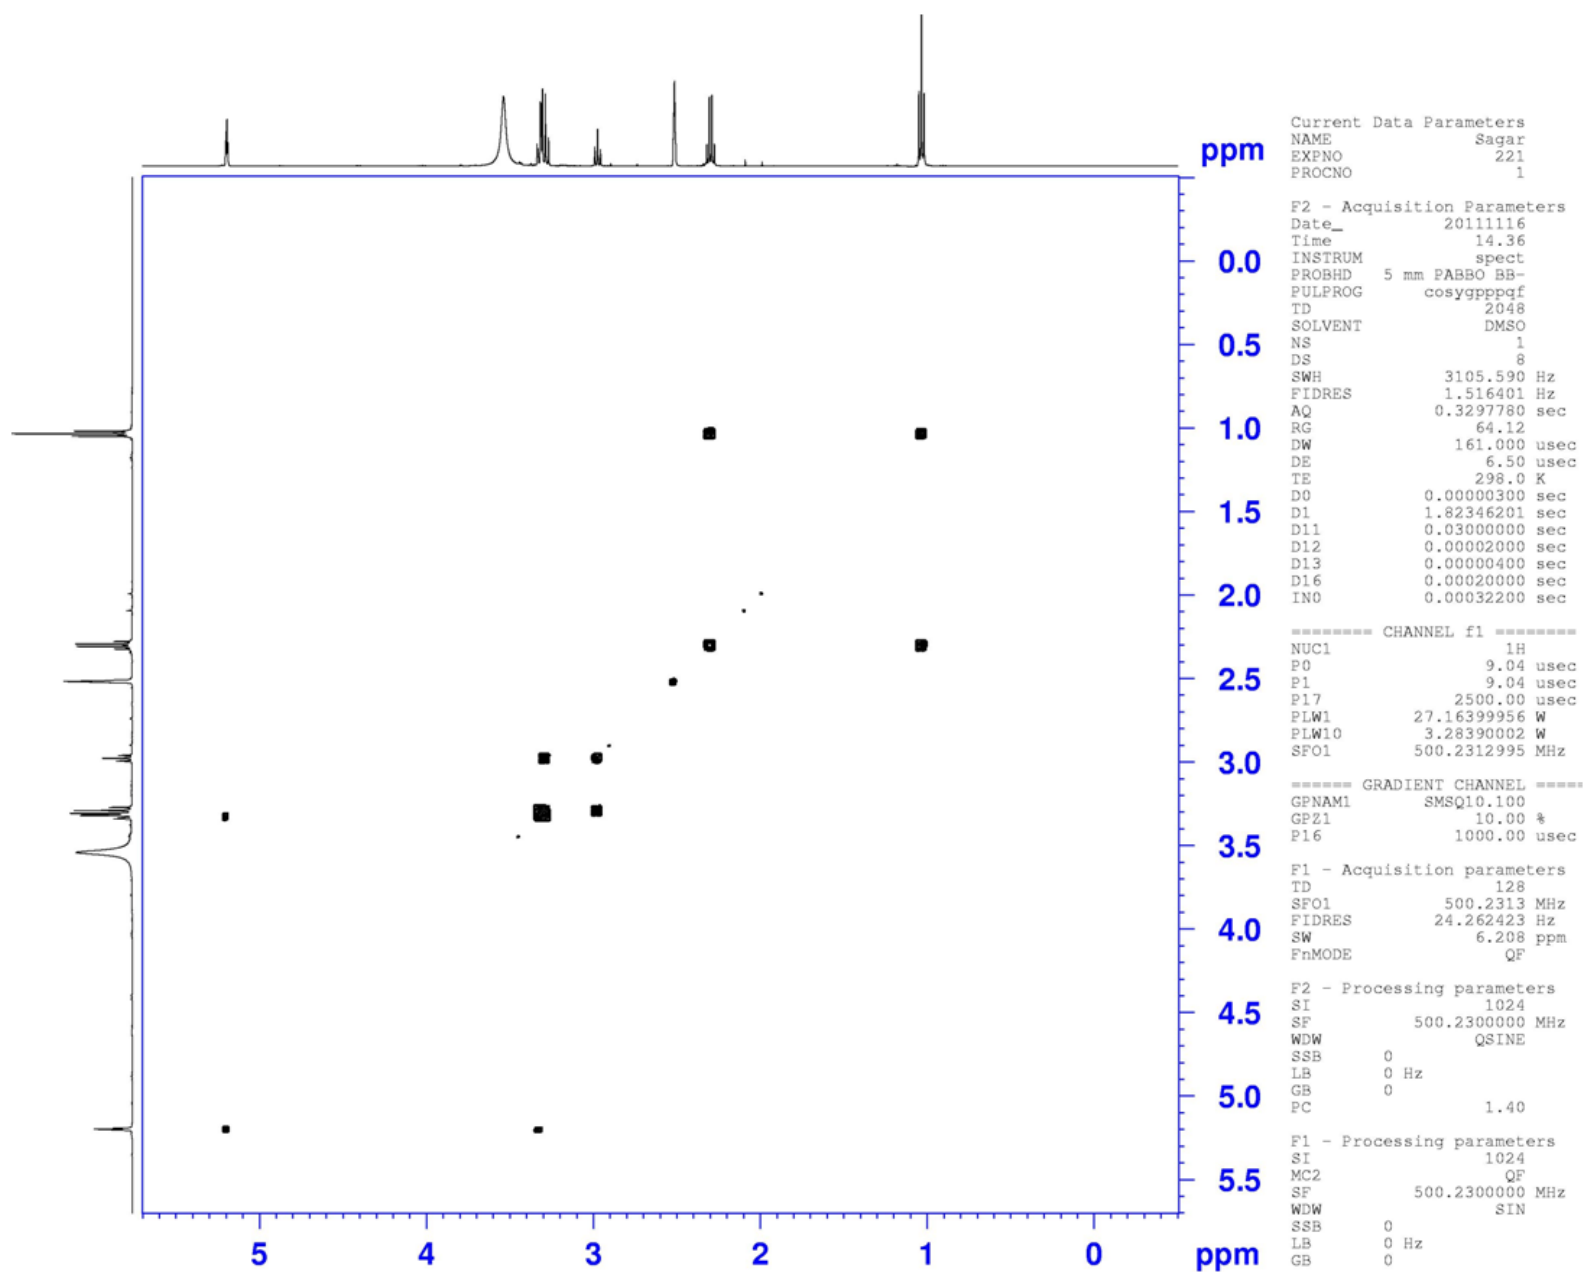

# Supplementary Information

## COSY of **3d** (zoom)

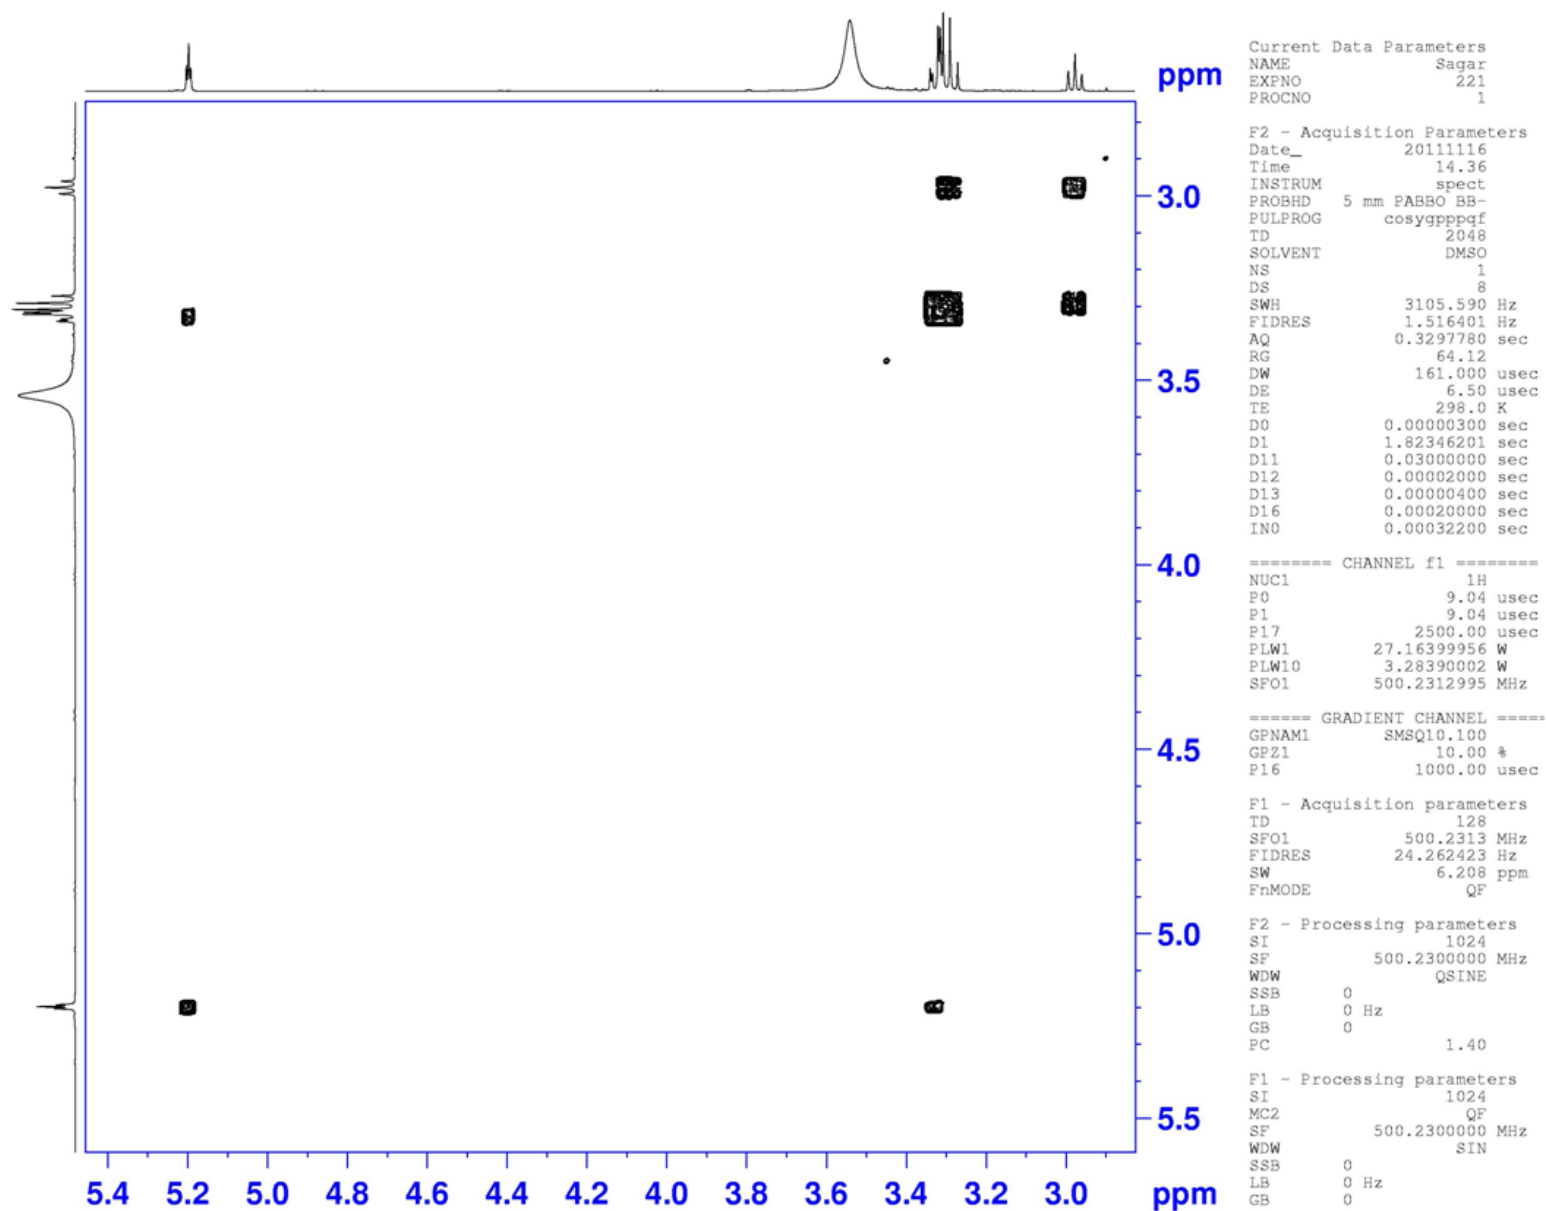

Supplementary Information

HMQC of 3d

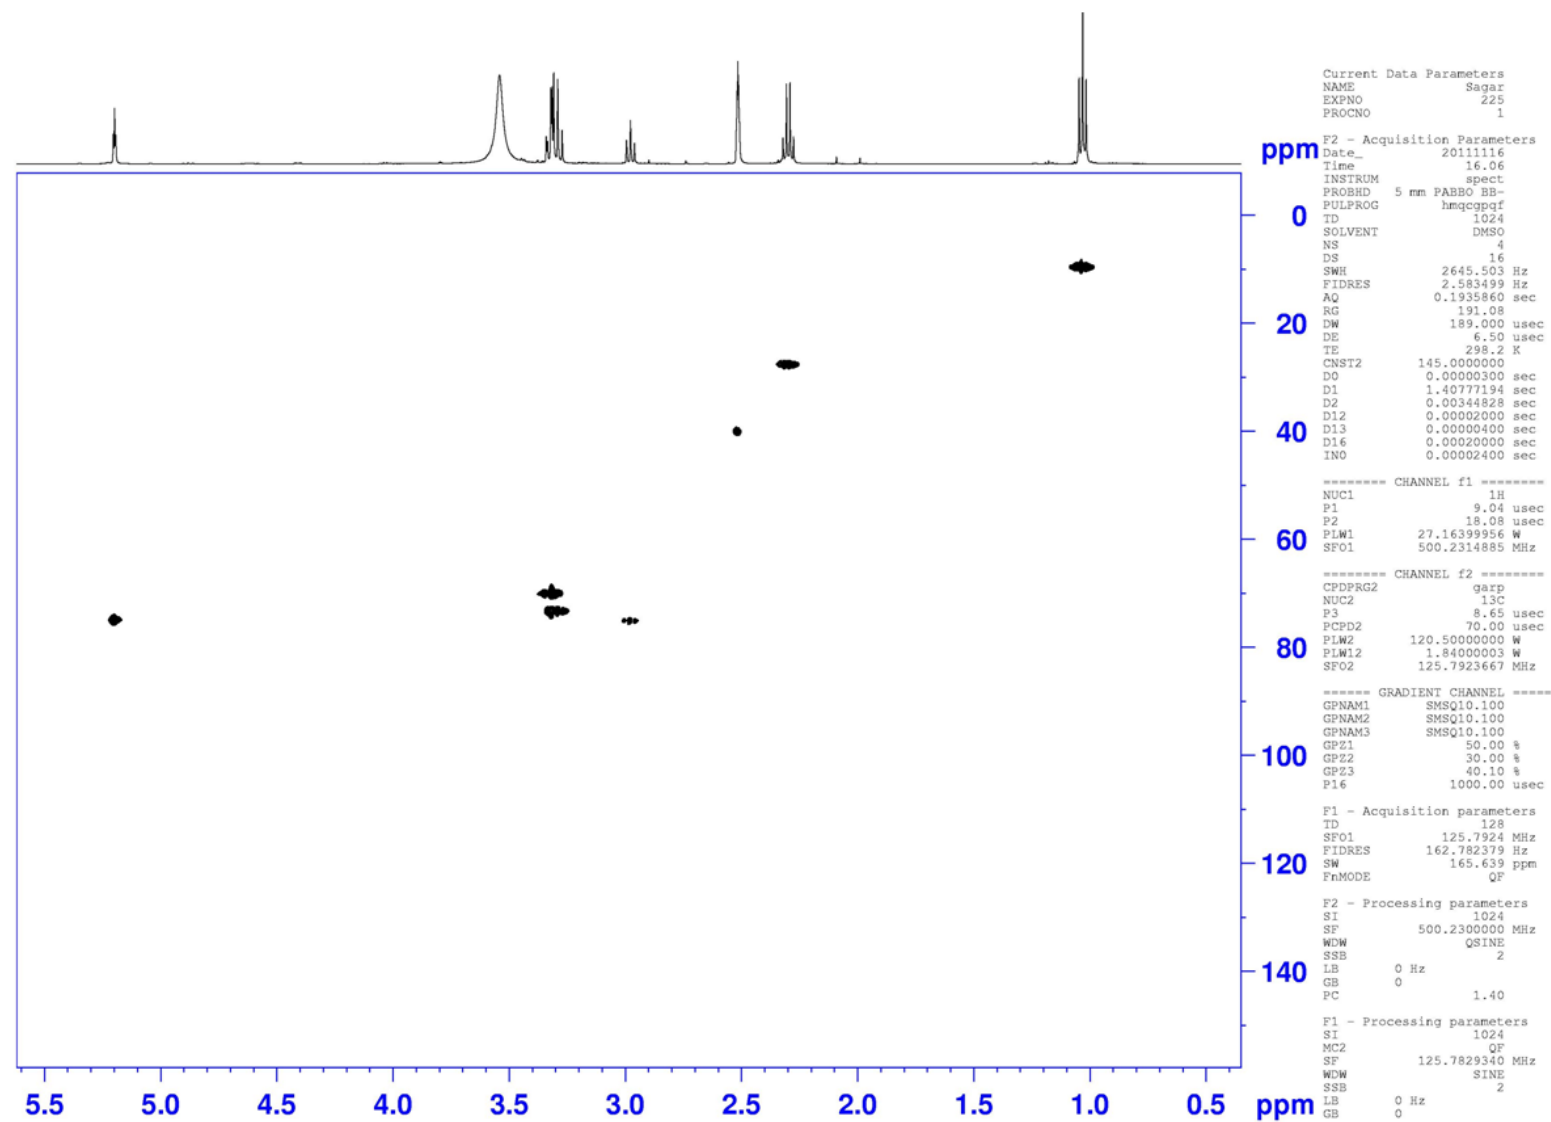

# Supplementary Information

## <sup>13</sup>C NMR of **3d** in DMSO-d<sub>6</sub>

— 173.00

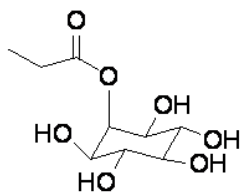

74.61  
74.46  
72.81  
69.61  
39.95  
39.89  
39.80  
39.72  
39.63  
39.55  
39.46  
39.30  
39.13  
38.96  
38.80  
27.14  
9.06

Current Data Parameters  
NAME Sagar  
EXPNO 223  
PROCNO 1

F2 - Acquisition Parameters  
Date\_ 20111116  
Time 16.03  
INSTRUM spect  
PROBHD 5 mm PABBO BB-  
PULPROG zgpg30  
TD 65536  
SOLVENT DMSO  
NS 1024  
DS 4  
SWH 29761.904 Hz  
FIDRES 0.454131 Hz  
AQ 1.1010548 sec  
RG 191.08  
DW 16.800 usec  
DE 6.50 usec  
TE 298.0 K  
D1 2.00000000 sec  
D11 0.03000000 sec

===== CHANNEL f1 =====  
NUC1 13C  
P1 8.65 usec  
PLW1 120.50000000 W  
SFO1 125.7955112 MHz

===== CHANNEL f2 =====  
CPDPRG2 waltz16  
NUC2 1H  
PCPD2 80.00 usec  
PLW2 27.16399956 W  
PLW12 0.34685999 W  
PLW13 0.22199000 W  
SFO2 500.2320009 MHz

F2 - Processing parameters  
SI 32768  
SF 125.7829969 MHz  
WDW EM  
SSB 0  
LB 1.00 Hz  
GB 0  
PC 1.40

200 180 160 140 120 100 80 60 40 20 0 ppm



# Supplementary Information

## <sup>13</sup>C NMR of **3d** (zoom)

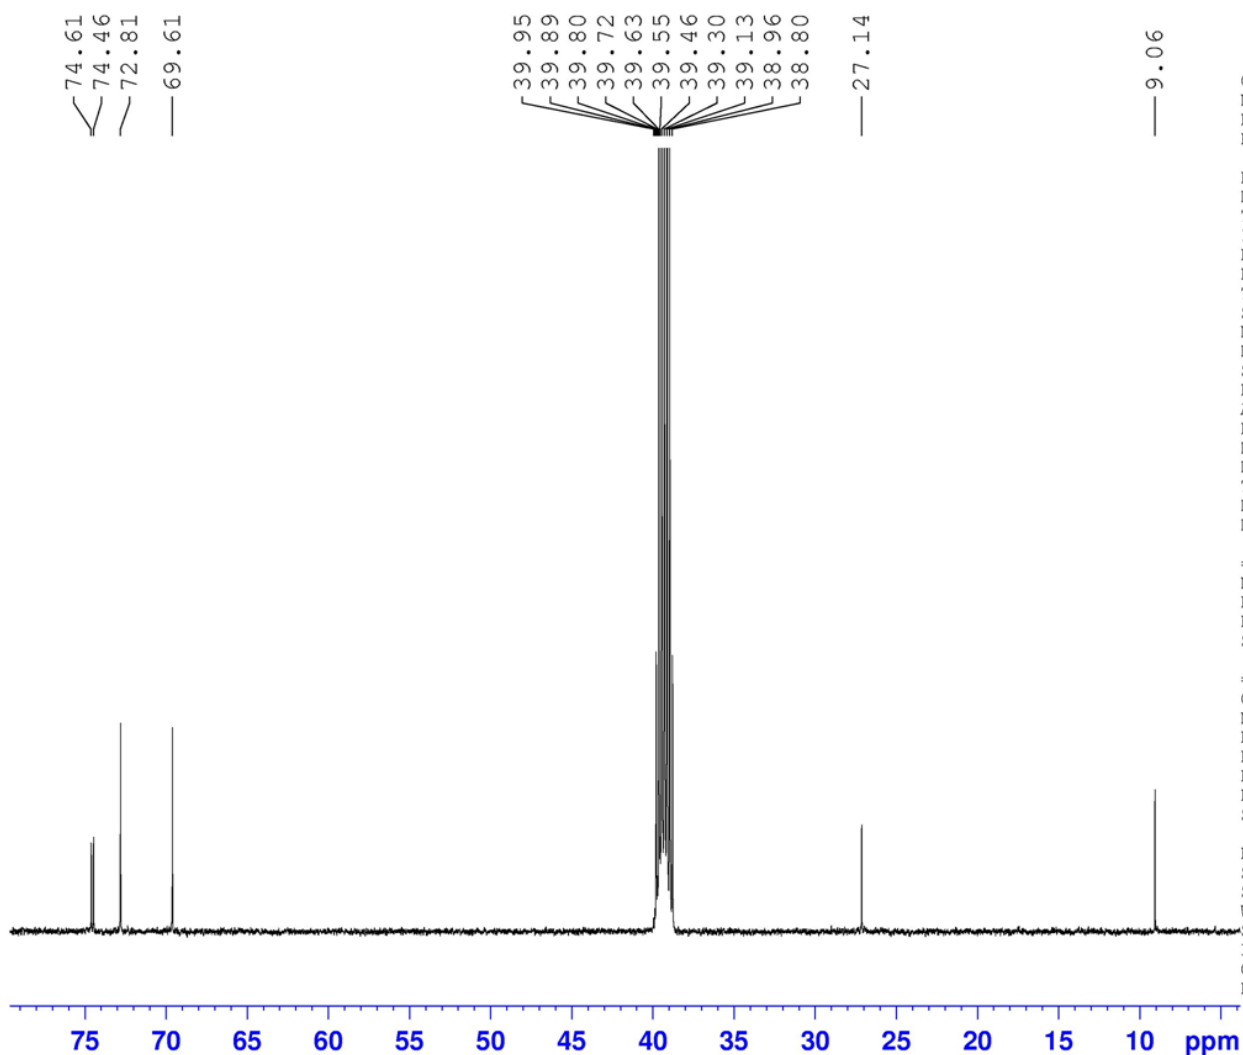

```

Current Data Parameters
NAME          Sagar
EXPNO         223
PROCNO        1

F2 - Acquisition Parameters
Date_         20111116
Time          16.03
INSTRUM       spect
PROBHD        5 mm PABBO BB-
PULPROG       zgpg30
TD            65536
SOLVENT       DMSO
NS            1024
DS            4
SWH           29761.904 Hz
FIDRES        0.454131 Hz
AQ            1.1010548 sec
RG            191.08
DW            16.800 usec
DE            6.50 usec
TE            298.0 K
D1            2.00000000 sec
D11           0.03000000 sec

===== CHANNEL f1 =====
NUC1           13C
P1             8.65 usec
PLW1          120.50000000 W
SFO1          125.7955112 MHz

===== CHANNEL f2 =====
CPDPRG2       waltz16
NUC2           1H
PCPD2         80.00 usec
PLW2          27.16399956 W
PLW12         0.34685999 W
PLW13         0.22199000 W
SFO2          500.2320009 MHz

F2 - Processing parameters
SI            32768
SF           125.7829969 MHz
WDW           EM
SSB           0
LB            1.00 Hz
GB            0
PC            1.40
    
```

# Supplementary Information

## DEPT of 3d

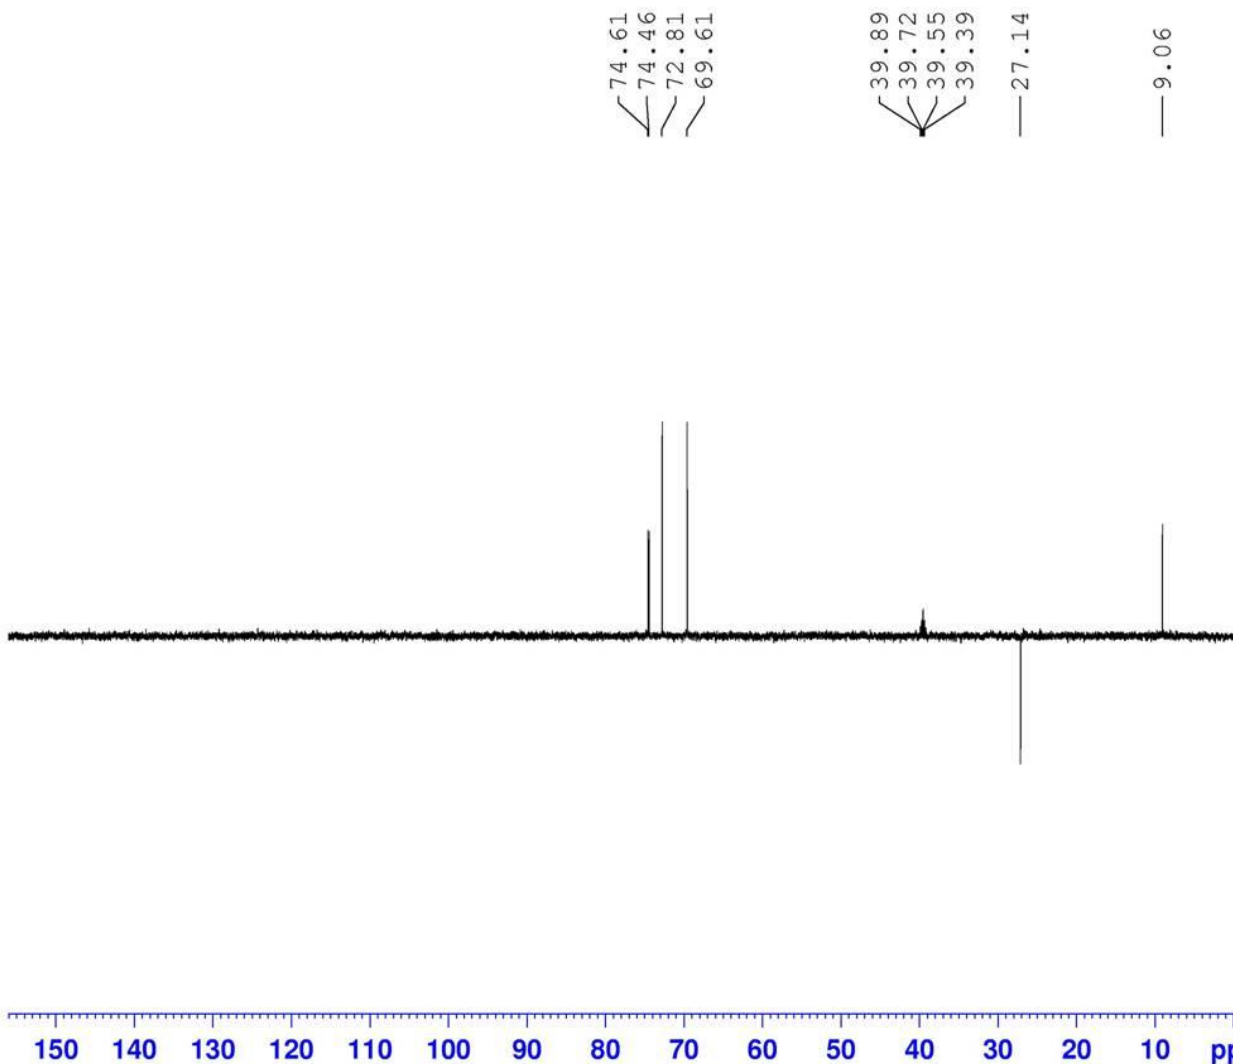

Current Data Parameters  
NAME Sagar  
EXPNO 222  
PROCNO 1

F2 - Acquisition Parameters  
Date\_ 20111116  
Time 14.58  
INSTRUM spect  
PROBHD 5 mm PABBO BB-  
PULPROG deptsp135  
TD 65536  
SOLVENT DMSO  
NS 256  
DS 4  
SWH 20161.291 Hz  
FIDRES 0.307637 Hz  
AQ 1.6253428 sec  
RG 191.08  
DW 24.800 usec  
DE 6.50 usec  
TE 298.0 K  
CNST2 145.0000000  
D1 2.00000000 sec  
D2 0.00344828 sec  
D12 0.00002000 sec

===== CHANNEL f1 =====  
NUC1 13C  
P1 8.65 usec  
P13 2000.00 usec  
PLW0 0 W  
PLW1 120.50000000 W  
SFO1 125.7929956 MHz  
SPNAM5 Crp60comp.4  
SPOAL5 0.500  
SPOFFS5 0 Hz  
SPW5 13.77600002 W

===== CHANNEL f2 =====  
CPDPRG2 waltz16  
NUC2 1H  
P3 9.03 usec  
P4 18.06 usec  
PCPD2 80.00 usec  
PLW2 27.16399956 W  
PLW12 0.34685999 W  
SFO2 500.2315998 MHz

F2 - Processing parameters  
SI 32768  
SF 125.7829969 MHz  
WDW EM  
SSB 0  
LB 1.00 Hz  
GB 0  
PC 1.40

# Supplementary Information

## <sup>1</sup>H NMR of **3e** in DMSO-d<sub>6</sub>

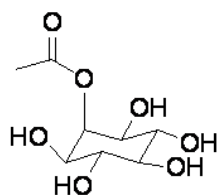

5.1894  
5.1843  
5.1793  
4.7098  
3.3375  
3.3322  
3.3180  
3.3129  
3.3071  
3.2903  
3.2708  
2.9882  
2.9712  
2.9544  
2.5199  
2.5165  
2.5130  
1.9960  
1.2977

Current Data Parameters  
NAME Amol  
EXPNO 239  
PROCNO 1

F2 - Acquisition Parameters  
Date\_ 20111117  
Time 21.06  
INSTRUM spect  
PROBHD 5 mm PABBO BB-  
PULPROG zg30  
TD 65536  
SOLVENT DMSO  
NS 64  
DS 2  
SWH 10330.578 Hz  
FIDRES 0.157632 Hz  
AQ 3.1719923 sec  
RG 85.95  
DW 48.400 usec  
DE 6.50 usec  
TE 298.1 K  
D1 1.00000000 sec

===== CHANNEL f1 =====  
NUC1 1H  
P1 9.04 usec  
PLW1 27.16399956 W  
SFO1 500.2330891 MHz

F2 - Processing parameters  
SI 65536  
SF 500.2300000 MHz  
WDW EM  
SSB 0  
LB 0.30 Hz  
GB 0  
PC 1.00

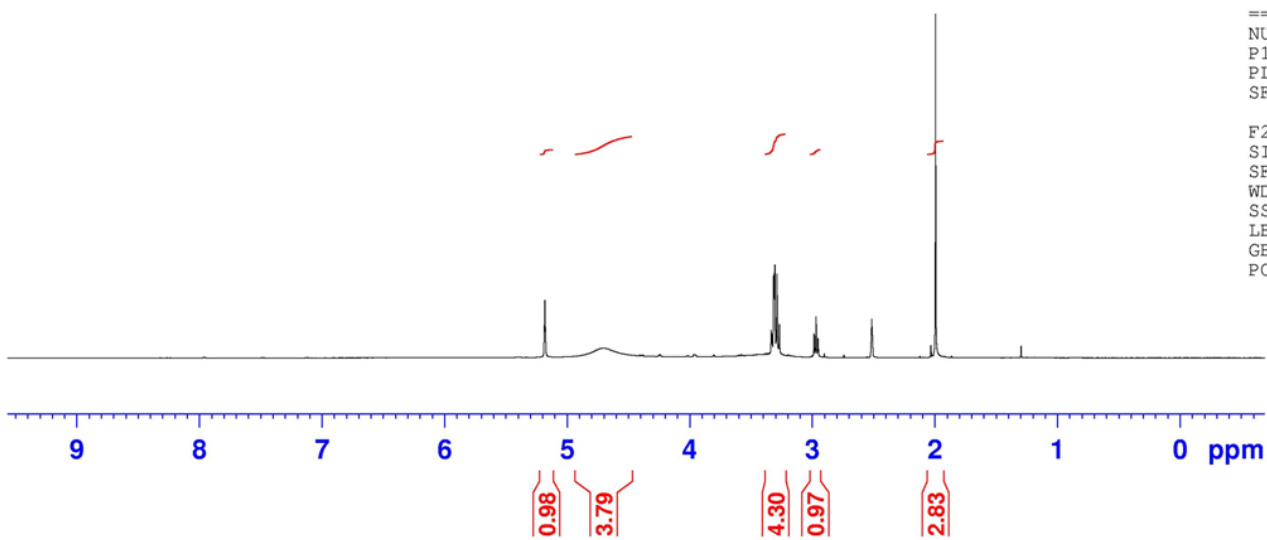

# Supplementary Information

## <sup>1</sup>H NMR of **3e** (zoom)

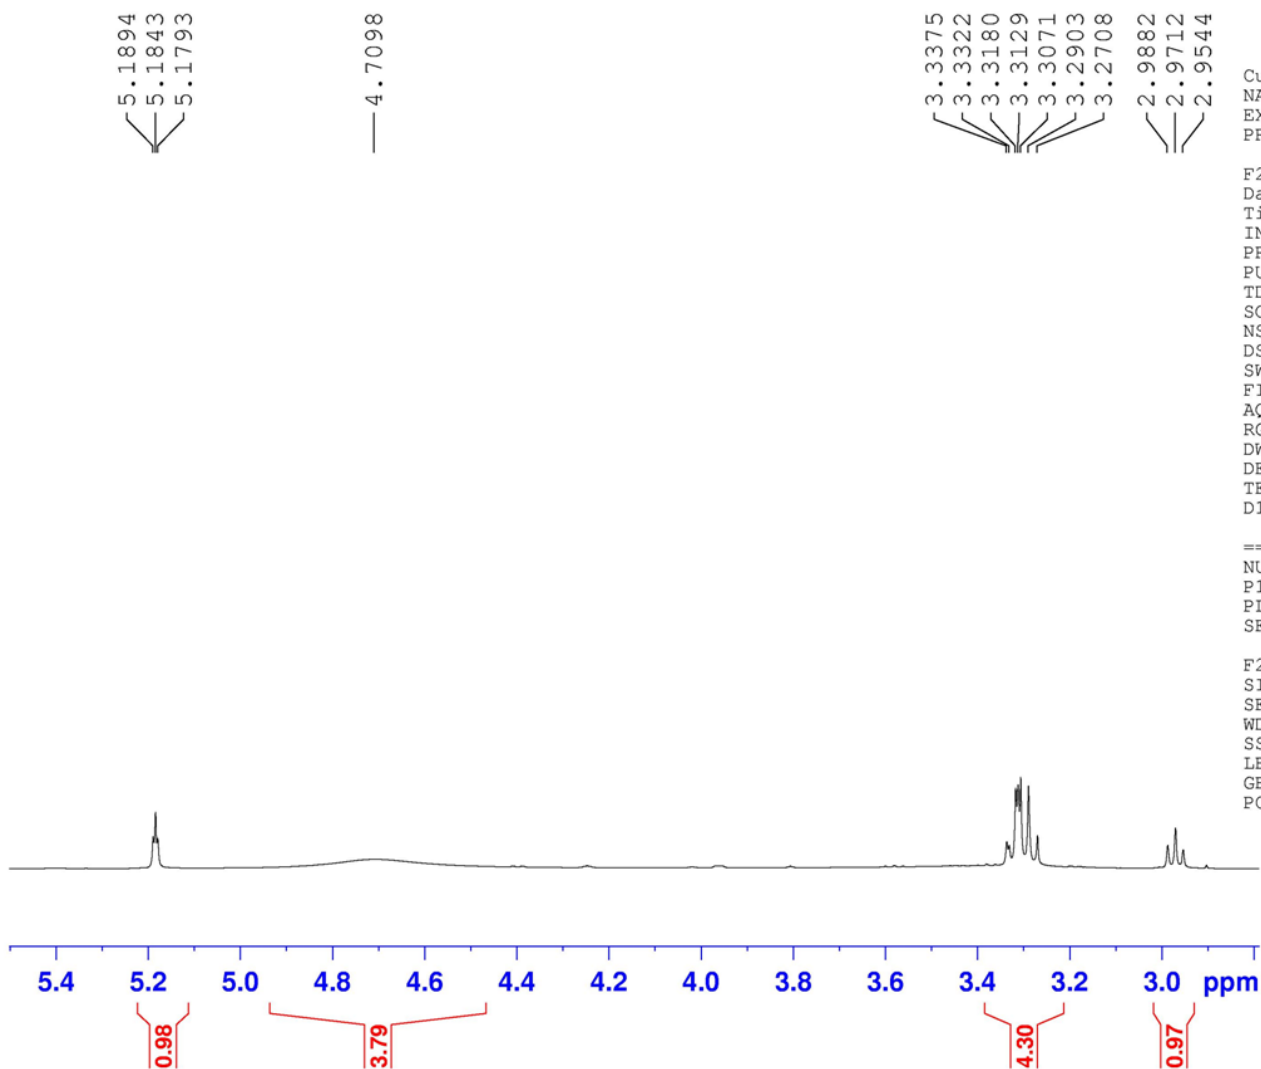

Current Data Parameters  
NAME Amol  
EXPNO 239  
PROCNO 1

F2 - Acquisition Parameters  
Date\_ 20111117  
Time 21.06  
INSTRUM spect  
PROBHD 5 mm PABBO BB-  
PULPROG zg30  
TD 65536  
SOLVENT DMSO  
NS 64  
DS 2  
SWH 10330.578 Hz  
FIDRES 0.157632 Hz  
AQ 3.1719923 sec  
RG 85.95  
DW 48.400 usec  
DE 6.50 usec  
TE 298.1 K  
D1 1.00000000 sec

===== CHANNEL f1 =====  
NUC1 1H  
P1 9.04 usec  
PLW1 27.16399956 W  
SFO1 500.2330891 MHz

F2 - Processing parameters  
SI 65536  
SF 500.2300000 MHz  
WDW EM  
SSB 0  
LB 0.30 Hz  
GB 0  
PC 1.00

# Supplementary Information

## COSY of 3e

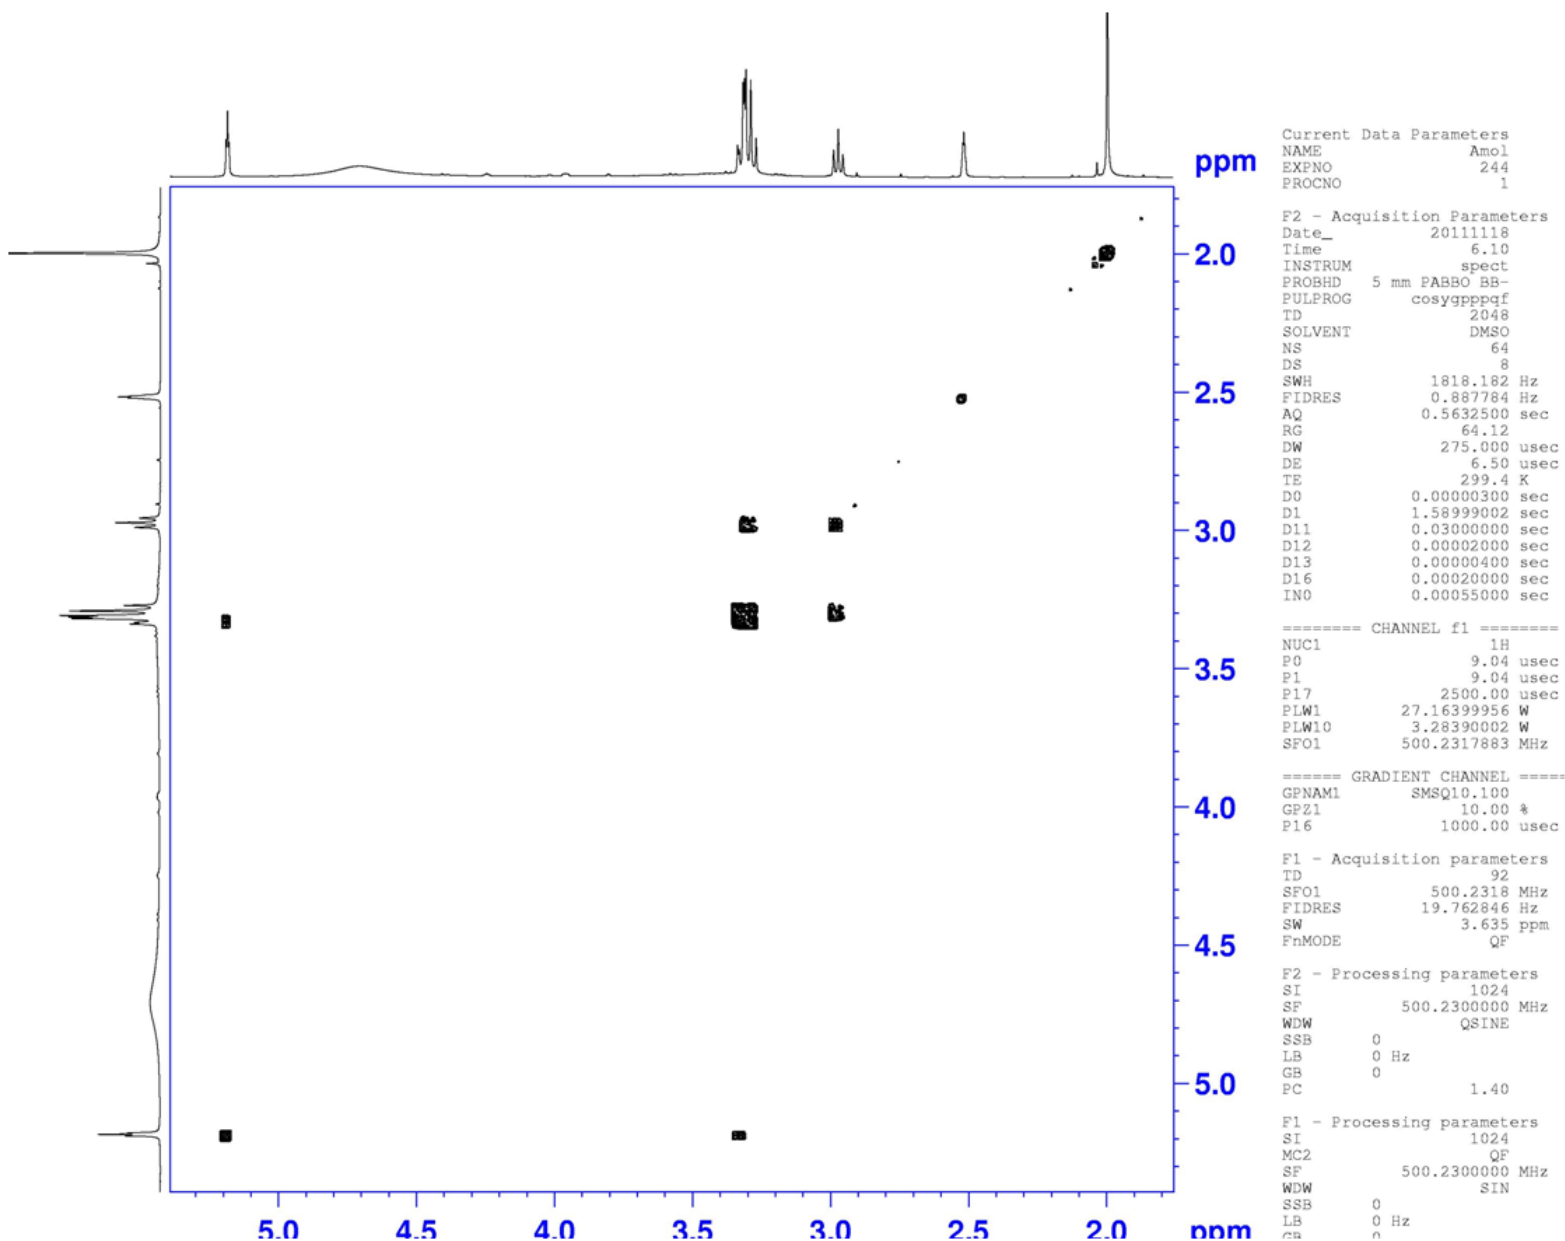

Supplementary Information

HMQC of 3e

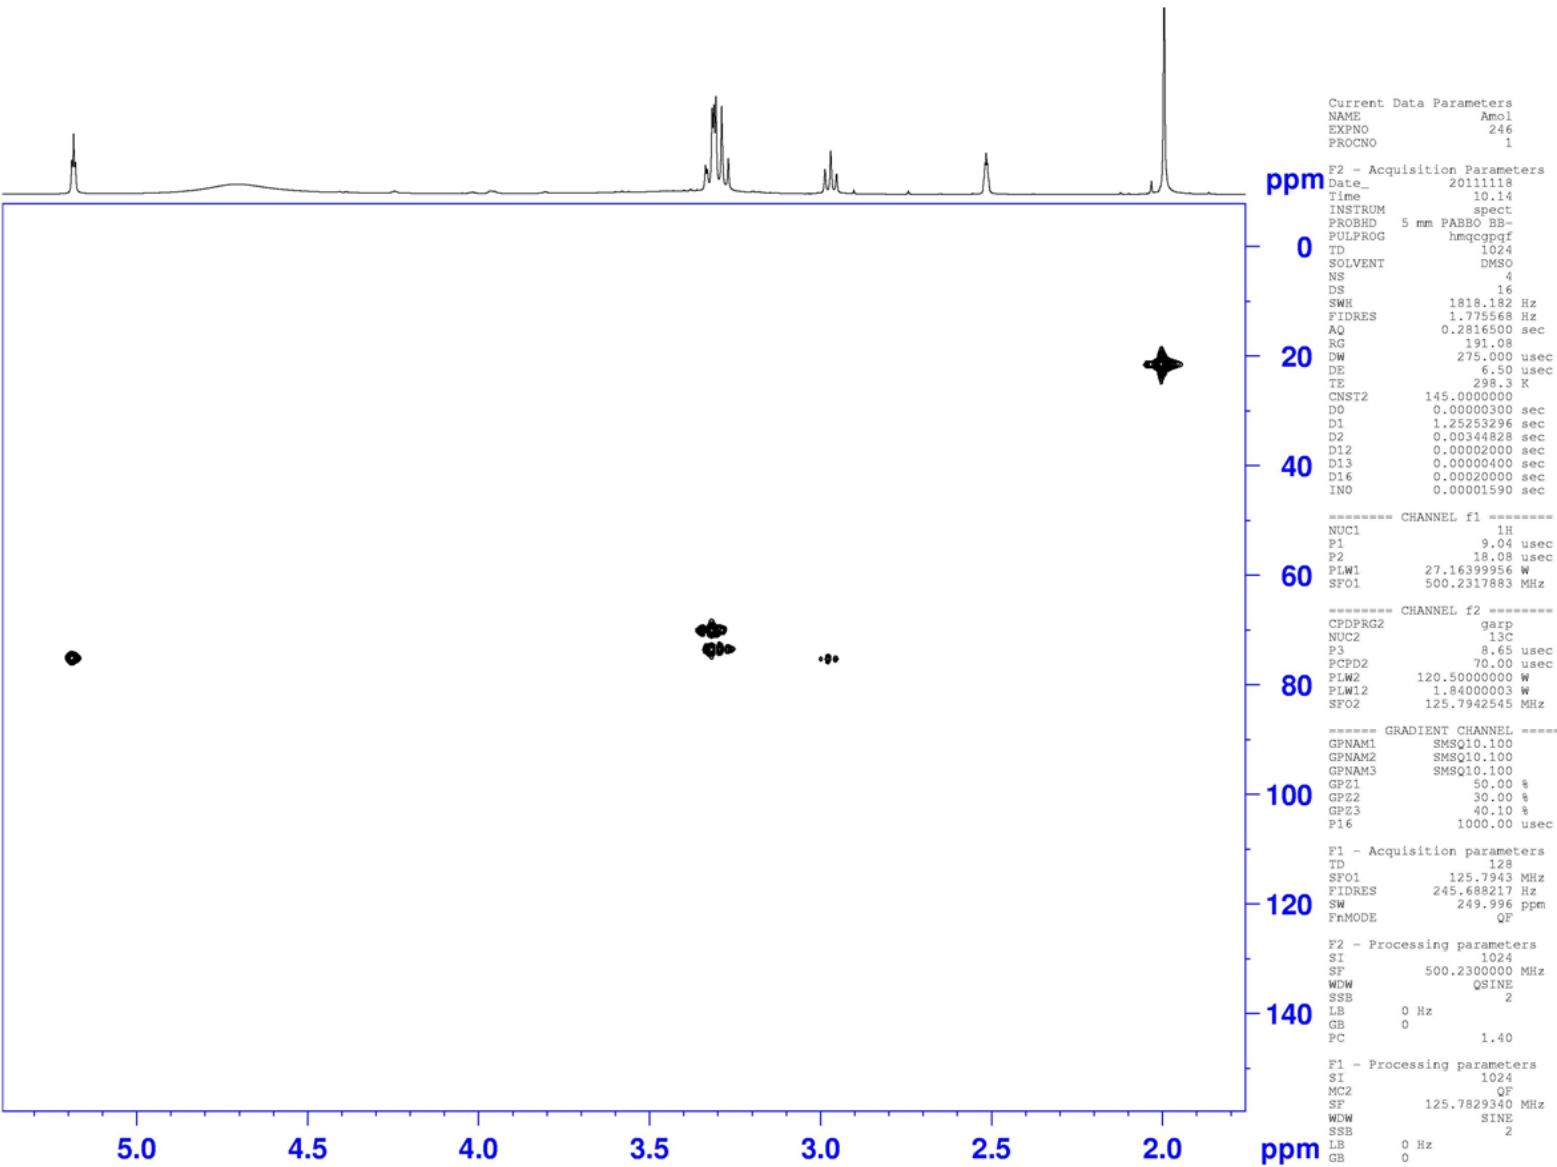

# Supplementary Information

## <sup>13</sup>C NMR of **3e** in DMSO-d<sub>6</sub>

— 169.69

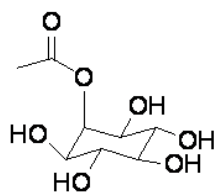

74.83  
74.68  
72.99  
69.76  
40.02  
39.86  
39.69  
39.52  
39.36  
39.19  
39.02  
21.05

Current Data Parameters  
NAME Amol  
EXPNO 243  
PROCNO 1

F2 - Acquisition Parameters  
Date\_ 20111118  
Time 6.07  
INSTRUM spect  
PROBHD 5 mm PABBO BB-  
PULPROG zgpg30  
TD 65536  
SOLVENT DMSO  
NS 10240  
DS 4  
SWH 29761.904 Hz  
FIDRES 0.454131 Hz  
AQ 1.1010548 sec  
RG 191.08  
DW 16.800 usec  
DE 6.50 usec  
TE 299.8 K  
D1 2.00000000 sec  
D11 0.03000000 sec

===== CHANNEL f1 =====  
NUC1 13C  
P1 8.65 usec  
PLW1 120.50000000 W  
SFO1 125.7955112 MHz

===== CHANNEL f2 =====  
CPDPRG2 waltz16  
NUC2 1H  
PCPD2 80.00 usec  
PLW2 27.16399956 W  
PLW12 0.34685999 W  
PLW13 0.22199000 W  
SFO2 500.2320009 MHz

F2 - Processing parameters  
SI 32768  
SF 125.7829969 MHz  
WDW EM  
SSB 0  
LB 1.00 Hz  
GB 0  
PC 1.40

200 180 160 140 120 100 80 60 40 20 0 ppm

Supplementary Information

DEPT of **3e**

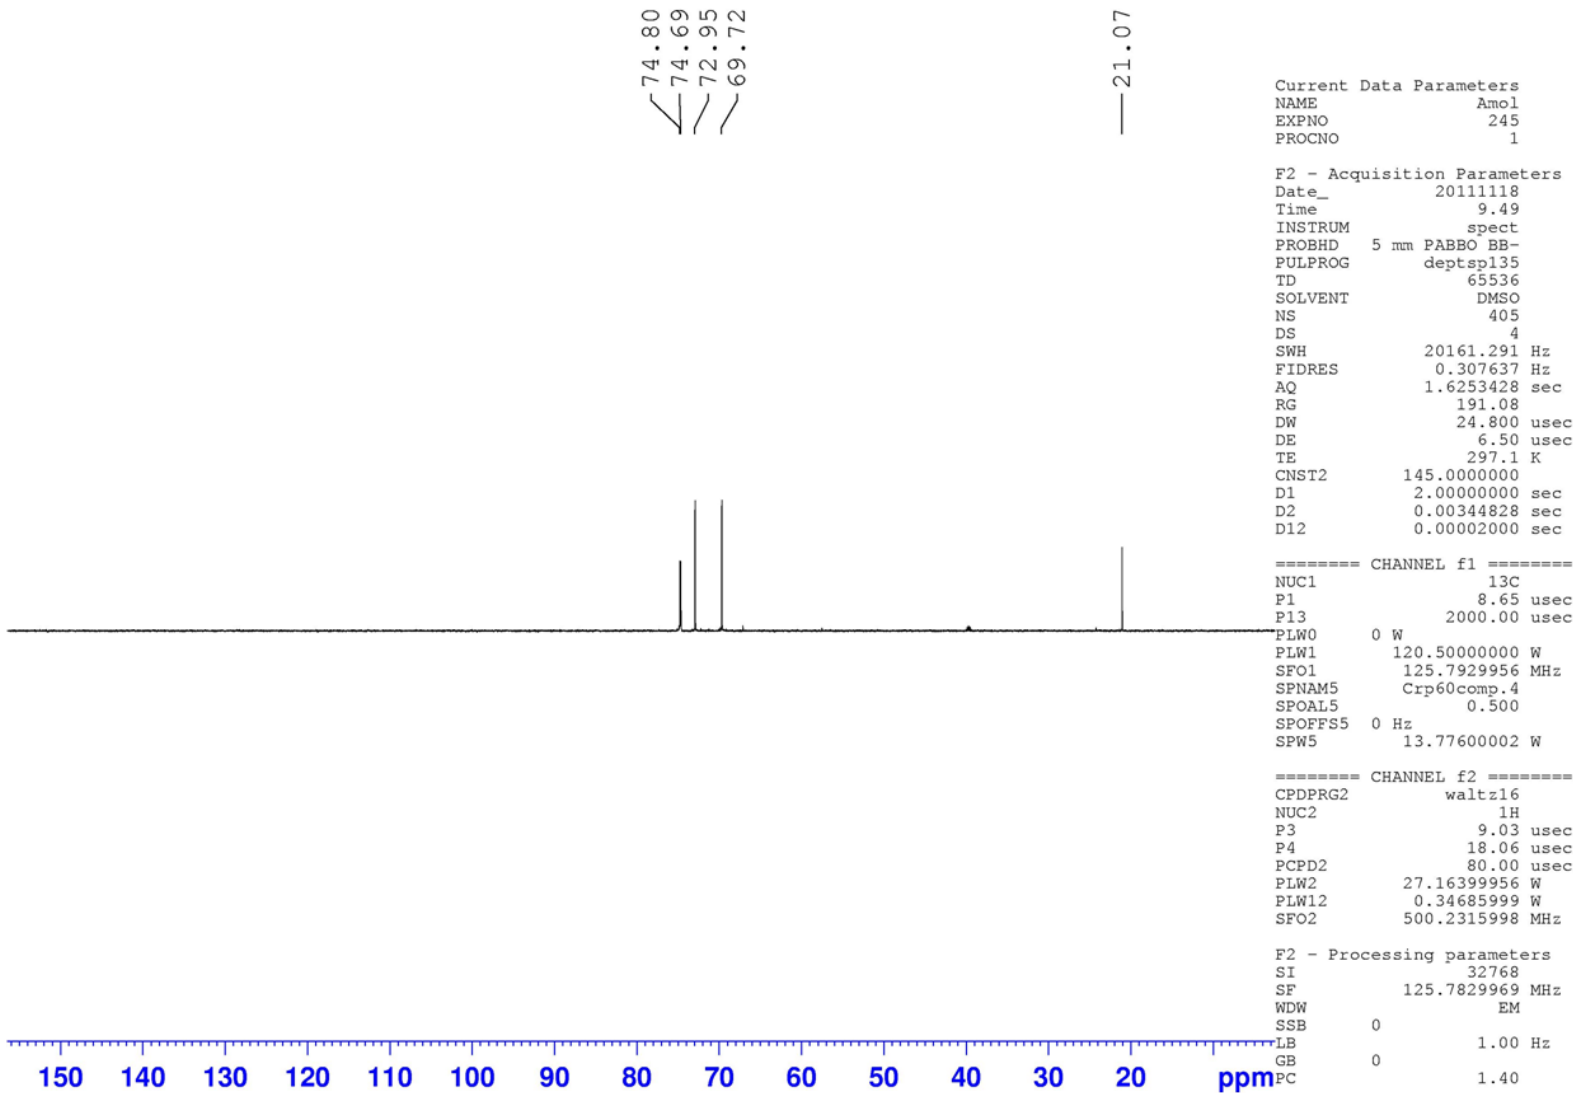



# Supplementary Information

## <sup>1</sup>H NMR of **11** in DMSO-d<sub>6</sub>

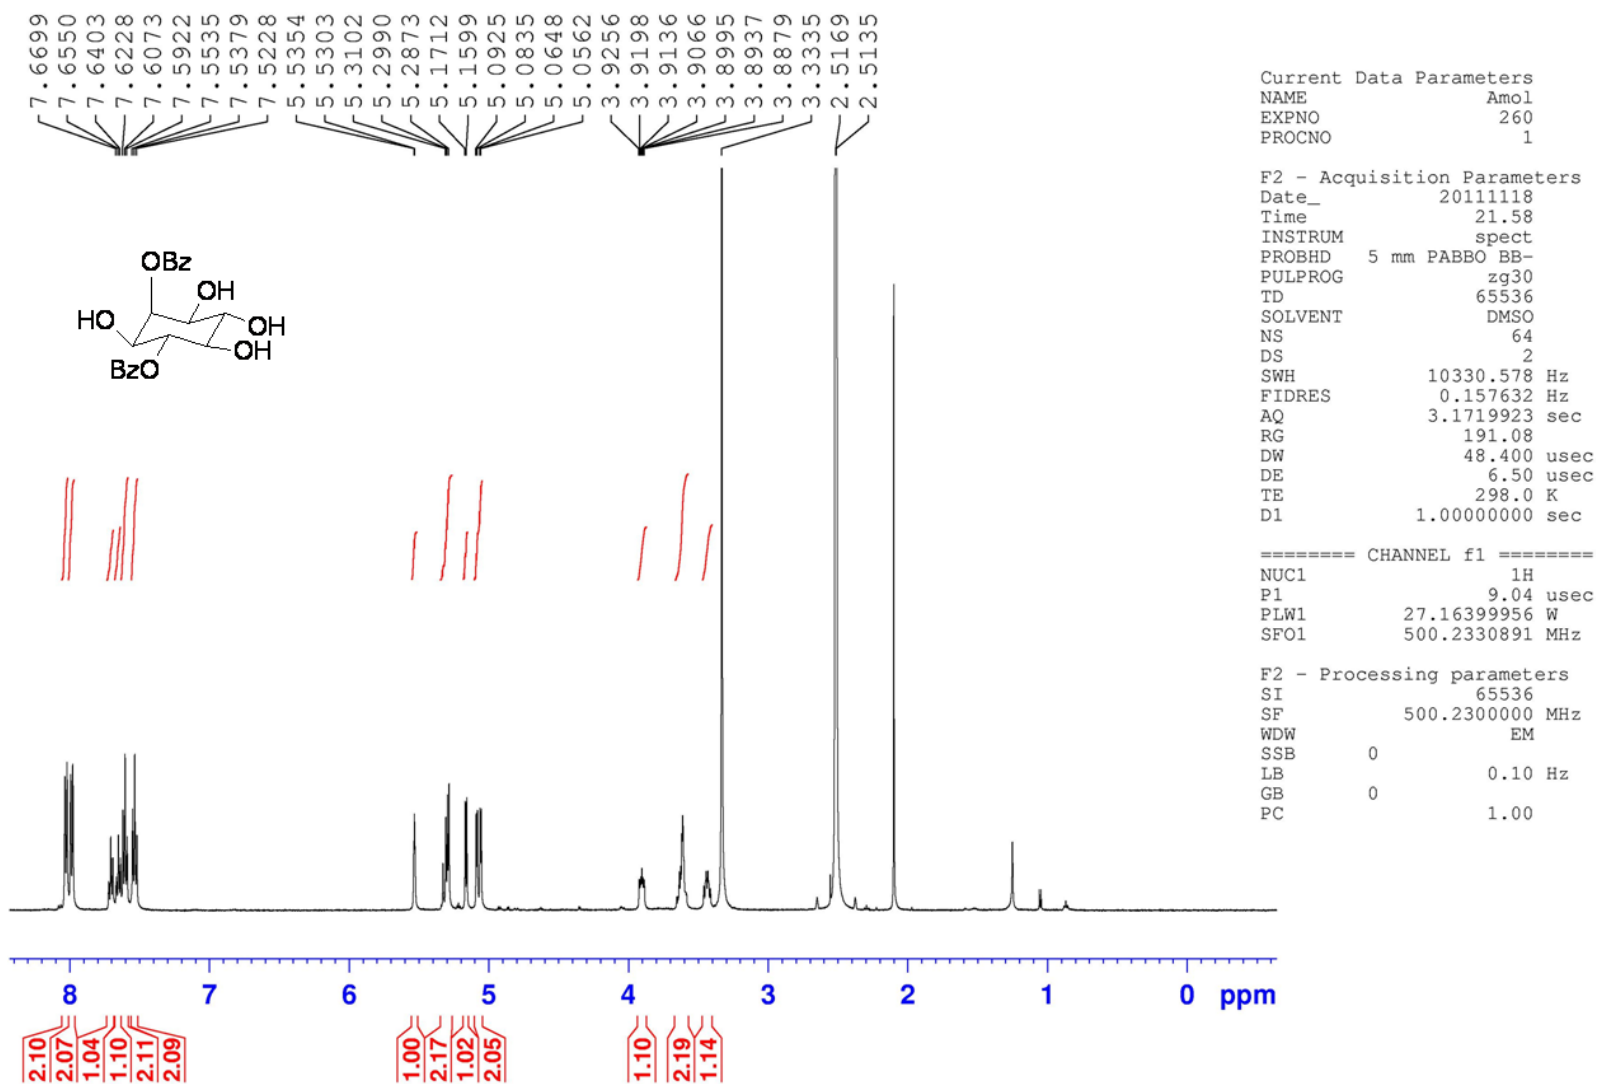

# Supplementary Information

## <sup>1</sup>H NMR of **11** in DMSO-d<sub>6</sub> (zoom)

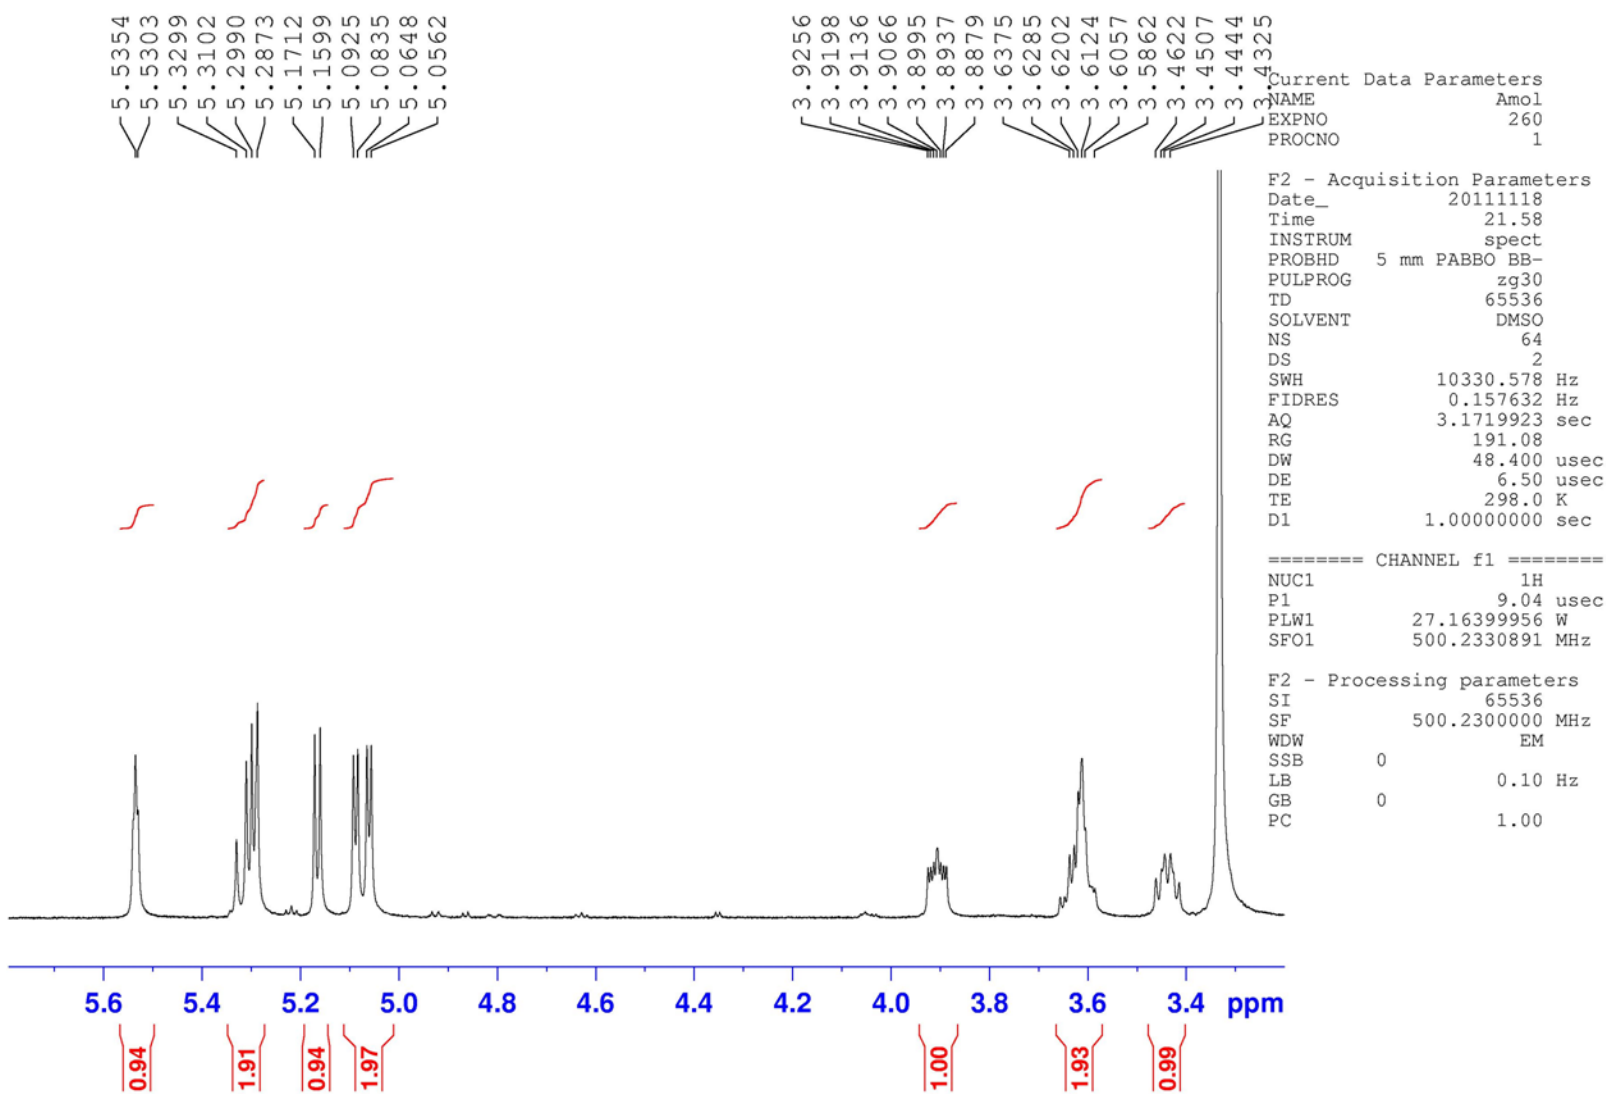

# Supplementary Information

## <sup>1</sup>H NMR of **11** in DMSO-d<sub>6</sub> (zoom)

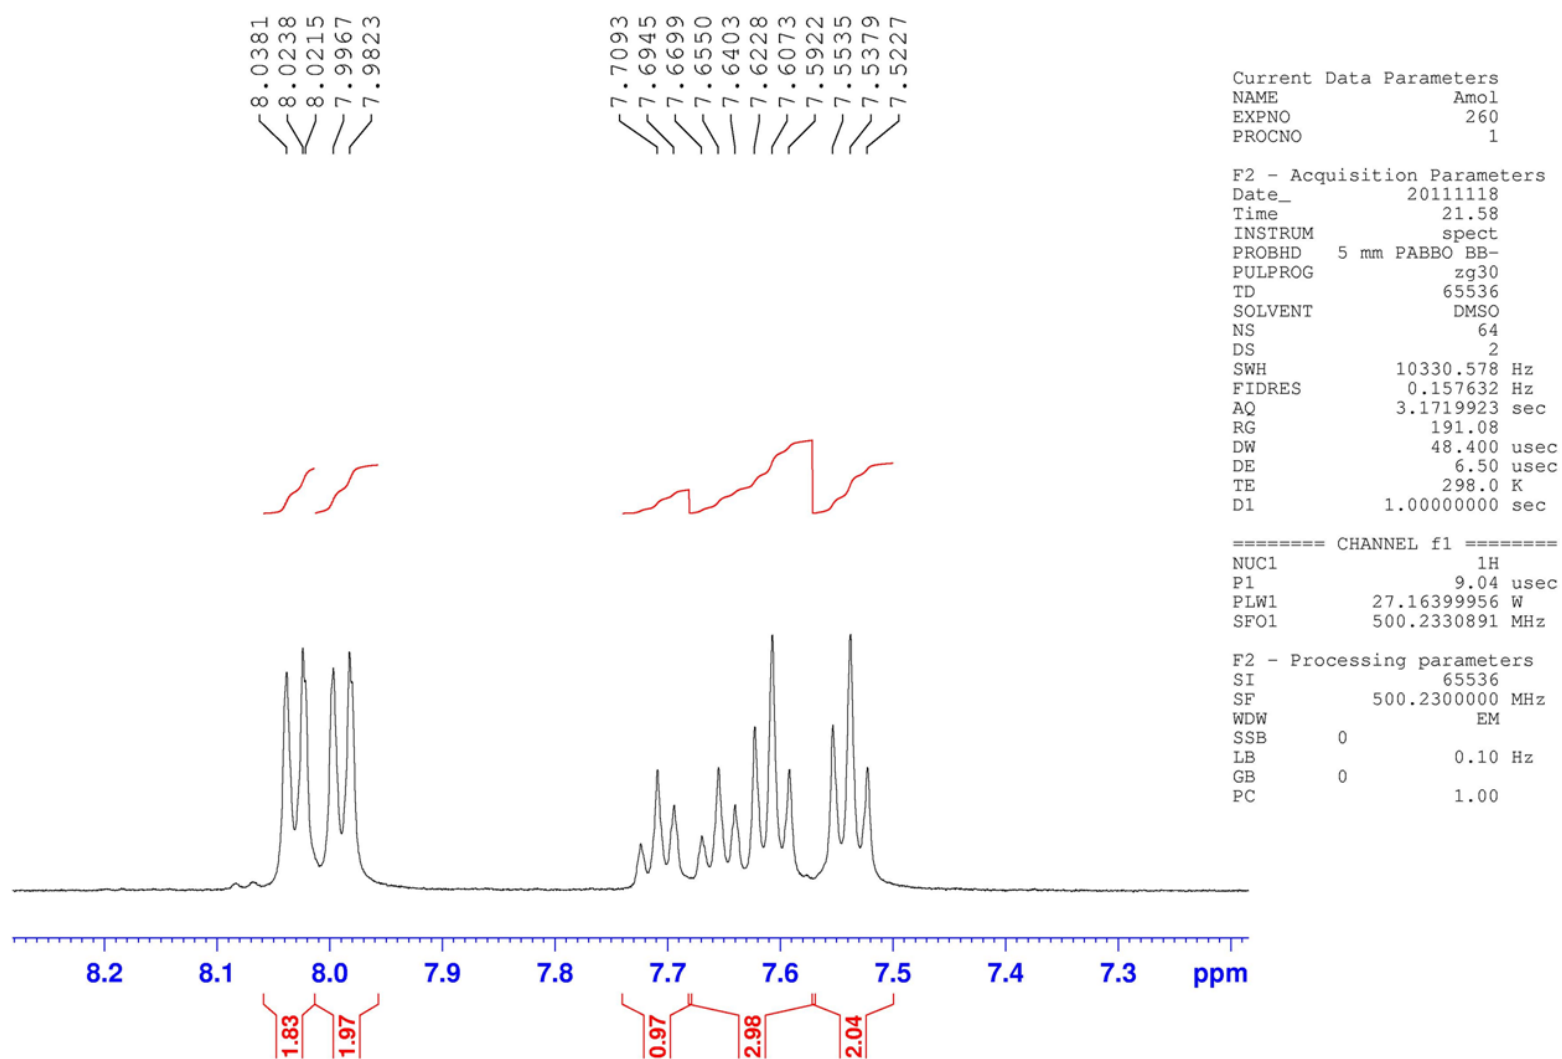

# Supplementary Information

## COSY of **11** in DMSO-d<sub>6</sub>

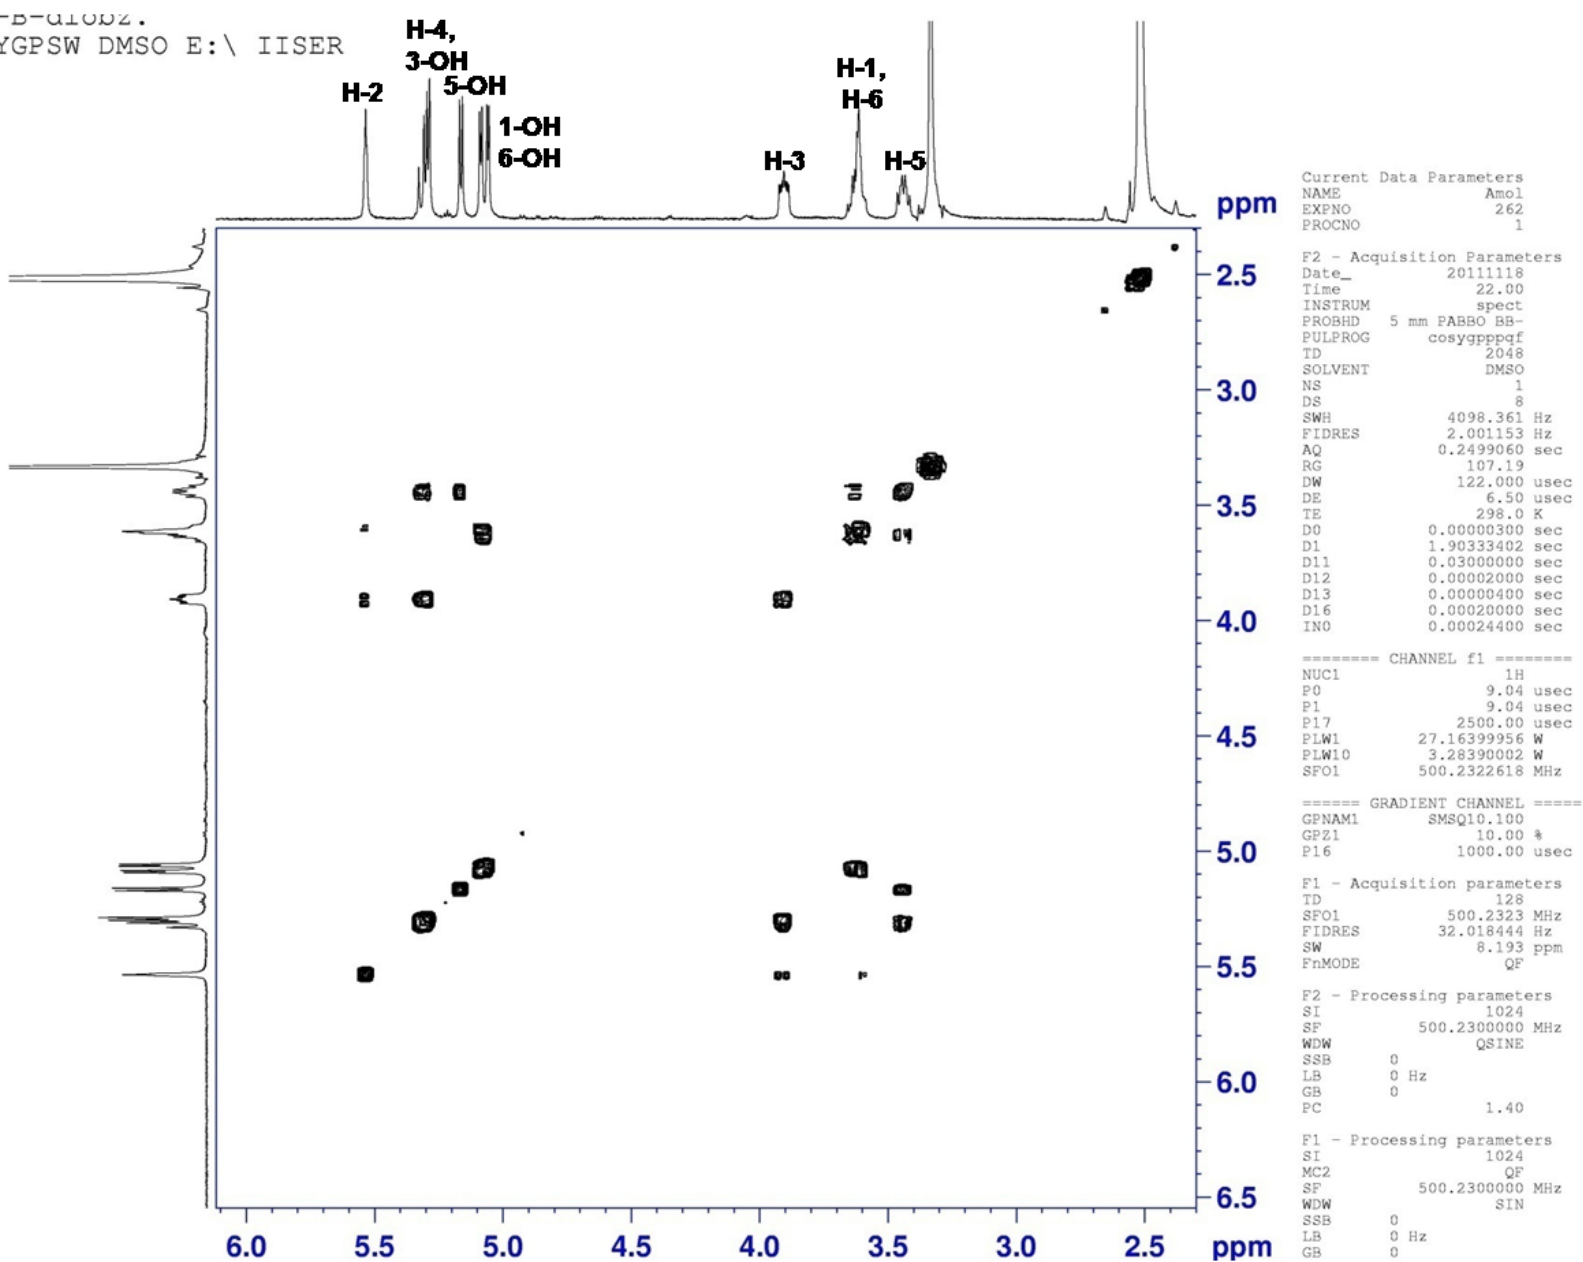

# Supplementary Information

## COSY of **11** in DMSO-d<sub>6</sub> (zoom)

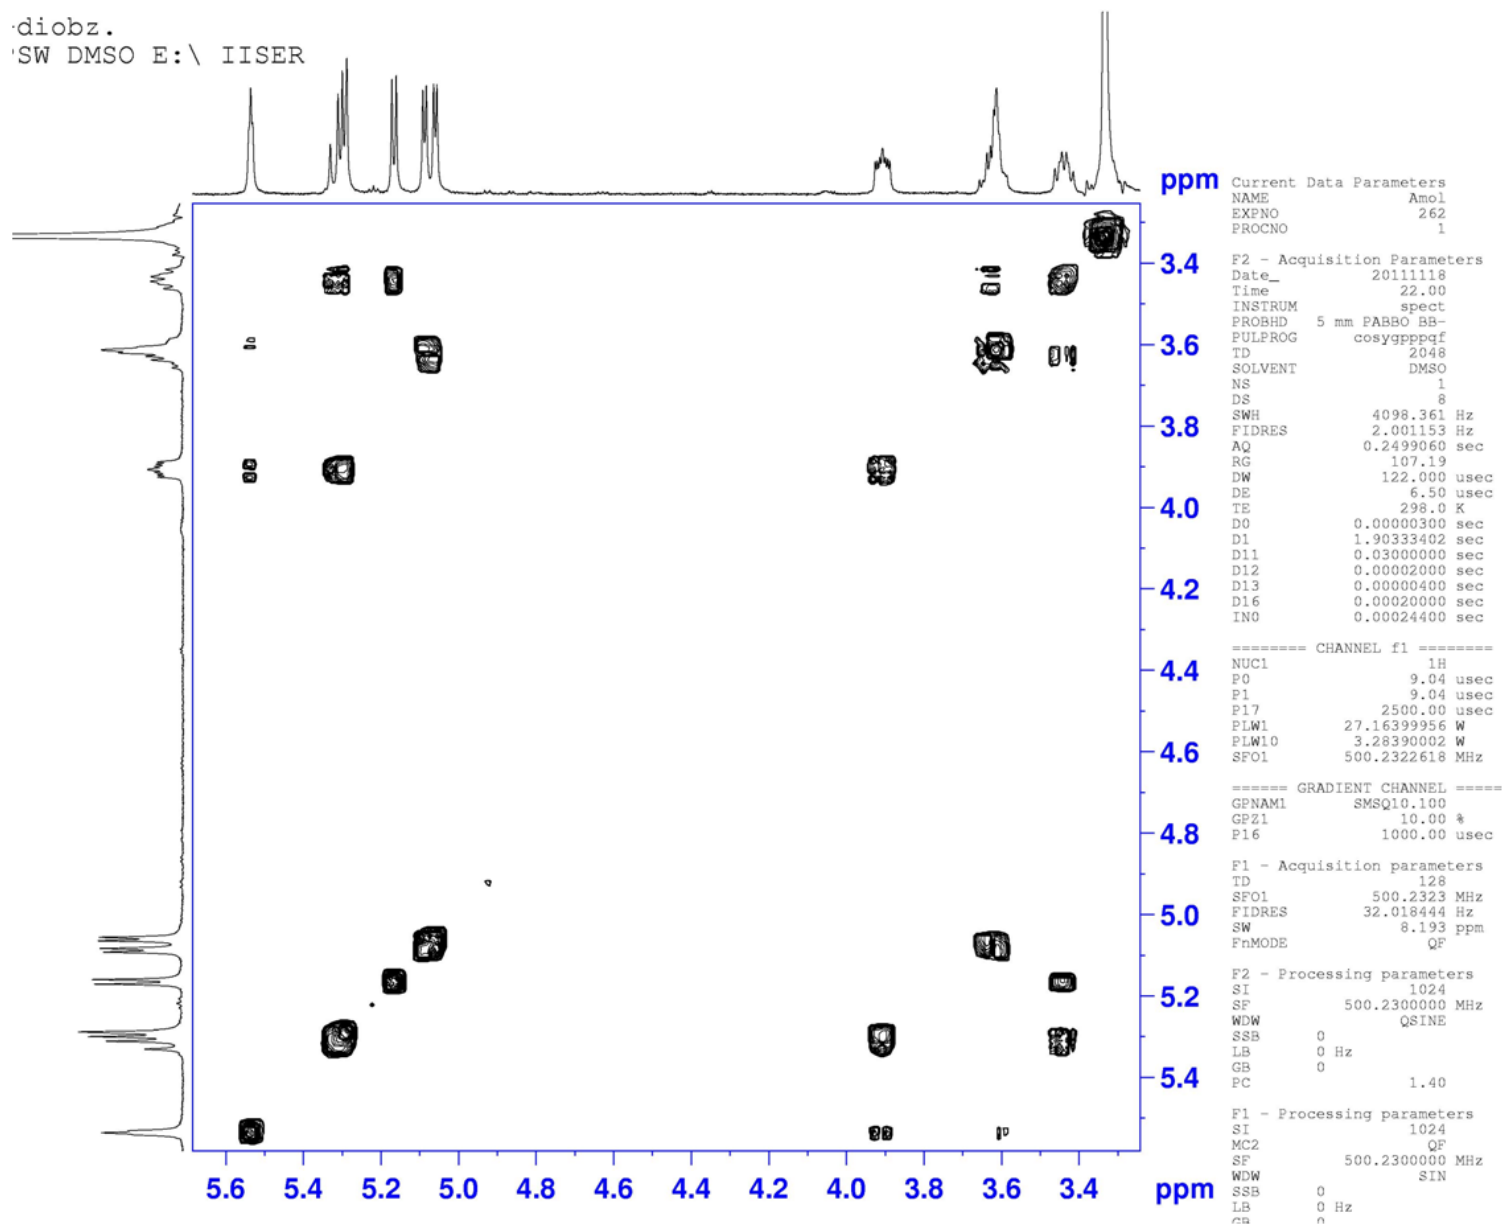

# Supplementary Information

## <sup>1</sup>H NMR of **11** in DMSO-d<sub>6</sub> (D<sub>2</sub>O Exchange)

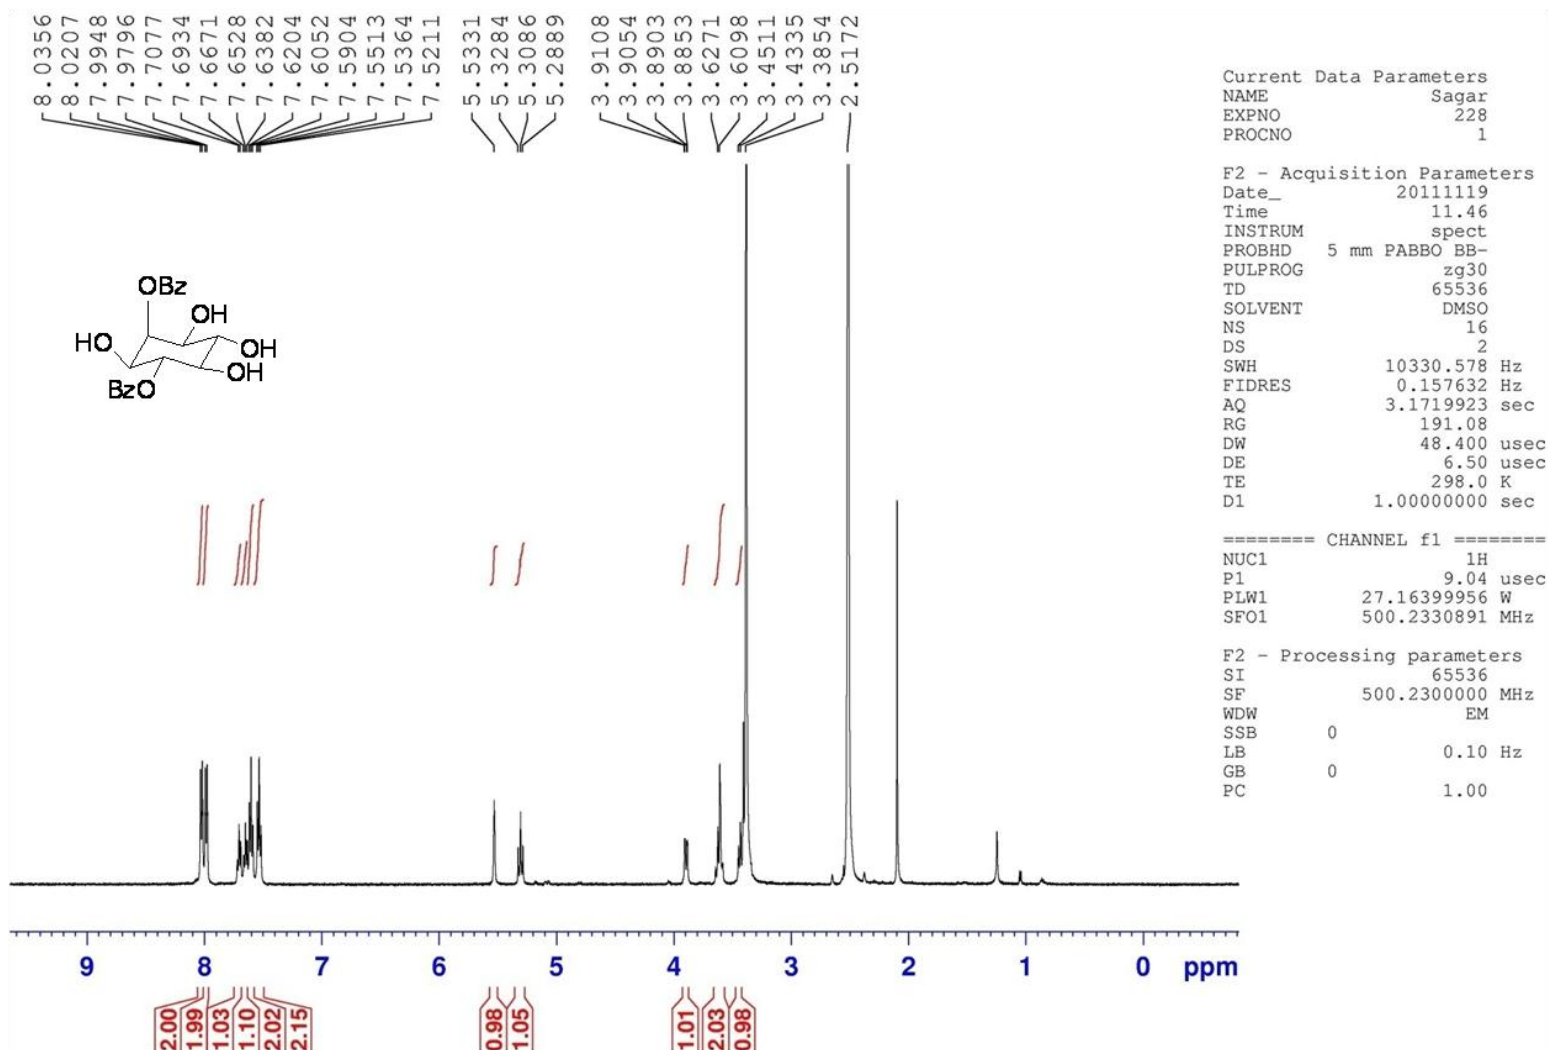

# Supplementary Information

## <sup>1</sup>H NMR of **11** in DMSO-d<sub>6</sub> (D<sub>2</sub>O Exchange) (zoom)

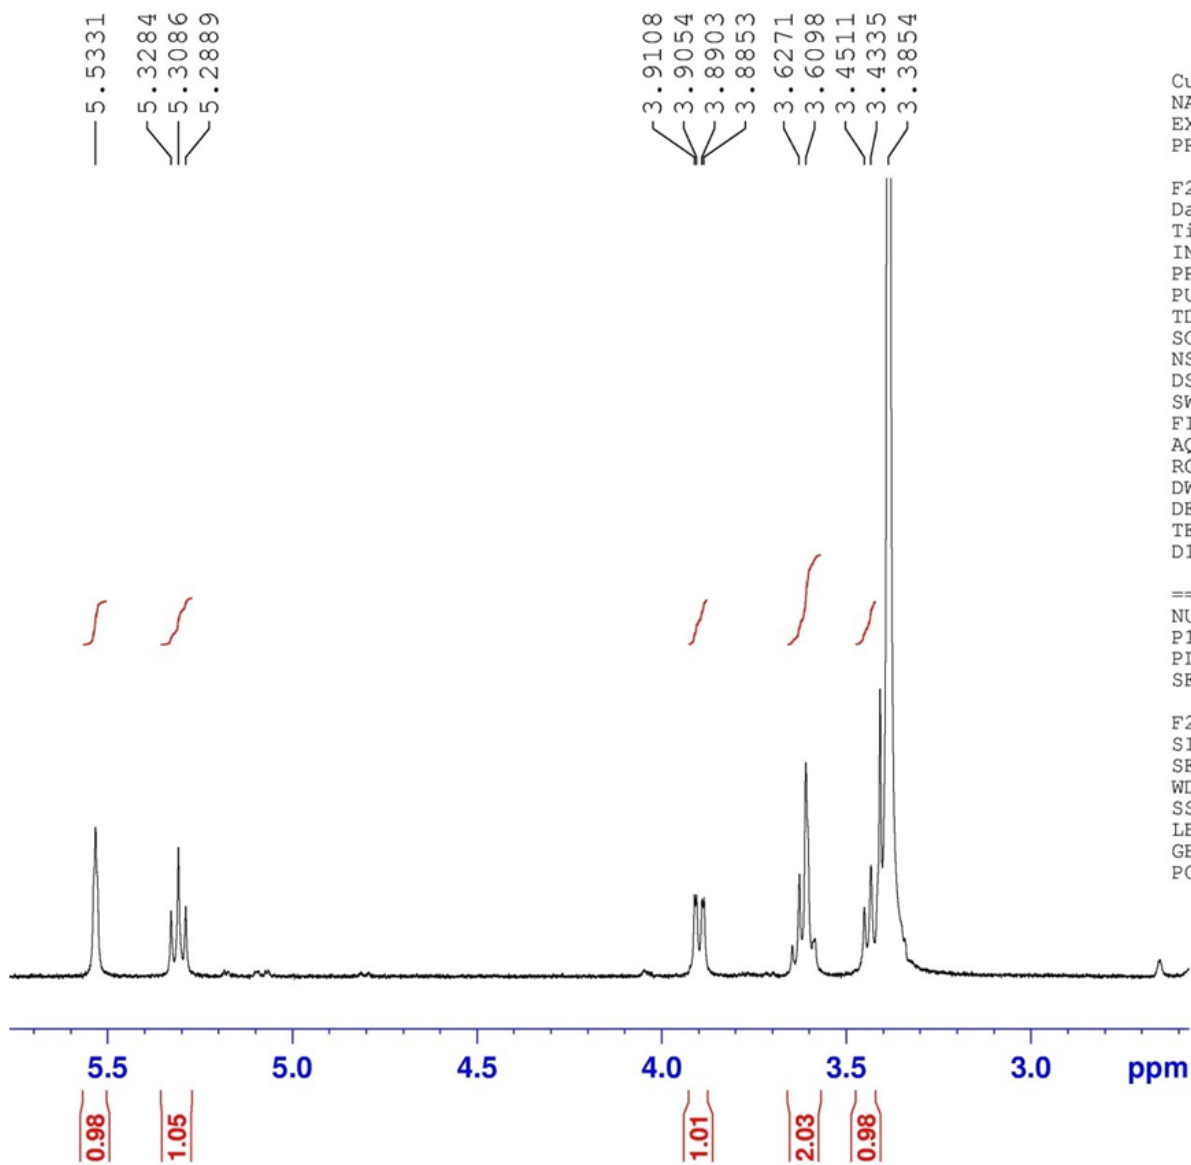

Current Data Parameters  
NAME Sagar  
EXPNO 228  
PROCNO 1

F2 - Acquisition Parameters  
Date\_ 20111119  
Time 11.46  
INSTRUM spect  
PROBHD 5 mm PABBO BB-  
PULPROG zg30  
TD 65536  
SOLVENT DMSO  
NS 16  
DS 2  
SWH 10330.578 Hz  
FIDRES 0.157632 Hz  
AQ 3.1719923 sec  
RG 191.08  
DW 48.400 usec  
DE 6.50 usec  
TE 298.0 K  
D1 1.00000000 sec

===== CHANNEL f1 =====  
NUC1 1H  
P1 9.04 usec  
PLW1 27.16399956 W  
SFO1 500.2330891 MHz

F2 - Processing parameters  
SI 65536  
SF 500.230000 MHz  
WDW EM  
SSB 0  
LB 0.10 Hz  
GB 0  
PC 1.00

# Supplementary Information

## COSY of **11** in DMSO-d<sub>6</sub> (D<sub>2</sub>O Exchange)

GPSW DMSO E:\ IISER

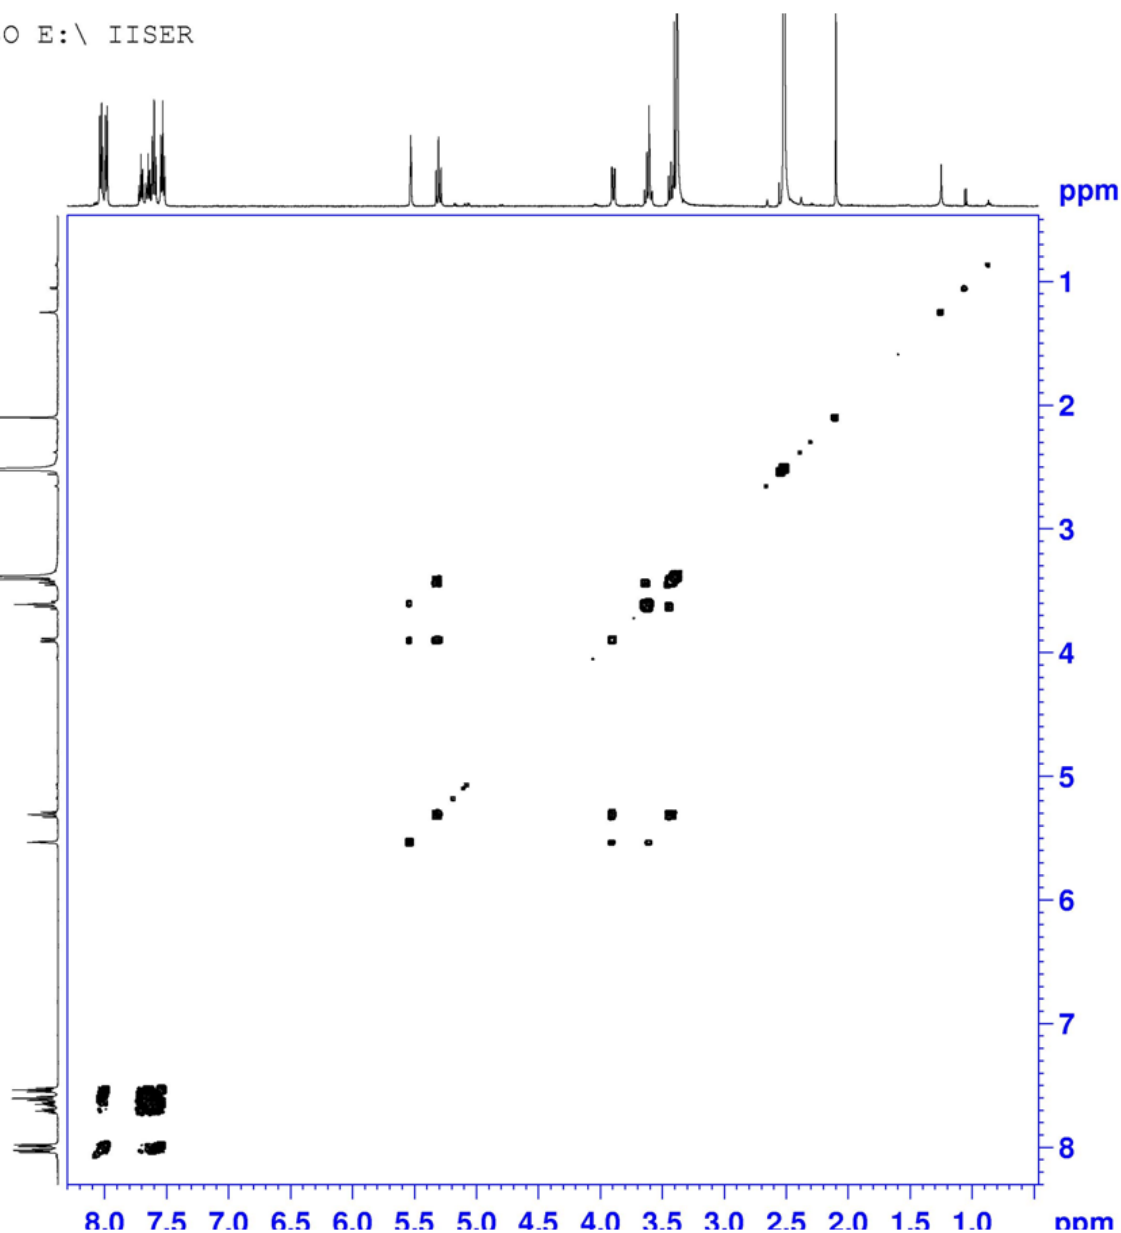

Current Data Parameters  
NAME Sagar  
EXPNO 236  
PROCNO 1

F2 - Acquisition Parameters  
Date\_ 20111119  
Time 19.01  
INSTRUM spect  
PROBHD 5 mm PABBO BB-  
PULPROG cosygpppqf  
TD 2048  
SOLVENT DMSO  
NS 1  
DS 8  
SWH 4065.041 Hz  
FIDRES 1.984883 Hz  
AQ 0.2519540 sec  
RG 107.19  
DW 123.000 use  
DE 6.50 use  
TE 298.3 K  
D0 0.0000300 sec  
D1 1.90128601 sec  
D11 0.03000000 sec  
D12 0.00002000 sec  
D13 0.00000400 sec  
D16 0.00020000 sec  
IN0 0.00024600 sec

===== CHANNEL f1 =====  
NUC1 1H  
P0 9.04 use  
P1 9.04 use  
P17 2500.00 use  
PLW1 27.16399956 W  
PLW10 3.28390002 W  
SFO1 500.2322653 MHz

===== GRADIENT CHANNEL =====  
GPNAM1 SMSQ10.100  
GPZ1 10.00 %  
P16 1000.00 use

F1 - Acquisition parameters  
TD 128  
SFO1 500.2323 MHz  
FIDRES 31.758131 Hz  
SW 8.126 ppm  
FnMODE QF

F2 - Processing parameters  
SI 1024  
SF 500.2300000 MHz  
WDW QSINE  
SSB 0  
LB 0 Hz  
GB 0  
PC 1.40

F1 - Processing parameters  
SI 1024  
MC2 QF  
SF 500.2300000 MHz  
WDW SIN  
SSB 0  
LB 0 Hz  
GB 0



# Supplementary Information

## COSY of **11** in DMSO-d<sub>6</sub> (D<sub>2</sub>O Exchange) (zoom)

YGPSW DMSO E:\ IISER

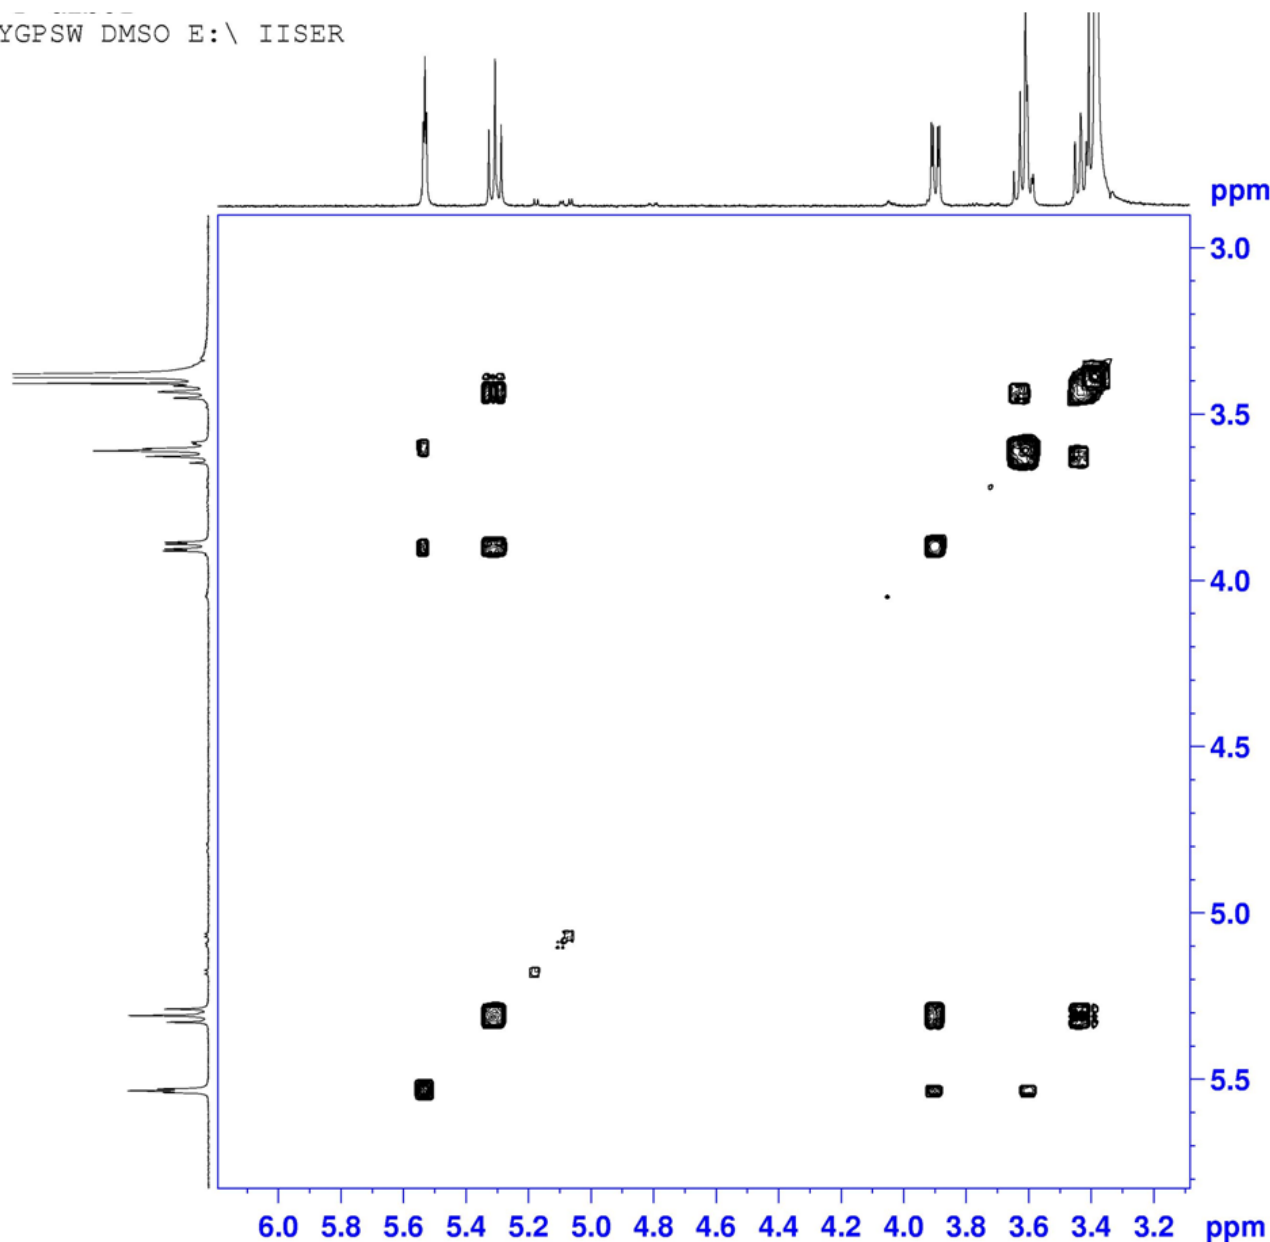

Current Data Parameters  
NAME Sagar  
EXPNO 236  
PROCNO 1

F2 - Acquisition Parameters  
Date\_ 20111119  
Time 19.01  
INSTRUM spect  
PROBHD 5 mm PABBO BB-  
PULPROG cosygpppqf  
TD 2048  
SOLVENT DMSO  
NS 1  
DS 8  
SWH 4065.041 Hz  
FIDRES 1.984883 Hz  
AQ 0.2519540 sec  
RG 107.19  
DW 123.000 usec  
DE 6.50 usec  
TE 298.3 K  
D0 0.00000300 sec  
D1 1.90128601 sec  
D11 0.03000000 sec  
D12 0.00002000 sec  
D13 0.00000400 sec  
D16 0.00020000 sec  
IN0 0.00024600 sec

===== CHANNEL f1 =====  
NUC1 1H  
P0 9.04 usec  
P1 9.04 usec  
P17 2500.00 usec  
PLW1 27.16399956 W  
PLW10 3.28390002 W  
SFO1 500.2322653 MHz

===== GRADIENT CHANNEL =====  
GPNAM1 SMSQ10.100  
GPZ1 10.00 %  
P16 1000.00 usec

F1 - Acquisition parameters  
TD 128  
SFO1 500.2323 MHz  
FIDRES 31.758131 Hz  
SW 8.126 ppm  
FnMODE QF

F2 - Processing parameters  
SI 1024  
SF 500.2300000 MHz  
WDW QSINE  
SSB 0  
LB 0 Hz  
GB 0  
PC 1.40

F1 - Processing parameters  
SI 1024  
MC2 QF  
SF 500.2300000 MHz  
WDW SIN  
SSB 0  
LB 0 Hz  
GB 0

# Supplementary Information

## <sup>1</sup>H NMR of **11** in CD<sub>3</sub>OD

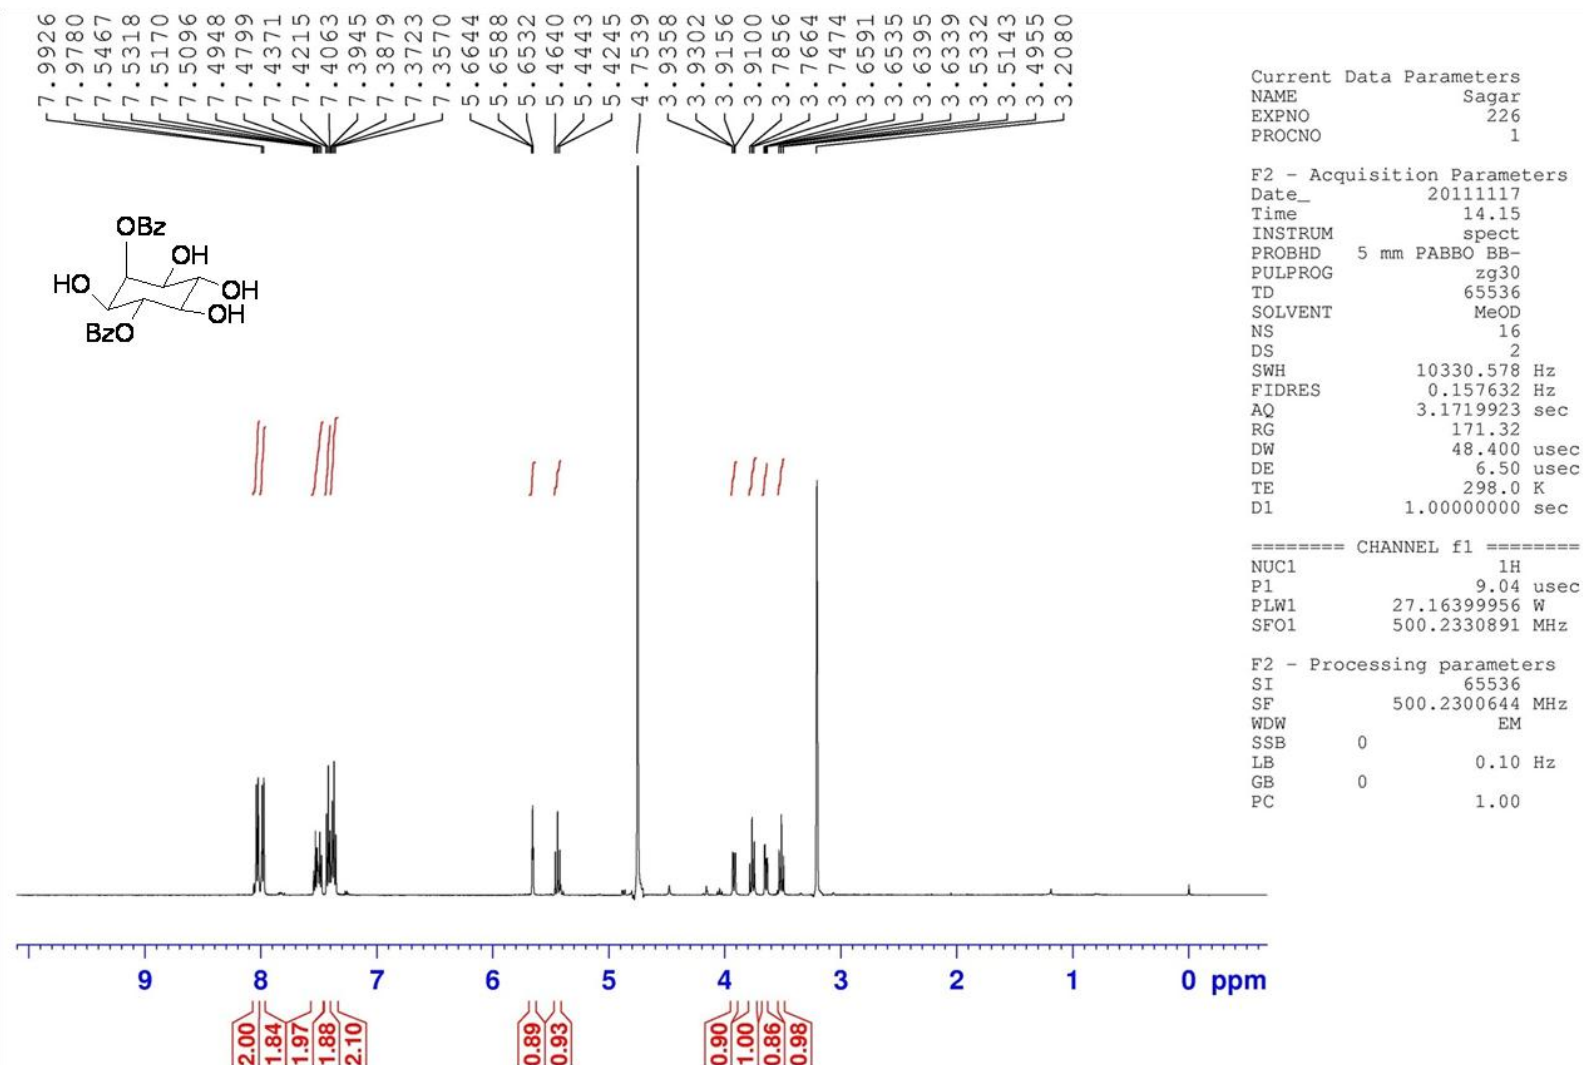

The minor peaks in the spectrum are due to the transesterification of dibenzoate in the presence of methanol.

# Supplementary Information

## <sup>1</sup>H NMR of **11** in in CD<sub>3</sub>OD (zoom)

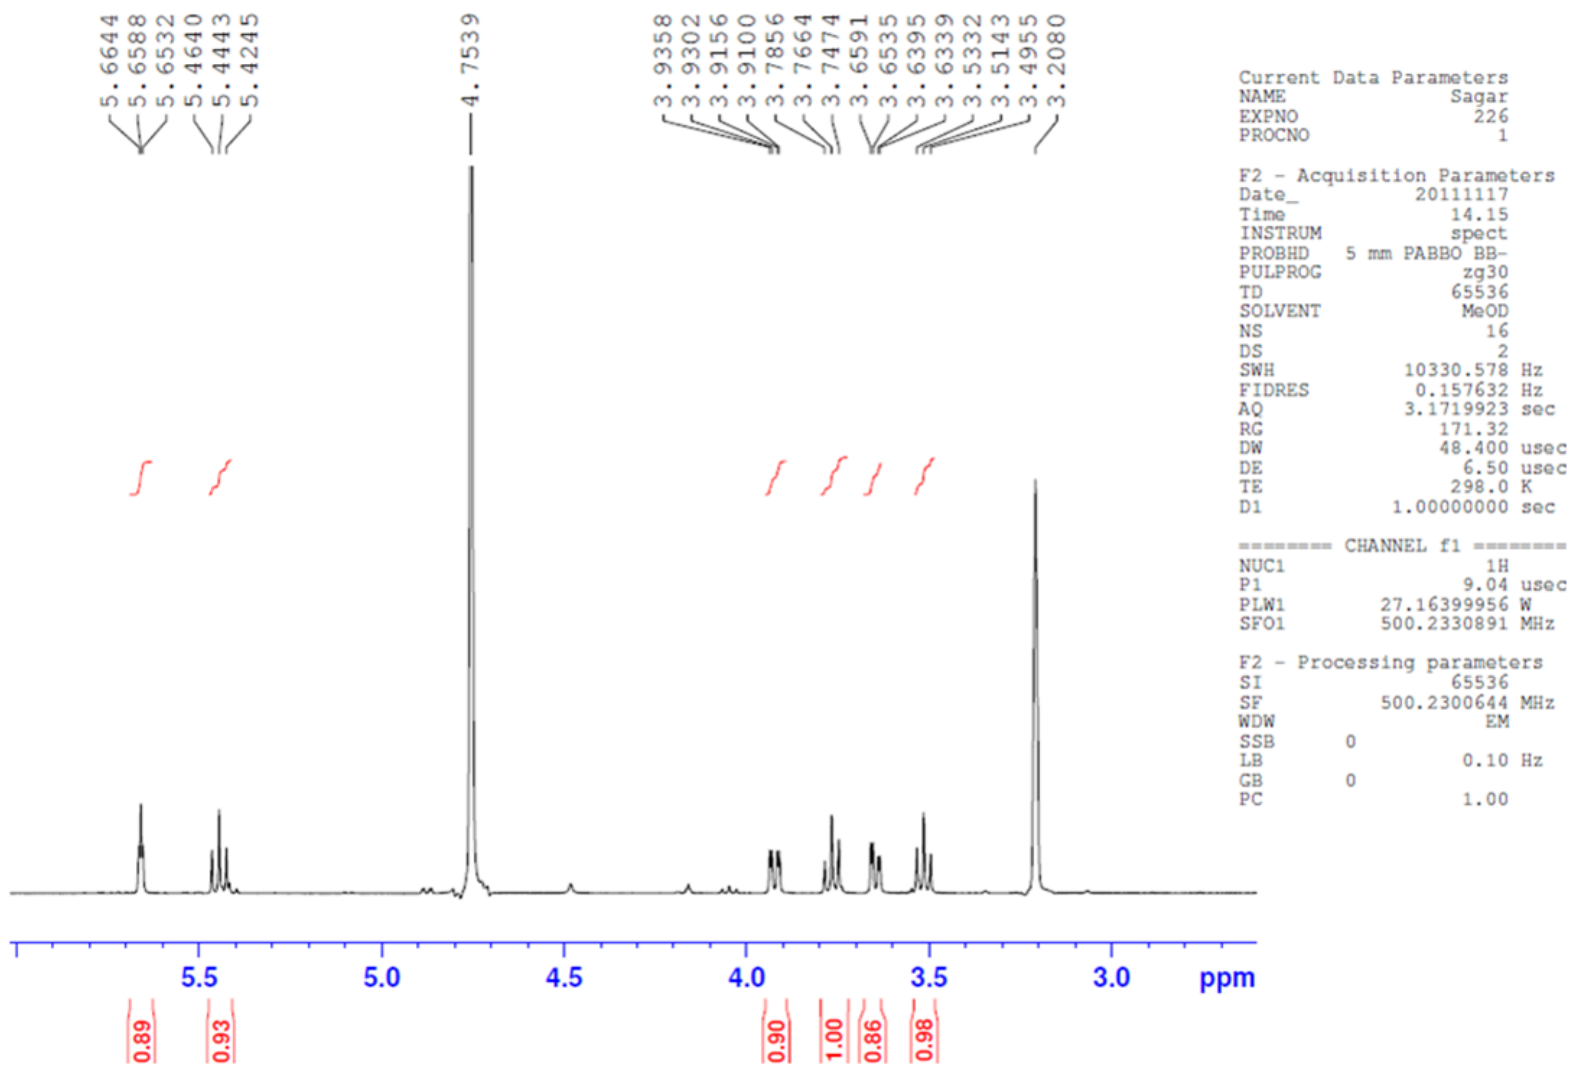

# Supplementary Information

## <sup>1</sup>H NMR of **11** in in CD<sub>3</sub>OD (zoom)

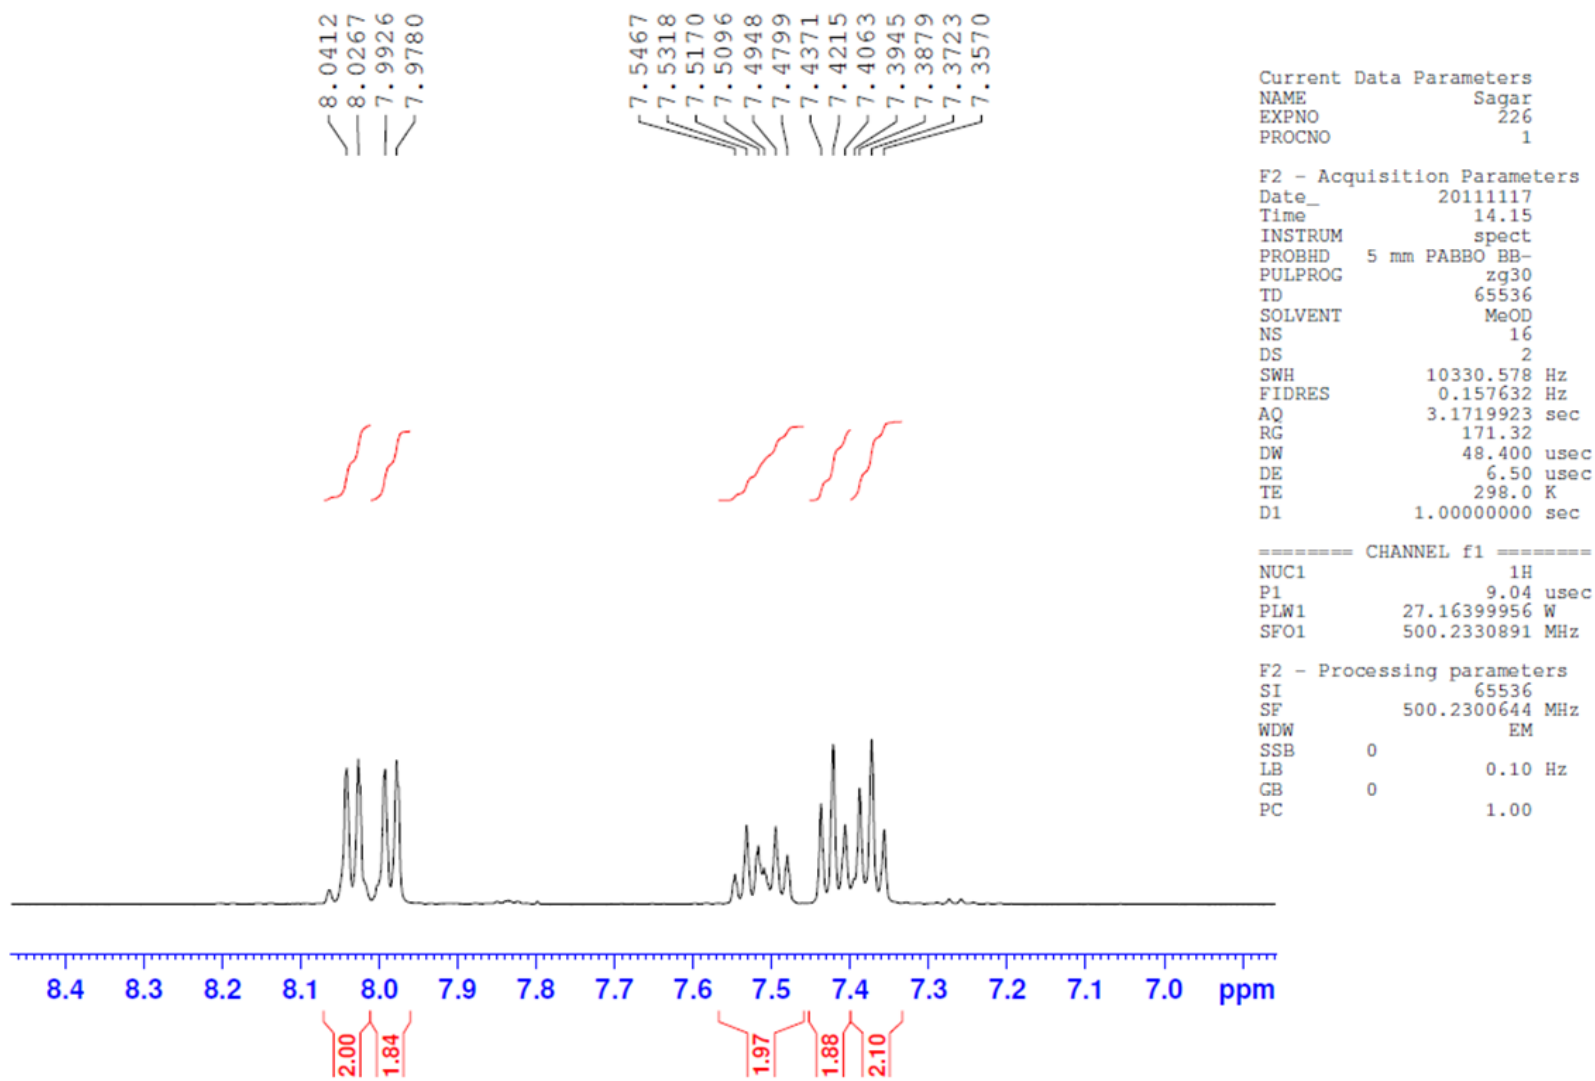

# Supplementary Information

## <sup>13</sup>C NMR of **3a** + *myo*-inositol (1:1)

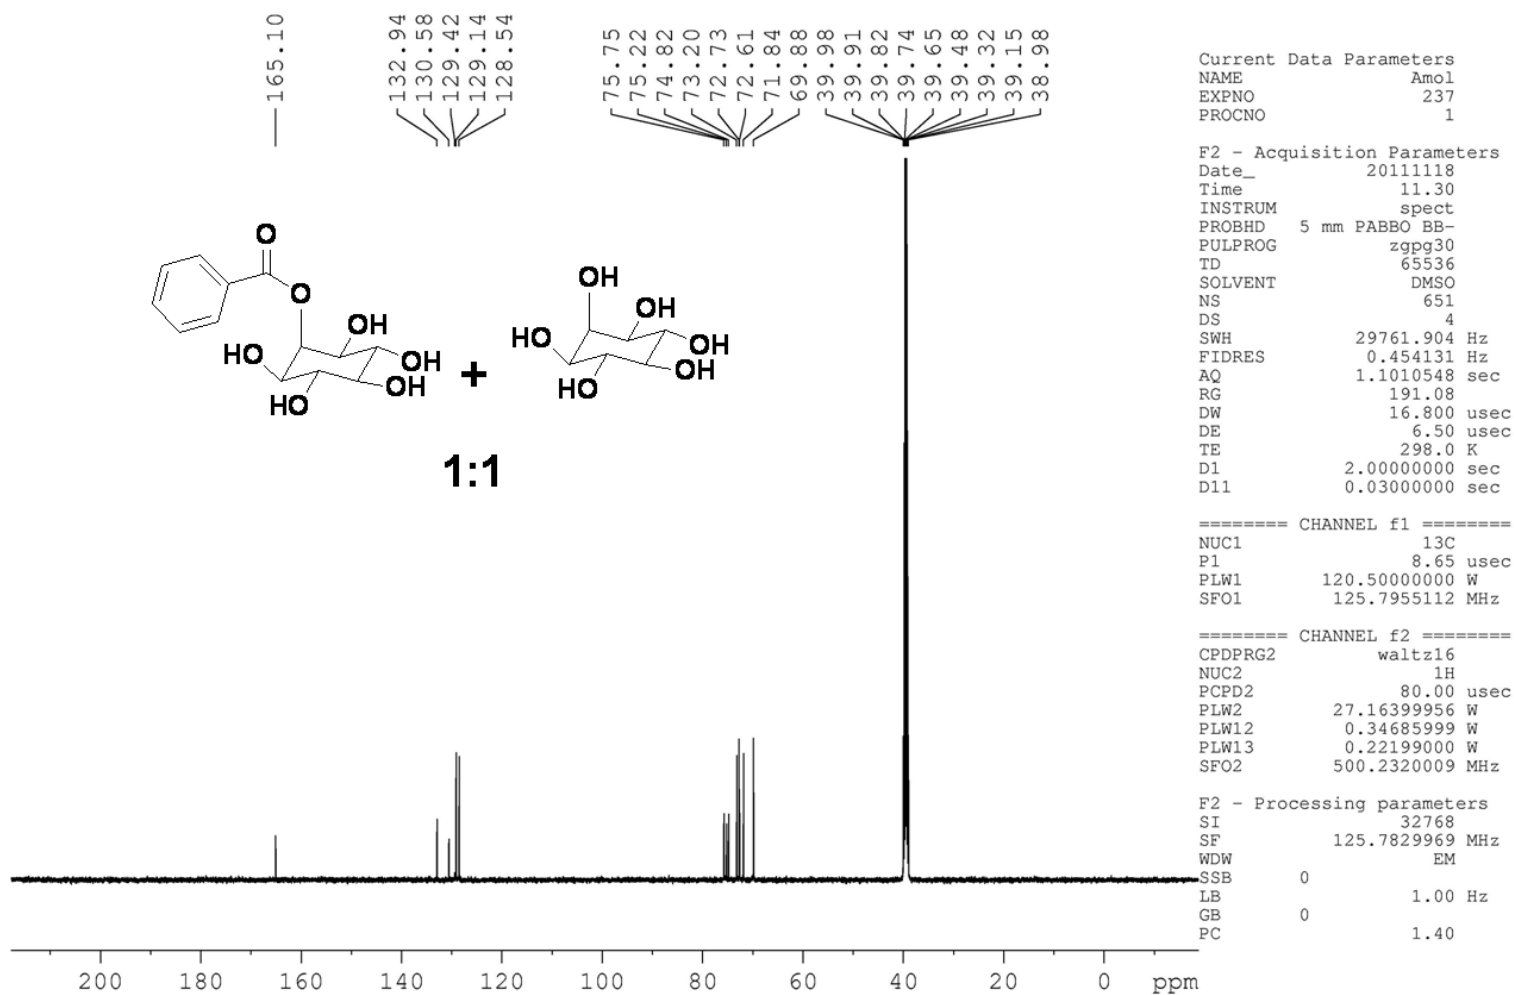

# Supplementary Information

## <sup>13</sup>C NMR of **3a** + *myo*-inositol (1:1) (zoom)

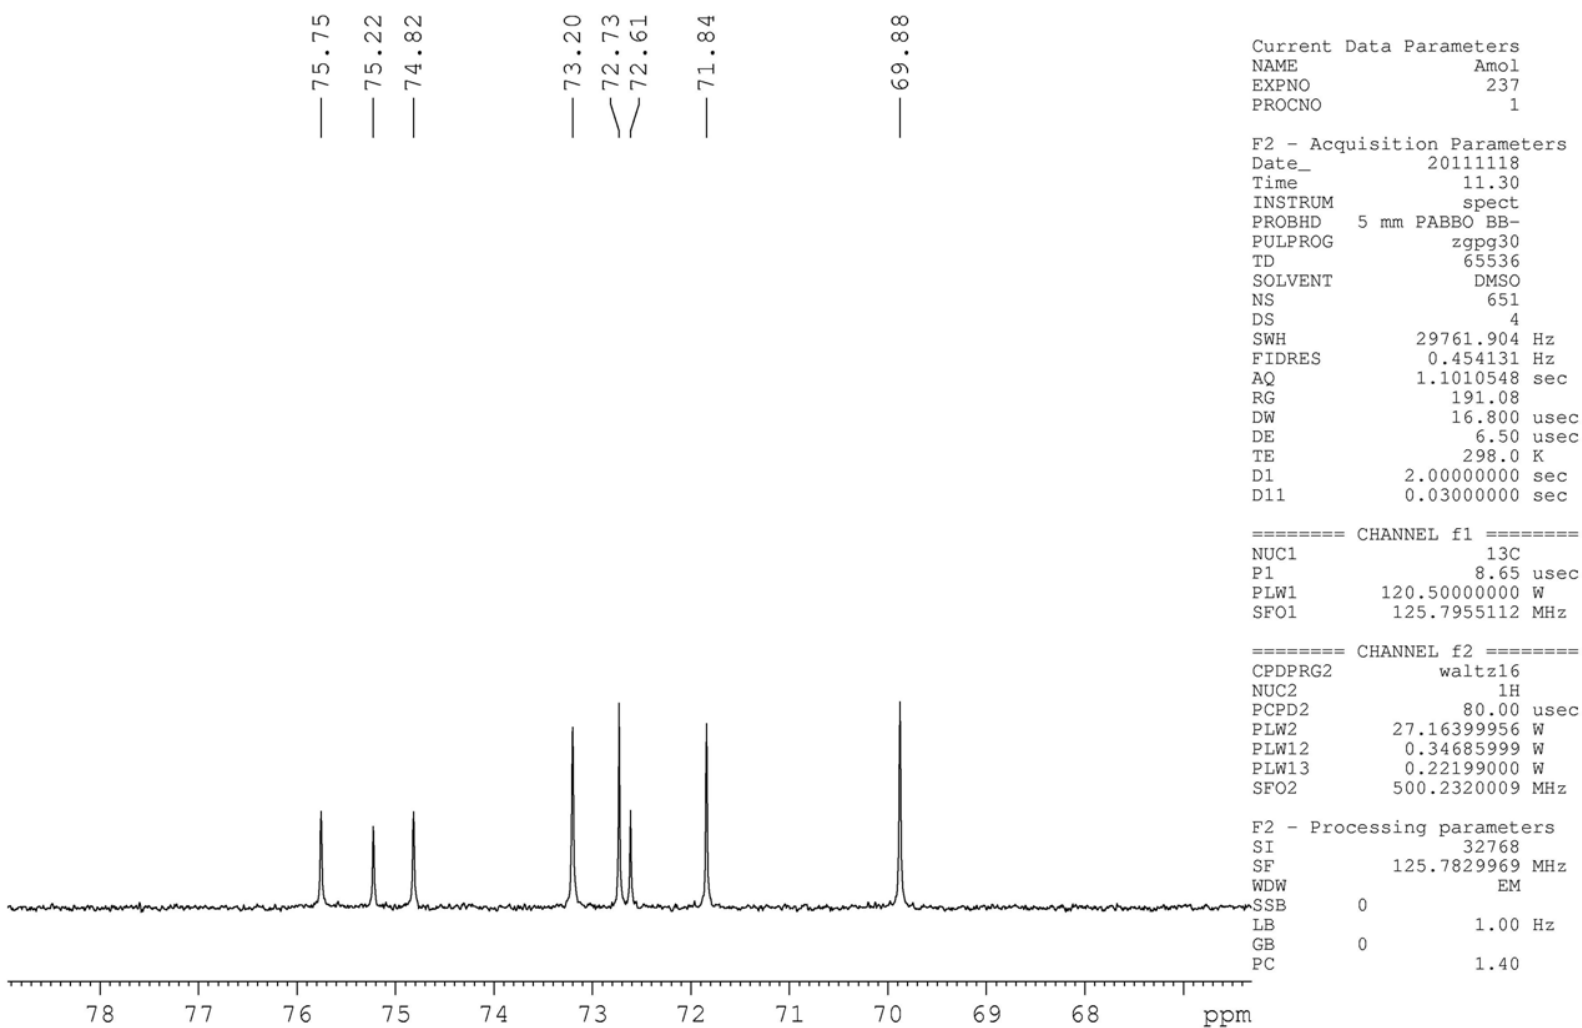



# Supplementary Information

## <sup>1</sup>H NMR of **12** (zoom)

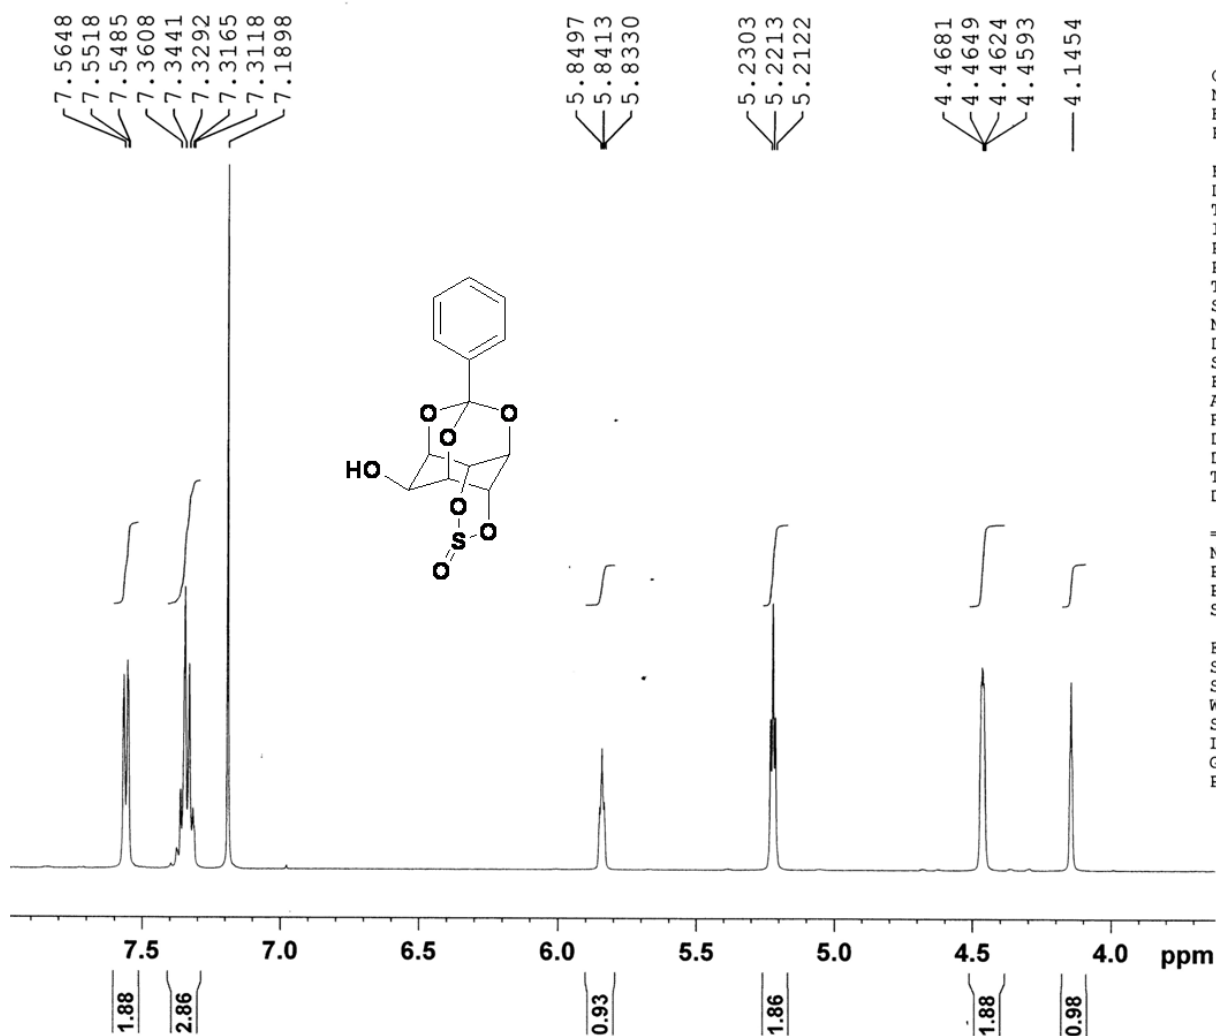

Current Data Parameters  
NAME Amol  
EXPNO 53  
PROCNO 1

F2 - Acquisition Parameters  
Date 20110711  
Time 17.58  
INSTRUM spect  
PROBHD 5 mm PABBO BB-  
PULPROG zg30  
TD 65536  
SOLVENT CDCl3  
NS 16  
DS 2  
SWH 10330.578 Hz  
FIDRES 0.157632 Hz  
AQ 3.1719923 sec  
RG 191.08  
DW 48.400 usec  
DE 6.50 usec  
TE 298.0 K  
D1 1.00000000 sec

===== CHANNEL f1 =====  
NUC1 1H  
P1 9.04 usec  
PLW1 27.16399956 W  
SFO1 500.2330891 MHz

F2 - Processing parameters  
SI 65536  
SF 500.2300514 MHz  
WDW EM  
SSB 0  
LB 0.10 Hz  
GB 0  
PC 1.00



# Supplementary Information

## COSY of 12

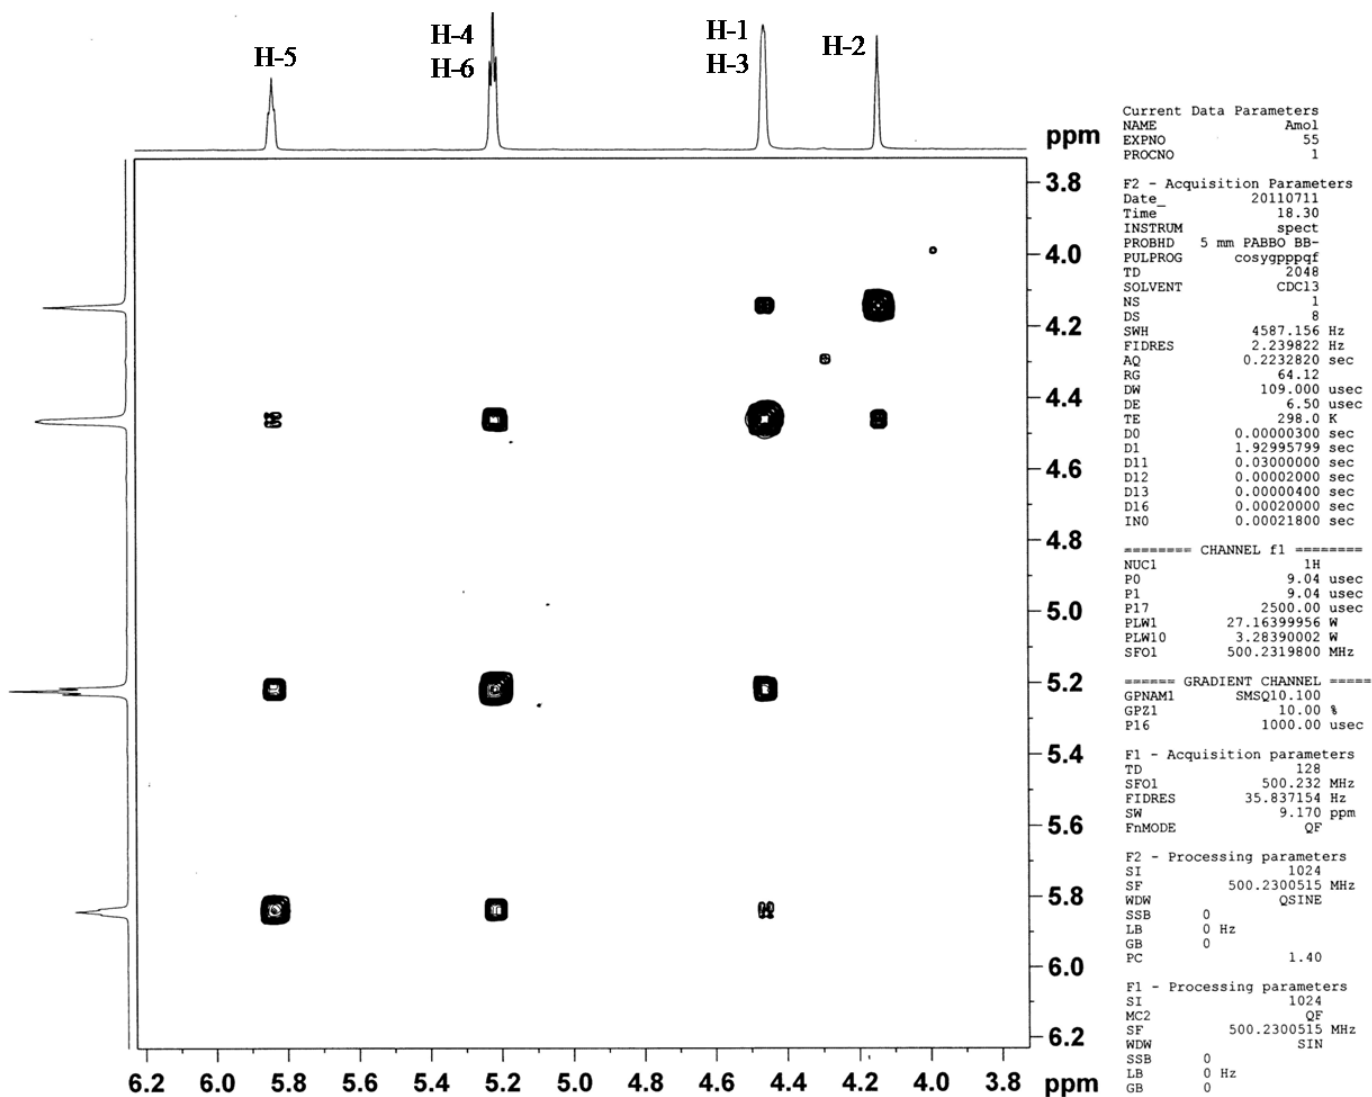

# Supplementary Information

## <sup>13</sup>C NMR of **12**

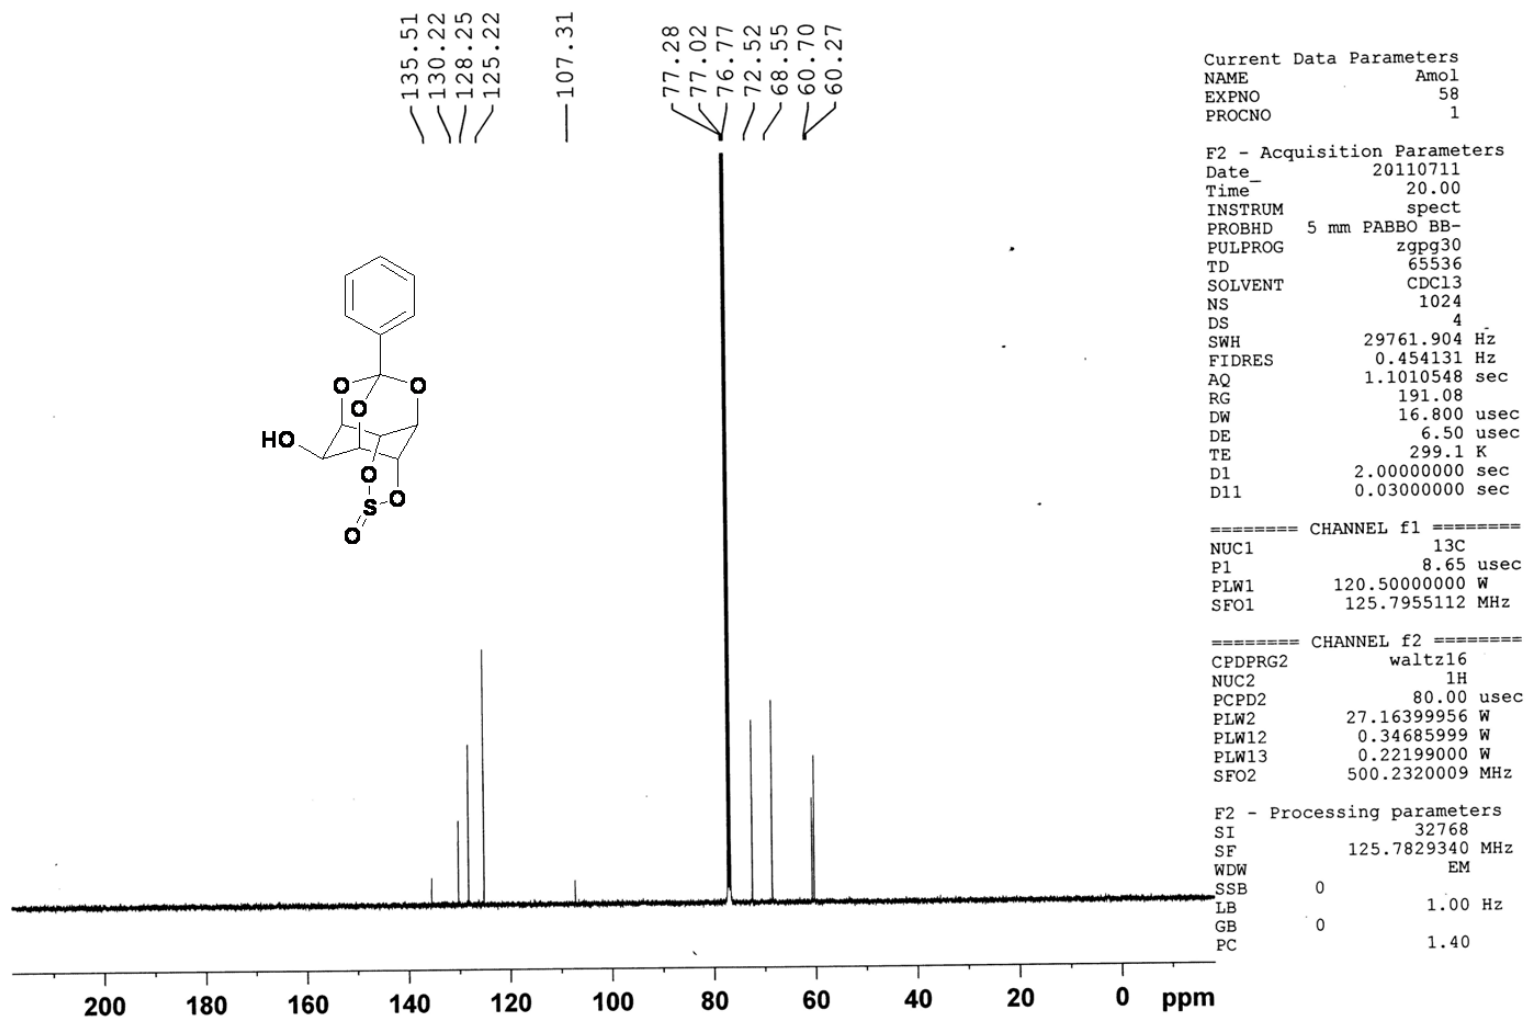

# Supplementary Information

## <sup>1</sup>H NMR of **10**

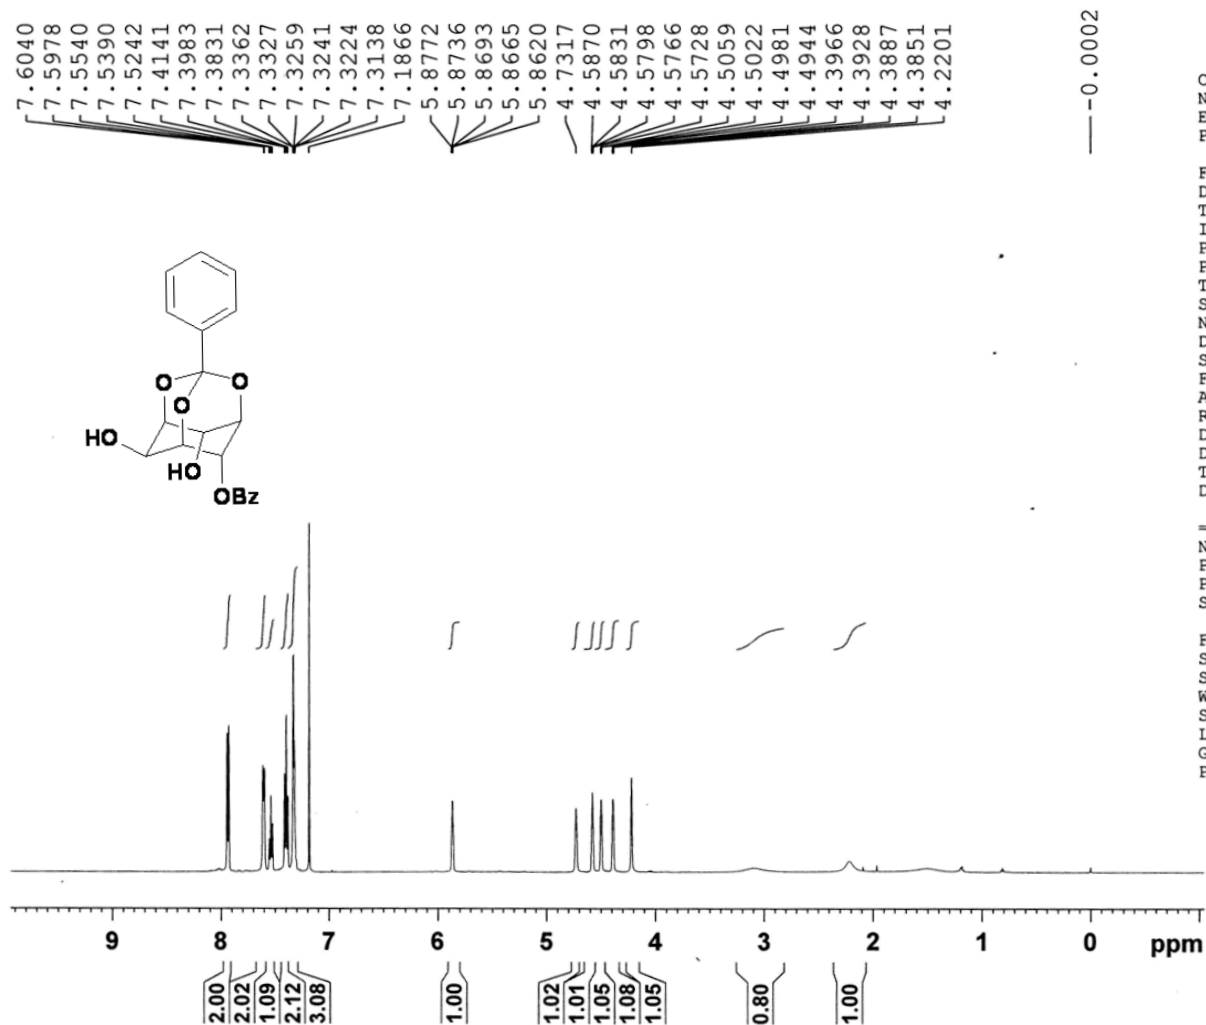

Current Data Parameters  
NAME Sagar  
EXPNO 30  
PROCNO 1

F2 - Acquisition Parameters  
Date\_ 20110712  
Time\_ 16.28  
INSTRUM spect  
PROBHD 5 mm PABBO BB-  
PULPROG zg30  
TD 65536  
SOLVENT CDCl<sub>3</sub>  
NS 16  
DS 2  
SWH 10330.578 Hz  
FIDRES 0.157632 Hz  
AQ 3.1719923 sec  
RG 191.08  
DW 48.400 usec  
DE 6.50 usec  
TE 302.0 K  
D1 1.00000000 sec

===== CHANNEL f1 =====  
NUC1 1H  
P1 9.04 usec  
PLW1 27.16399956 W  
SFO1 500.2330891 MHz

F2 - Processing parameters  
SI 65536  
SF 500.2300533 MHz  
WDW EM  
SSB 0  
LB 0.10 Hz  
GB 0  
PC 1.00

# Supplementary Information

## <sup>1</sup>H NMR of **10** (zoom)

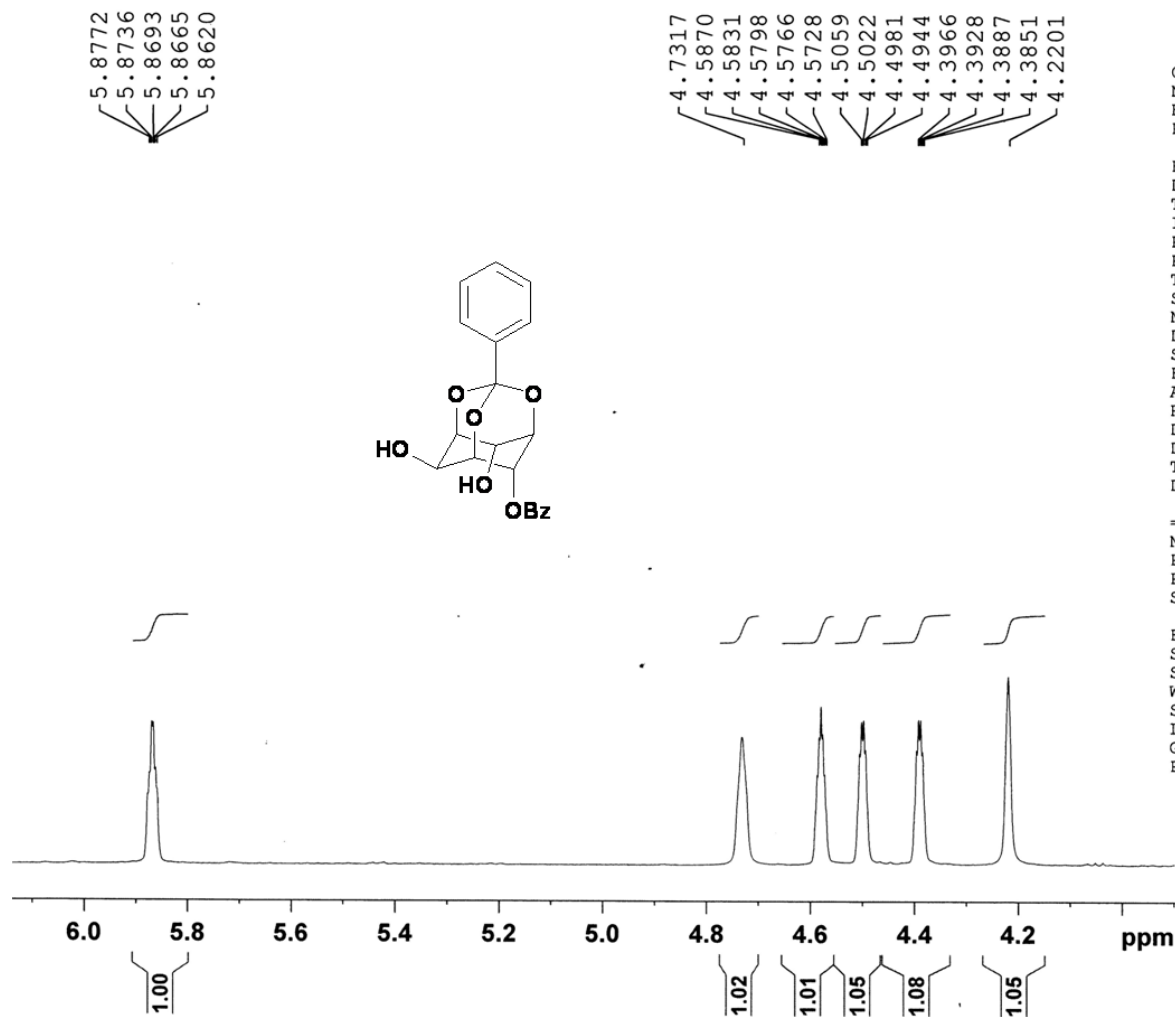

Current Data Parameters  
NAME Sagar  
EXPNO 30  
PROCNO 1

F2 - Acquisition Parameters  
Date\_ 20110712  
Time 16.28  
INSTRUM spect  
PROBHD 5 mm PABBO BB-  
PULPROG zg30  
TD 65536  
SOLVENT CDC13  
NS 16  
DS 2  
SWH 10330.578 Hz  
FIDRES 0.157632 Hz  
AQ 3.1719923 sec  
RG 191.08  
DW 48.400 usec  
DE 6.50 usec  
TE 302.0 K  
D1 1.00000000 sec

===== CHANNEL f1 =====  
NUC1 1H  
P1 9.04 usec  
PLW1 27.16399956 W  
SFO1 500.2330891 MHz

F2 - Processing parameters  
SI 65536  
SF 500.2300533 MHz  
WDW EM  
SSB 0  
LB 0.10 Hz  
GB 0  
PC 1.00

# Supplementary Information

## COSY of 10

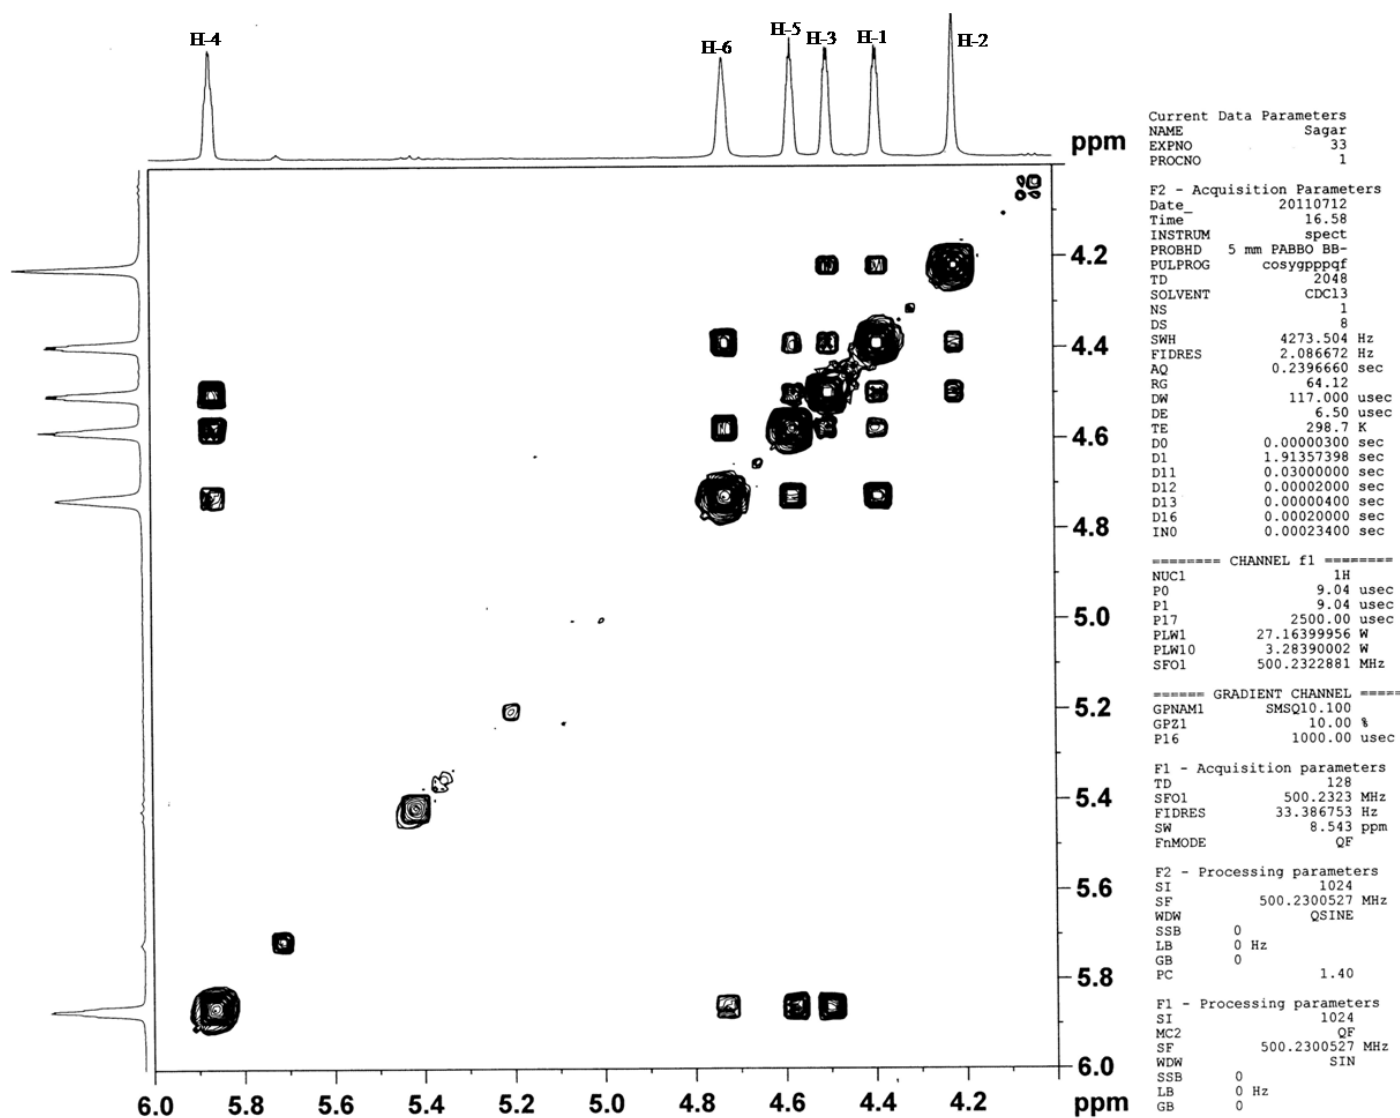

# Supplementary Information

## <sup>13</sup>C NMR of **10**

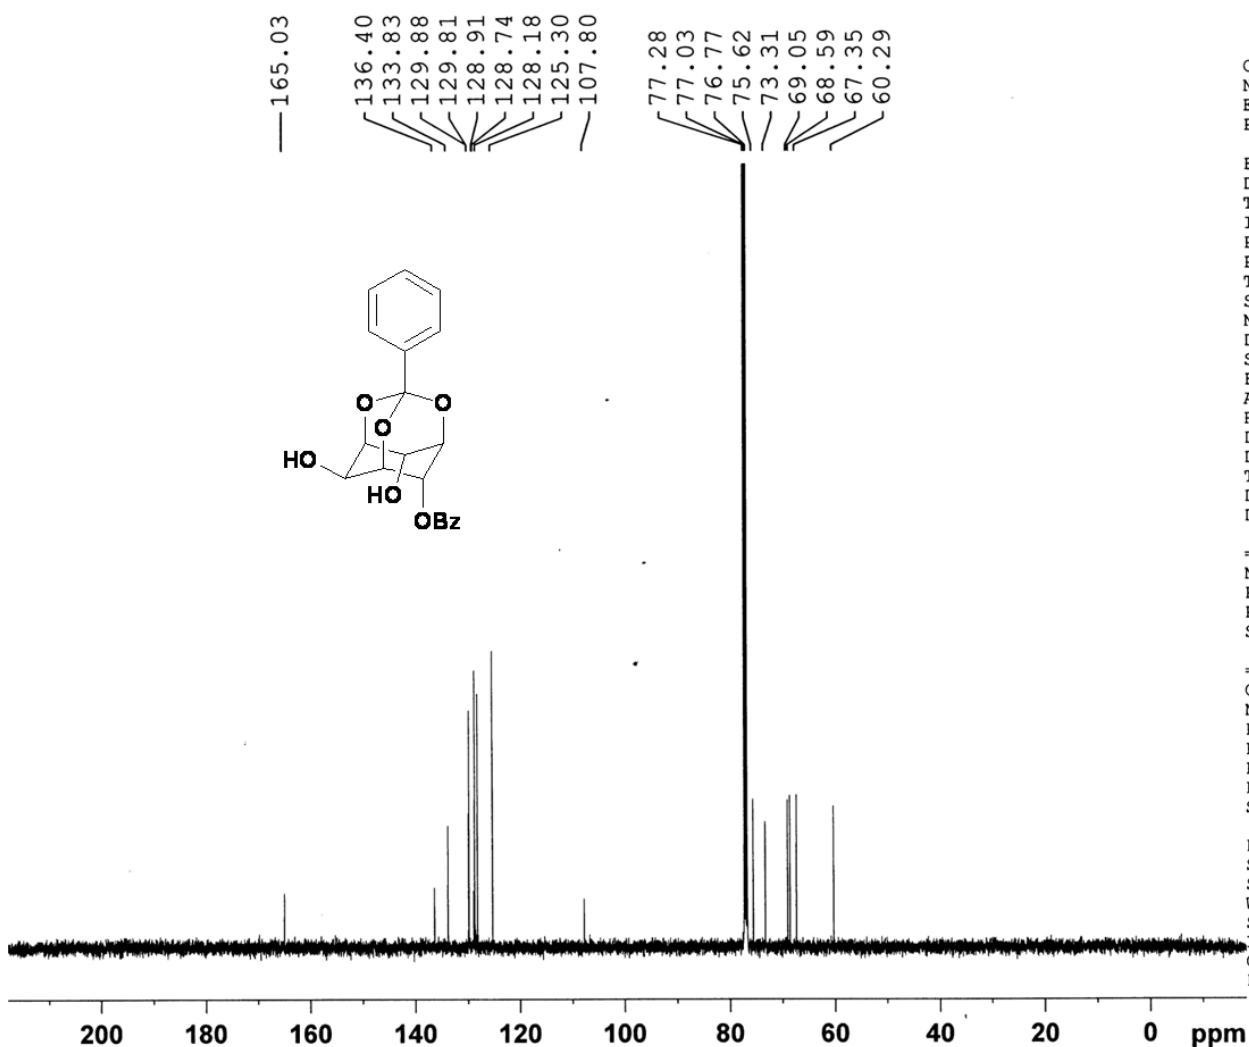

```

Current Data Parameters
NAME          Sagar
EXPNO         35
PROCNO        1

F2 - Acquisition Parameters
Date_         20110712
Time          17.08
INSTRUM       spect
PROBHD        5 mm PABBO BB-
PULPROG       zgpg30
TD            65536
SOLVENT       CDCl3
NS            502
DS            4
SWH           29761.904 Hz
FIDRES        0.454131 Hz
AQ            1.1010548 sec
RG            191.08
DW            16.800 usec
DE            6.50 usec
TE            298.7 K
D1            2.00000000 sec
D11           0.03000000 sec

===== CHANNEL f1 =====
NUC1           13C
P1             8.65 usec
PLW1          120.50000000 W
SFO1          125.7955112 MHz

===== CHANNEL f2 =====
CPDPRG2       waltz16
NUC2           1H
PCPD2         80.00 usec
PLW2          27.16399956 W
PLW12         0.34685999 W
PLW13         0.22199000 W
SFO2          500.2320009 MHz

F2 - Processing parameters
SI            32768
SF           125.7829340 MHz
WDW           EM
SSB           0
LB            1.00 Hz
GB            0
PC            1.40
    
```
